# Supplementary material for: Exploration of Long-Chain Vitamin E Metabolites for the Discovery of a Highly Potent, Orally Effective, and Metabolically Stable 5-LOX Inhibitor that Limits Inflammation
Source: PubMed Central journal article supplement (PMC8365602; doi:10.1021/acs.jmedchem.1c00806), 2021-07-19
Supplement: jm1c00806_si_001.pdf [file jm1c00806_si_001.pdf]

## SUPPORTING INFORMATION

### Exploration of long-chain vitamin E metabolites for the discovery of a highly potent, orally effective and metabolically stable 5-LOX inhibitor that limits inflammation

Konstantin Neukirch<sup>1,2‡</sup>, Khaled Alsabil<sup>3‡</sup>, Chau-Phi Dinh<sup>3‡</sup>, Rossella Bilancia<sup>4</sup>, Martin Raasch<sup>5</sup>, Alexia Ville<sup>3‡</sup>, Ida Cerqua<sup>4</sup>, Guillaume Viault<sup>3</sup>, Dimitri Bréard<sup>3</sup>, Simona Pace<sup>2</sup>, Veronika Temml<sup>6</sup>, Elena Brunner<sup>2</sup>, Paul M. Jordan<sup>2</sup>, Marta C. Marques<sup>7</sup>, Konstantin Loeser<sup>2</sup>, André Gollowitzer<sup>1,2</sup>, Stephan Permann<sup>1</sup>, Jana Gerstmeier<sup>2</sup>, Stefan Lorkowski<sup>8</sup>, Hermann Stuppner<sup>9</sup>, Ulrike Garscha<sup>10</sup>, Tiago Rodrigues<sup>7</sup>, Gonçalo J. L. Bernardes<sup>7,11</sup>, Daniela Schuster<sup>6</sup>, Denis Séraphin<sup>3</sup>, Pascal Richomme<sup>3</sup>, Antonietta Rossi<sup>4</sup>, Alexander S. Mosig<sup>5</sup>, Fiorentina Roviezzo<sup>4</sup>, Oliver Werz<sup>2 \*</sup>, Jean-Jacques Helesbeux<sup>3 \*</sup>, Andreas Koeberle<sup>1,2 \*</sup>

<sup>1</sup>Michael Popp Institute and Center for Molecular Biosciences Innsbruck (CMBI), University of Innsbruck, 6020 Innsbruck, Austria

<sup>2</sup>Department of Pharmaceutical/Medicinal Chemistry, Institute of Pharmacy, Friedrich Schiller University Jena, 07743 Jena, Germany

<sup>3</sup>Univ Angers, SONAS, SFR QUASAV, F-49000 Angers, France

<sup>4</sup>Department of Pharmacy, School of Medicine and Surgery, University of Naples Federico II, 80131 Naples, Italy

<sup>5</sup>Institute of Biochemistry II, Jena University Hospital, 07747 Jena, Germany

<sup>6</sup>Department of Pharmaceutical and Medicinal Chemistry, Paracelsus Medical University Salzburg, 5020 Salzburg, Austria

<sup>7</sup>Instituto de Medicina Molecular João Lobo Antunes, Faculdade de Medicina, Universidade de Lisboa, 1649-028 Lisboa, Portugal

<sup>8</sup>Department of Nutritional Biochemistry and Physiology, Institute of Nutritional Science and Competence Cluster for Nutrition and Cardiovascular Health (nutriCARD), Halle-Jena-Leipzig, Friedrich Schiller University Jena, 07743 Jena, Germany

<sup>9</sup>Institute of Pharmacy/Pharmacognosy and Center for Molecular Biosciences Innsbruck (CMBI), University of Innsbruck, 6020 Innsbruck, Austria

<sup>10</sup>Department of Pharmaceutical/Medicinal Chemistry, Institute of Pharmacy, University of Greifswald, 17489 Greifswald, Germany

<sup>11</sup>Department of Chemistry, University of Cambridge, CB2 1EW, Cambridge, UK

\* Andreas Koeberle – Michael Popp Institute and Center for Molecular Biosciences Innsbruck (CMBI), University of Innsbruck, A-6020 Innsbruck, Austria; orcid.org/0000-0001-6269-5088; Tel.: +43 512 507-57903; E-mail: [andreas.koeberle@uibk.ac.at](mailto:andreas.koeberle@uibk.ac.at)

Jean-Jacques Helesbeux – SONAS, EA921, UNIV Angers, SFR QUASAV, Faculty of Health Sciences, Department of Pharmacy, 49045 Angers Cedex 01, France; orcid.org/0000-0002-1894-8911; Tel.: +33 249 180 441; E-mail: [jean-jacques.helesbeux@univ-angers.fr](mailto:jean-jacques.helesbeux@univ-angers.fr)

Oliver Werz – Department of Pharmaceutical/Medicinal Chemistry, Institute of Pharmacy, Friedrich-Schiller-University Jena, 07743 Jena, Germany; orcid.org/0000-0002-5064-4379; Tel.: +49 3641 9-49801; Fax: +49 3641 9-49802; E-mail: [oliver.werz@uni-jena.de](mailto:oliver.werz@uni-jena.de)

## SUPPORTING INFORMATION

### Table of Contents

|                                                                                                                                                             |            |  |
|-------------------------------------------------------------------------------------------------------------------------------------------------------------|------------|--|
| <b>SI TABLES.....</b>                                                                                                                                       | <b>S3</b>  |  |
| Table S1. Inhibition of human isolated 5-LOX and 5-LOX product formation in activated PMNL by natural vitamin E forms and derivatives ( <b>1a-11</b> )..... | S3         |  |
| Table S2. Nomenclature proposed to name natural vitamin E forms and $\omega$ -oxidized derivatives .....                                                    | S6         |  |
| Table S3. Conditions for the quantification of <b>27a</b> and its metabolites by UPLC-MS/MS .....                                                           | S7         |  |
| <b>SI SCHEMES .....</b>                                                                                                                                     | <b>S8</b>  |  |
| Scheme S1. SARs on cell-free 5-LOX inhibition <sup>a</sup> .....                                                                                            | S8         |  |
| Scheme S2. SARs on the inhibition of 5-LOX product formation in PMNL <sup>a</sup> .....                                                                     | S9         |  |
| <b>SI FIGURES.....</b>                                                                                                                                      | <b>S10</b> |  |
| Figure S1. Correlation network of the compound library for inhibition of cell-free 5-LOX. ....                                                              | S10        |  |
| Figure S2. Molecular docking simulation of 5-LOX.....                                                                                                       | S11        |  |
| Figure S3. Fluorescence spectroscopic analysis of 5-LOX ligand interactions.....                                                                            | S12        |  |
| Figure S4. Effect of <b>27a</b> on human monocyte and PBMC viability. ....                                                                                  | S13        |  |
| Figure S5. Compound <b>27a</b> selectively inhibits 5-LOX product formation in activated monocytes.....                                                     | S14        |  |
| Figure S6. Compound <b>27a</b> attenuates cytokine-triggered defects in reconstructed human epidermis (RHE).....                                            | S15        |  |
| Figure S7. Effect of <b>27a</b> on resolvin (Rv)E3 and systemic LTB <sub>4</sub> levels in mice with acute peritonitis. ....                                | S16        |  |
| Figure S8. <sup>1</sup> H and <sup>13</sup> C NMR spectra of <b>49</b> in acetone- <i>d</i> <sub>6</sub> .....                                              | S17        |  |
| Figure S9. <sup>1</sup> H and <sup>13</sup> C NMR spectra of <b>50</b> in CDCl <sub>3</sub> .....                                                           | S18        |  |
| Figure S10. <sup>1</sup> H and <sup>13</sup> C NMR spectra of <b>13e</b> in CDCl <sub>3</sub> .....                                                         | S19        |  |
| Figure S11. <sup>1</sup> H and <sup>13</sup> C NMR spectra of <b>51</b> in CDCl <sub>3</sub> .....                                                          | S20        |  |
| Figure S12. <sup>1</sup> H and <sup>13</sup> C NMR spectra of <b>2</b> in acetone- <i>d</i> <sub>6</sub> .....                                              | S21        |  |
| Figure S13. <sup>1</sup> H and <sup>13</sup> C NMR spectra of <b>4</b> in acetone- <i>d</i> <sub>6</sub> .....                                              | S22        |  |
| Figure S14. <sup>1</sup> H and <sup>13</sup> C NMR spectra of <b>53</b> in CDCl <sub>3</sub> .....                                                          | S23        |  |
| Figure S15. <sup>1</sup> H and <sup>13</sup> C NMR spectra of <b>19b</b> in CDCl <sub>3</sub> .....                                                         | S24        |  |
| Figure S16. <sup>1</sup> H and <sup>13</sup> C NMR spectra of <b>19a</b> in CDCl <sub>3</sub> .....                                                         | S25        |  |
| Figure S17. <sup>1</sup> H and <sup>13</sup> C NMR spectra of <b>20</b> in CDCl <sub>3</sub> .....                                                          | S26        |  |
| Figure S18. <sup>1</sup> H and <sup>13</sup> C NMR spectra of <b>21</b> in CDCl <sub>3</sub> .....                                                          | S27        |  |
| Figure S19. <sup>1</sup> H and <sup>13</sup> C NMR spectra of <b>22</b> in CDCl <sub>3</sub> .....                                                          | S28        |  |
| Figure S20. <sup>1</sup> H and <sup>13</sup> C NMR spectra of <b>55</b> in CDCl <sub>3</sub> .....                                                          | S29        |  |
| Figure S21. <sup>1</sup> H and <sup>13</sup> C NMR spectra of <b>15b</b> in CDCl <sub>3</sub> .....                                                         | S30        |  |
| Figure S22. <sup>1</sup> H and <sup>13</sup> C NMR spectra of <b>15a</b> in CDCl <sub>3</sub> .....                                                         | S31        |  |
| Figure S23. <sup>1</sup> H and <sup>13</sup> C NMR spectra of <b>25</b> in CDCl <sub>3</sub> .....                                                          | S32        |  |
| Figure S24. <sup>1</sup> H and <sup>13</sup> C NMR spectra of <b>58</b> in CDCl <sub>3</sub> .....                                                          | S33        |  |
| Figure S25. <sup>1</sup> H and <sup>13</sup> C NMR spectra of <b>14</b> in CDCl <sub>3</sub> .....                                                          | S34        |  |
| Figure S26. <sup>1</sup> H and <sup>13</sup> C NMR spectra of <b>59</b> in CDCl <sub>3</sub> .....                                                          | S35        |  |
| Figure S27. <sup>1</sup> H and <sup>13</sup> C NMR spectra of <b>16</b> in CDCl <sub>3</sub> .....                                                          | S36        |  |
| Figure S28. <sup>1</sup> H and <sup>13</sup> C NMR spectra of <b>60</b> in CDCl <sub>3</sub> .....                                                          | S37        |  |
| Figure S29. <sup>1</sup> H and <sup>13</sup> C NMR spectra of <b>17</b> in CDCl <sub>3</sub> .....                                                          | S38        |  |
| Figure S30. <sup>1</sup> H and <sup>13</sup> C NMR spectra of <b>61</b> in CDCl <sub>3</sub> .....                                                          | S39        |  |
| Figure S31. <sup>1</sup> H and <sup>13</sup> C NMR spectra of <b>18</b> in CDCl <sub>3</sub> .....                                                          | S40        |  |
| Figure S32. <sup>1</sup> H and <sup>13</sup> C NMR spectra of <b>65</b> in CDCl <sub>3</sub> .....                                                          | S41        |  |
| Figure S33. <sup>1</sup> H and <sup>13</sup> C NMR spectra of <b>66</b> in CDCl <sub>3</sub> .....                                                          | S42        |  |
| Figure S34. <sup>1</sup> H and <sup>13</sup> C NMR spectra of <b>26</b> in CDCl <sub>3</sub> .....                                                          | S43        |  |
| Figure S35. <sup>1</sup> H and <sup>13</sup> C NMR spectra of <b>41</b> in acetone- <i>d</i> <sub>6</sub> .....                                             | S44        |  |
| Figure S36. <sup>1</sup> H and <sup>13</sup> C NMR spectra of <b>40</b> in methanol- <i>d</i> <sub>4</sub> .....                                            | S45        |  |
| Figure S37. <sup>1</sup> H and <sup>13</sup> C NMR spectra of <b>35</b> in acetone- <i>d</i> <sub>6</sub> .....                                             | S46        |  |
| Figure S38. <sup>1</sup> H and <sup>13</sup> C NMR spectra of <b>36</b> in acetone- <i>d</i> <sub>6</sub> .....                                             | S47        |  |
| Figure S39. <sup>1</sup> H and <sup>13</sup> C NMR spectra of <b>37</b> in acetone- <i>d</i> <sub>6</sub> .....                                             | S48        |  |
| Figure S40. <sup>1</sup> H and <sup>13</sup> C NMR spectra of <b>38</b> in acetone- <i>d</i> <sub>6</sub> .....                                             | S49        |  |
| Figure S41. <sup>1</sup> H and <sup>13</sup> C NMR spectra of <b>39</b> in acetone- <i>d</i> <sub>6</sub> .....                                             | S50        |  |
| Figure S42. <sup>1</sup> H and <sup>13</sup> C NMR spectra of <b>42</b> in acetone- <i>d</i> <sub>6</sub> .....                                             | S51        |  |
| Figure S43. <sup>1</sup> H and <sup>13</sup> C NMR spectra of <b>43</b> in acetone- <i>d</i> <sub>6</sub> .....                                             | S52        |  |
| Figure S44. <sup>1</sup> H and <sup>13</sup> C NMR spectra of <b>67</b> in acetone- <i>d</i> <sub>6</sub> .....                                             | S53        |  |
| Figure S45. <sup>1</sup> H and <sup>13</sup> C NMR spectra of <b>31</b> in acetone- <i>d</i> <sub>6</sub> .....                                             | S54        |  |
| Figure S46. <sup>1</sup> H and <sup>13</sup> C NMR spectra of <b>70</b> in acetone- <i>d</i> <sub>6</sub> .....                                             | S55        |  |
| Figure S47. <sup>1</sup> H and <sup>13</sup> C NMR spectra of <b>48</b> in acetone- <i>d</i> <sub>6</sub> .....                                             | S56        |  |
| Figure S48. <sup>1</sup> H and <sup>13</sup> C NMR spectra of <b>46</b> in acetone- <i>d</i> <sub>6</sub> .....                                             | S57        |  |
| Figure S49. <sup>1</sup> H and <sup>13</sup> C NMR spectra of <b>68</b> in acetone- <i>d</i> <sub>6</sub> .....                                             | S58        |  |
| Figure S50. <sup>1</sup> H and <sup>13</sup> C NMR spectra of <b>31</b> in acetone- <i>d</i> <sub>6</sub> .....                                             | S59        |  |
| Figure S51. <sup>1</sup> H and <sup>13</sup> C NMR spectra of <b>69</b> in acetone- <i>d</i> <sub>6</sub> .....                                             | S60        |  |
| Figure S52. <sup>1</sup> H and <sup>13</sup> C NMR spectra of <b>32</b> in acetone- <i>d</i> <sub>6</sub> .....                                             | S61        |  |
| Figure S53. <sup>1</sup> H and <sup>13</sup> C NMR spectra of <b>62</b> in CDCl <sub>3</sub> .....                                                          | S62        |  |
| Figure S54. <sup>1</sup> H and <sup>13</sup> C NMR spectra of <b>28</b> in CDCl <sub>3</sub> .....                                                          | S63        |  |
| Figure S55. <sup>1</sup> H and <sup>13</sup> C NMR spectra of <b>63</b> in CDCl <sub>3</sub> .....                                                          | S64        |  |
| Figure S56. <sup>1</sup> H and <sup>13</sup> C NMR spectra of <b>29</b> in CDCl <sub>3</sub> .....                                                          | S65        |  |
| Figure S57. HPLC-ELSD spectrum of <b>13a</b> .....                                                                                                          | S66        |  |
| Figure S58. HPLC-ELSD spectrum of <b>13d</b> .....                                                                                                          | S66        |  |
| Figure S59. HPLC-ELSD spectrum of <b>27a</b> .....                                                                                                          | S67        |  |
| Figure S60. HPLC-ELSD spectrum of <b>27d</b> .....                                                                                                          | S67        |  |

## SI TABLES

Table S1. Inhibition of human isolated 5-LOX and 5-LOX product formation in activated PMNL by natural vitamin E forms and derivatives (1a-11)

| Compound  | Structure         |                                  | 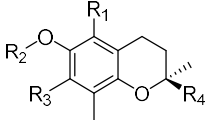 | 5-LOX enzyme                                                                         |                          | 5-LOX PMNL                         |                          |                                    |
|-----------|-------------------|----------------------------------|-----------------------------------------------------------------------------------|--------------------------------------------------------------------------------------|--------------------------|------------------------------------|--------------------------|------------------------------------|
|           | R1                | R2                               |                                                                                   | R3                                                                                   | R4                       | IC <sub>50</sub> [μM] <sup>a</sup> | at 1 μM [%] <sup>b</sup> | IC <sub>50</sub> [μM] <sup>a</sup> |
| <b>1a</b> | CH <sub>3</sub>   | H                                | CH <sub>3</sub>                                                                   |    | > 1 <sup>d</sup>         | 86.1 ± 8.3                         | > 3 <sup>d</sup>         | 88.6 ± 10.5                        |
| <b>1b</b> | CH <sub>3</sub>   | H                                | H                                                                                 |    | 0.75 ± 0.15 <sup>d</sup> | 32.8 ± 9.0                         | > 3 <sup>d</sup>         | 79.6 ± 6.1                         |
| <b>1c</b> | H                 | H                                | CH <sub>3</sub>                                                                   |    | 0.91 ± 0.15 <sup>d</sup> | 47.0 ± 4.5                         | > 3 <sup>d</sup>         | 78.5 ± 13.6                        |
| <b>1d</b> | H                 | H                                | H                                                                                 |    | 0.60 ± 0.25              | 43.3 ± 7.2                         | > 3 <sup>d</sup>         | 107.4 ± 3.2                        |
| <b>2</b>  | Cl                | H                                | CHO                                                                               |    | > 1                      | 72.9 ± 5.6                         | > 3                      | 109.8 ± 10.7                       |
| <b>3</b>  | CHO               | H                                | H                                                                                 |   | > 1                      | 94.6 ± 3.5                         | > 3                      | 92.2 ± 6.3                         |
| <b>4</b>  | CHO               | CH <sub>2</sub> OCH <sub>3</sub> | H                                                                                 |  | > 1                      | 77.3 ± 17.2                        | > 3                      | 91.9 ± 5.3                         |
| <b>5</b>  | CO <sub>2</sub> H | H                                | H                                                                                 |  | > 1                      | 54.6 ± 5.8                         | > 3                      | 80.8 ± 0.6                         |
| <b>6a</b> | CH <sub>3</sub>   | H                                | CH <sub>3</sub>                                                                   |  | 0.33 ± 0.08 <sup>d</sup> | 16.9 ± 6.6                         | > 3 <sup>d</sup>         | 75.5 ± 4.5                         |

|            |                 |   |                 |                                                                                      |                          |            |                          |                         |
|------------|-----------------|---|-----------------|--------------------------------------------------------------------------------------|--------------------------|------------|--------------------------|-------------------------|
| <b>6b</b>  | CH <sub>3</sub> | H | H               | 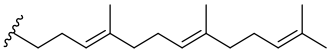   | 0.19 ± 0.03 <sup>d</sup> | 6.4 ± 3.2  | 2.11 ± 0.36 <sup>d</sup> | 41.4 ± 8.0              |
| <b>6c</b>  | H               | H | CH <sub>3</sub> |    | 0.20 ± 0.06 <sup>d</sup> | 6.4 ± 3.2  | > 3 <sup>d</sup>         | 73.5 ± 1.2              |
| <b>6d</b>  | H               | H | H               |    | 0.17 ± 0.10 <sup>d</sup> | 6.7 ± 3.1  | > 3 <sup>d</sup>         | 74.9 ± 8.0              |
| <b>7</b>   | CHO             | H | H               |    | > 1                      | 74.5 ± 4.3 | > 3                      | 87.1 ± 8.0              |
| <b>8</b>   | CHO             | H | Br              |    | > 1                      | 59.0 ± 5.9 | > 3                      | 79.2 ± 16.7             |
| <b>9a</b>  | CH <sub>3</sub> | H | CH <sub>3</sub> |    | 0.35 ± 0.04 <sup>d</sup> | 1.5 ± 0.4  | 0.19 ± 0.05 <sup>d</sup> | 21.6 ± 2.5              |
| <b>9b</b>  | H               | H | H               |    | 0.12 ± 0.04 <sup>d</sup> | 2.1 ± 0.3  | 0.54 ± 0.18 <sup>d</sup> | 22.6 ± 2.4              |
| <b>10a</b> | CH <sub>3</sub> | H | CH <sub>3</sub> |    | 0.11 ± 0.01 <sup>d</sup> | 0.2 ± 0.1  | 0.27 ± 0.10 <sup>d</sup> | 13.2 ± 2.0              |
| <b>10b</b> | CH <sub>3</sub> | H | H               |    | 0.09 ± 0.03 <sup>d</sup> | 0.2 ± 0.1  | 0.38 ± 0.09 <sup>d</sup> | 7.7 ± 1.3               |
| <b>10c</b> | H               | H | H               |  | 0.15 ± 0.05 <sup>d</sup> | 2.7 ± 1.5  | 1.26 ± 0.33 <sup>d</sup> | 8.8 ± 1.9               |
| <b>10d</b> | H               | H | CH <sub>3</sub> |  | 0.12 ± 0.03 <sup>d</sup> | 0.0 ± 0.0  | 0.14 ± 0.02 <sup>d</sup> | 1.1 ± 1.1               |
| <b>10e</b> | H               | H | H               |  | 0.14 ± 0.03 <sup>d</sup> | 0.3 ± 0.2  | 0.22 ± 0.04 <sup>d</sup> | 2.0 ± 0.2               |
| <b>11</b>  | H               | H | H               |  | 0.12 ± 0.05              | 0.4 ± 0.3  | 0.57 ± 0.09              | 17.6 ± 1.3 <sup>b</sup> |



**zil**  
(zileuton)

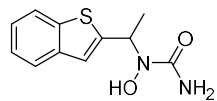

0.69 ± 0.24    34.6 ± 14.1    3.57 ± 0.55    55.6 ± 5.6

---

<sup>a</sup>IC<sub>50</sub> values (μM) and residual activities (% control) at <sup>b</sup>1 or <sup>c</sup>3 μM compound concentration given as mean ± SEM of single determinations obtained in 3 to 4 independent experiments. <sup>d</sup>Highlighted data (grey) originates from Pein et al.<sup>4</sup>.

**Table S2. Nomenclature proposed to name natural vitamin E forms and  $\omega$ -oxidized derivatives**

|                                                       |                                      | <b>T - tocopherol</b>                                  | <b>TE - tocotrienol</b>                                         |
|-------------------------------------------------------|--------------------------------------|--------------------------------------------------------|-----------------------------------------------------------------|
| <b>Scaffold</b>                                       |                                      |                                                        |                                                                 |
|                                                       |                                      | <b>R<sub>1</sub></b>                                   | <b>R<sub>2</sub></b>                                            |
| <b>Chromanol substituents</b>                         | $\alpha$ -                           | CH <sub>3</sub>                                        | CH <sub>3</sub>                                                 |
|                                                       | $\beta$ -                            | CH <sub>3</sub>                                        | H                                                               |
|                                                       | $\gamma$ -                           | H                                                      | CH <sub>3</sub>                                                 |
|                                                       | $\delta$ -                           | H                                                      | H                                                               |
| <b>Exemplary side chain modifications<sup>a</sup></b> |                                      | <b><math>\alpha</math>-T-13'-CH<sub>2</sub>OH (9a)</b> | <b><math>\delta</math>-TE-13'-COOH (13d)</b>                    |
|                                                       |                                      |                                                        |                                                                 |
|                                                       |                                      | <b><math>\alpha</math>-T-13'-COOH (12a)</b>            | <b><math>\alpha</math>-TE-12a',13'-diCH<sub>2</sub>OH (27a)</b> |
|                                                       |                                      |                                                        |                                                                 |
|                                                       |                                      | <b><math>\alpha</math>-T-11'-COOH</b>                  | <b><math>\alpha</math>-TE-12a'/13'-CH<sub>2</sub>OH/COOH</b>    |
|                                                       |                                      |                                                        |                                                                 |
|                                                       | <b><math>\alpha</math>-T-5'-COOH</b> | <b><math>\alpha</math>-TE-11'-COOH</b>                 |                                                                 |
|                                                       |                                      |                                                        |                                                                 |

<sup>a</sup>The nomenclature of structurally related compounds follows this principle.

**Table S3. Conditions for the quantification of 27a and its metabolites by UPLC-MS/MS**

| Metabolite                                                | Transition                         | Collision energy [eV] | External standard                                         | Lower limit of quantitation [nM] <sup>a</sup> |
|-----------------------------------------------------------|------------------------------------|-----------------------|-----------------------------------------------------------|-----------------------------------------------|
| $\alpha$ -TE-12a',13'-diCH <sub>2</sub> OH ( <b>27a</b> ) | 455 $\rightarrow$ 135              | -55                   | $\alpha$ -TE-12a',13'-diCH <sub>2</sub> OH ( <b>27a</b> ) | 0.2                                           |
|                                                           | 455 $\rightarrow$ 163 <sup>b</sup> | -45                   |                                                           |                                               |
|                                                           | 455 $\rightarrow$ 438              | -35                   |                                                           |                                               |
| $\alpha$ -TE-12a',13'-diCH <sub>2</sub> OH (sulfate)      | 535 $\rightarrow$ 163 <sup>b</sup> | -55                   | $\alpha$ -TE-12a',13'-diCH <sub>2</sub> OH ( <b>27a</b> ) | /                                             |
|                                                           | 535 $\rightarrow$ 243              | -45                   |                                                           |                                               |
| $\alpha$ -TE-12a'/13'-CH <sub>2</sub> OH/COOH             | 469 $\rightarrow$ 163              | -55                   | $\alpha$ -TE-12a',13'-diCH <sub>2</sub> OH ( <b>27a</b> ) | /                                             |
| $\alpha$ -TE-11'-COOH                                     | 413 $\rightarrow$ 163              | -55                   | $\alpha$ -TE-12a',13'-diCH <sub>2</sub> OH ( <b>27a</b> ) | /                                             |
| $\alpha$ -TE-9'-COOH                                      | 385 $\rightarrow$ 163              | -55                   | $\alpha$ -TE-12a',13'-diCH <sub>2</sub> OH ( <b>27a</b> ) | /                                             |
| $\alpha$ -TE-7'-COOH                                      | 345 $\rightarrow$ 163              | -38                   | $\alpha$ -TE-12a',13'-diCH <sub>2</sub> OH ( <b>27a</b> ) | /                                             |
| $\alpha$ -TE-5'-COOH                                      | 317 $\rightarrow$ 163              | -38                   | $\alpha$ -TE-12a',13'-diCH <sub>2</sub> OH ( <b>27a</b> ) | /                                             |
| $\alpha$ -T-13'-COOH (sulfate)                            | 539 $\rightarrow$ 163              | -46                   | $\alpha$ -T-13'-COOH ( <b>12a</b> ) <sup>c</sup>          | 1 <sup>c</sup>                                |

<sup>a</sup>signal-to-noise ratio  $\geq 3$ . <sup>b</sup>transition used for quantitation. <sup>c</sup>analyzed according to Pein et al.<sup>4</sup>

SI SCHEMES

Scheme S1. SARs on cell-free 5-LOX inhibition<sup>a</sup>

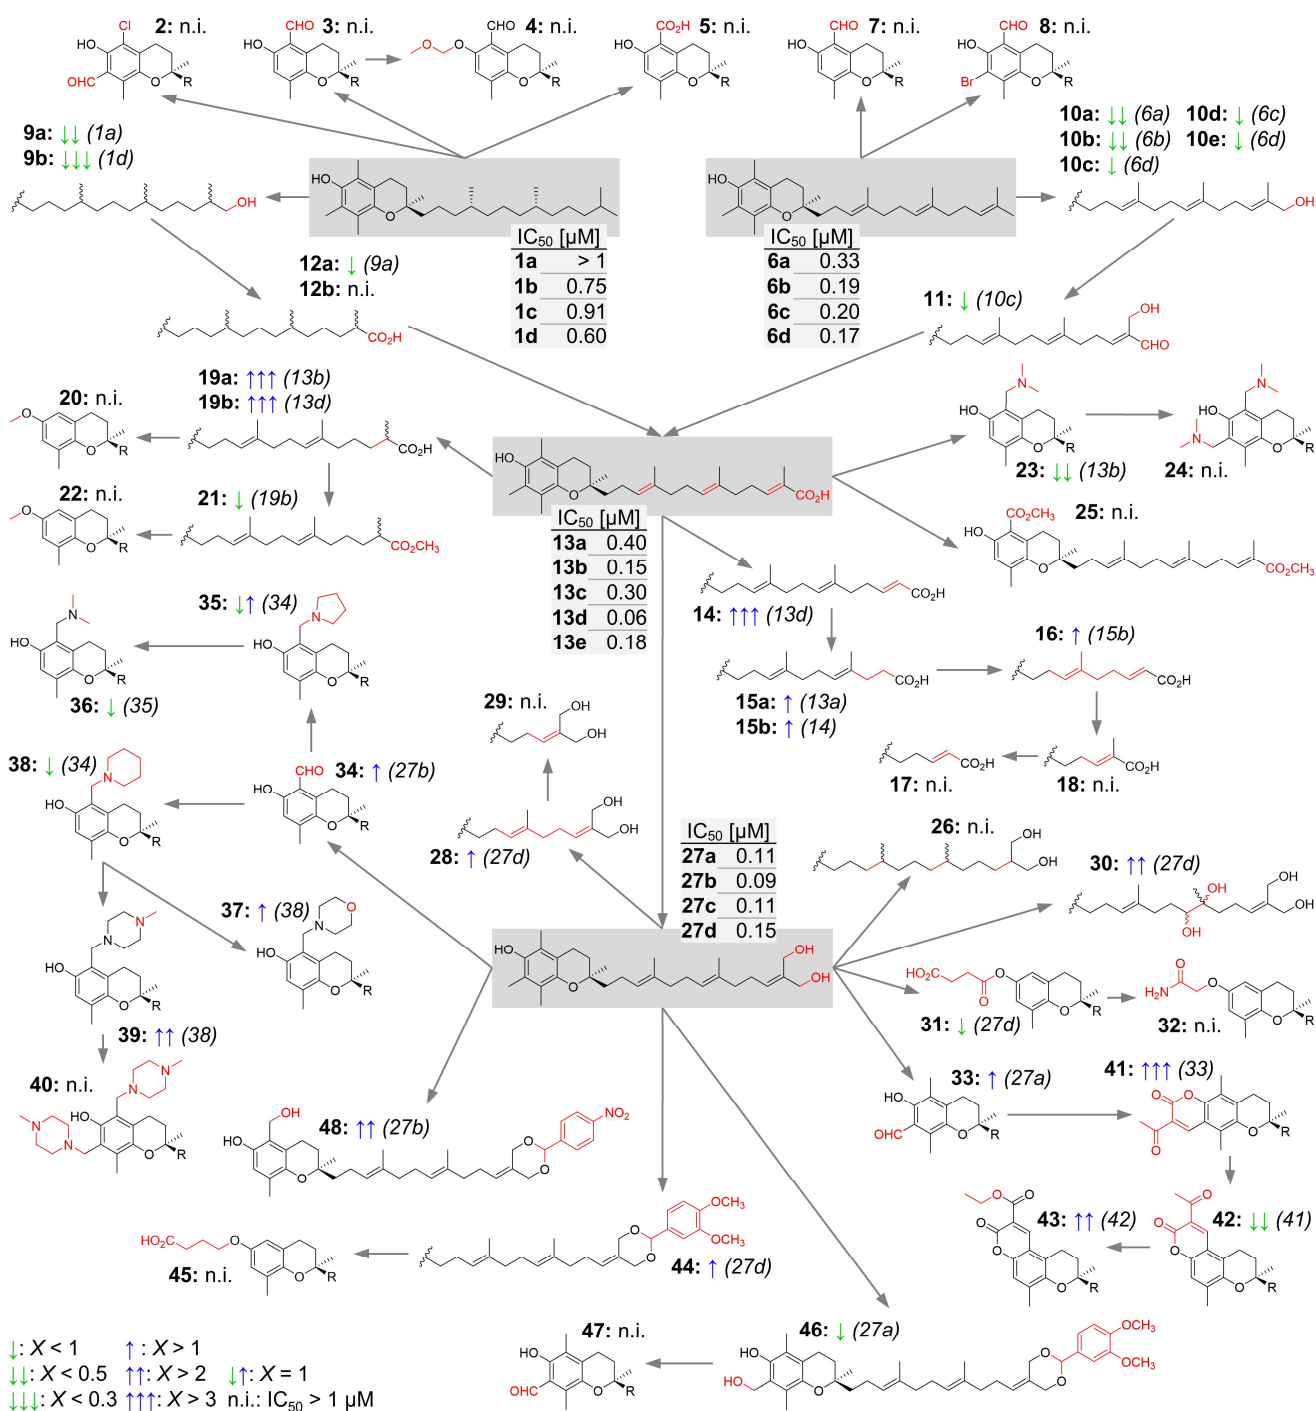

<sup>a</sup>Fold-changes in IC<sub>50</sub> values compared to the structurally parental compound (indicated in brackets) are visualized in the scheme by green downward (decreased IC<sub>50</sub>) and blue upward arrows (increased IC<sub>50</sub>) as indicated in the legend. R indicates that the side-chain is identical between parental and daughter compounds that are connected by an arrow. n.i., no inhibition.

**Scheme S2. SARs on the inhibition of 5-LOX product formation in PMNL<sup>a</sup>**

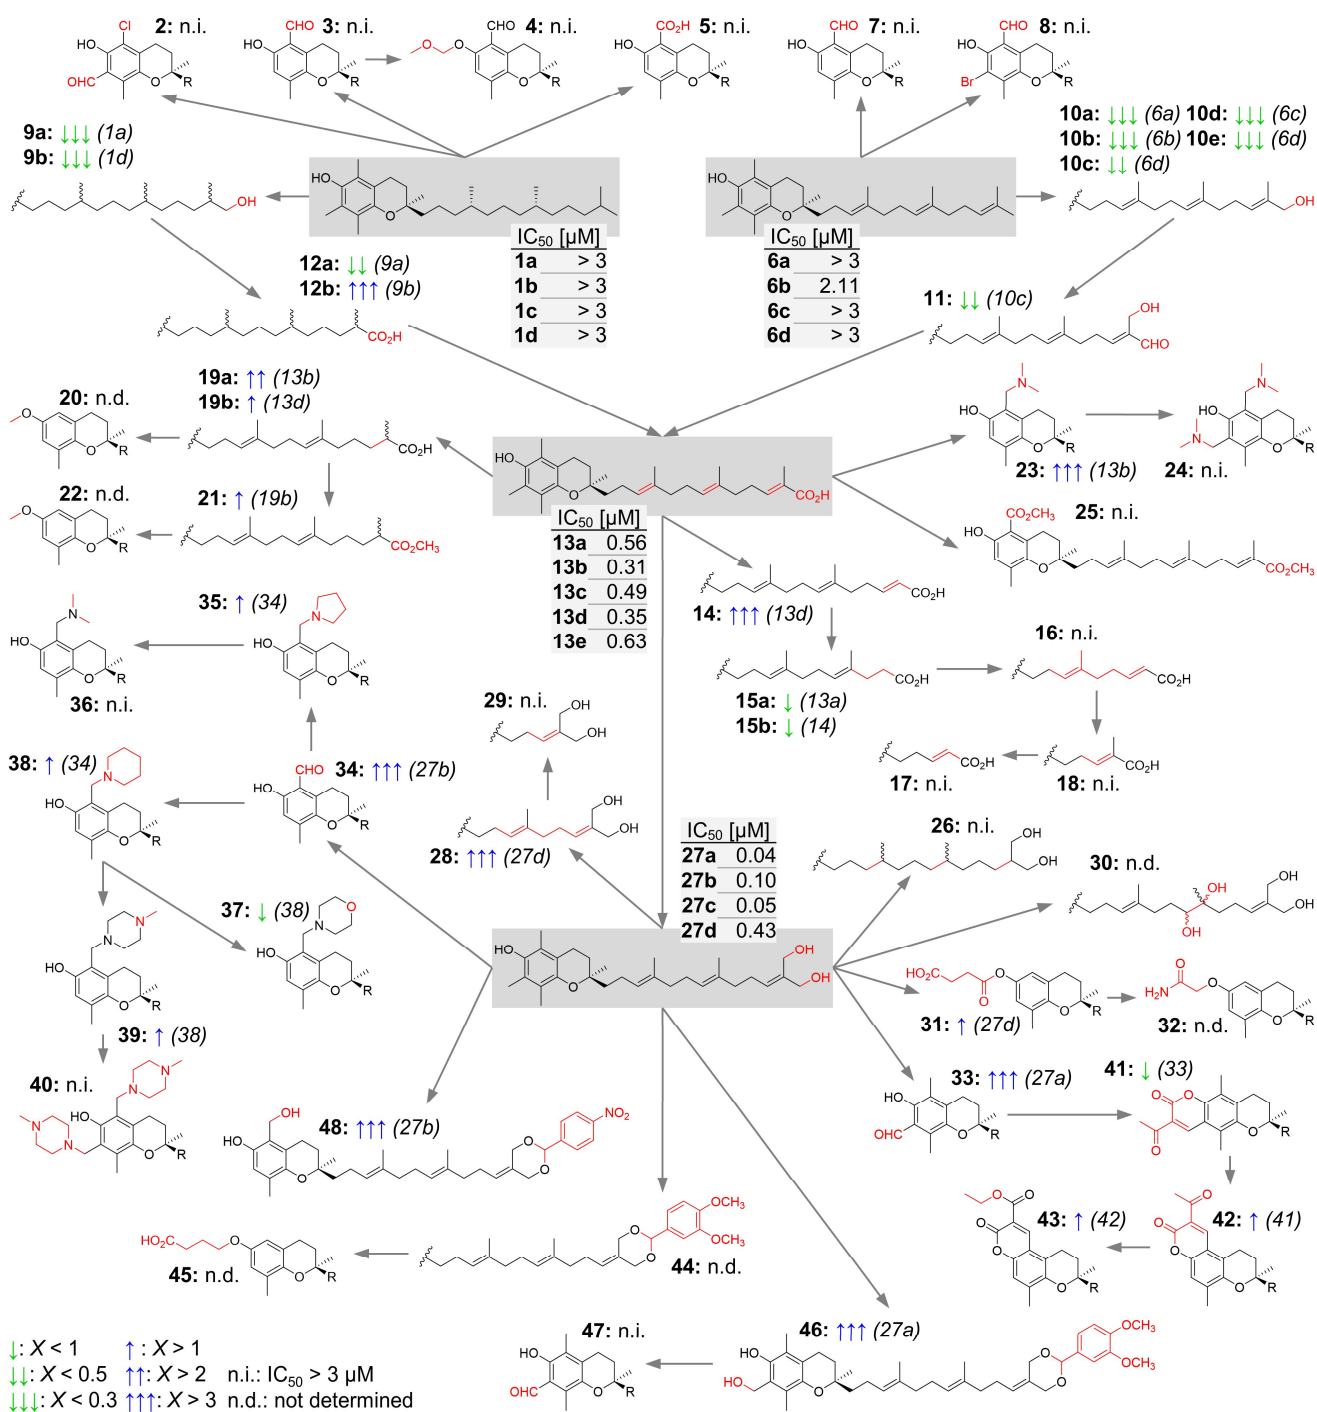

<sup>a</sup>Fold-changes in IC<sub>50</sub> values compared to the structurally parental compound (indicated in brackets) are visualized in the scheme by green downward (decreased IC<sub>50</sub>) and blue upward arrows (increased IC<sub>50</sub>) as indicated in the legend. R indicates that the side-chain is identical between parental and daughter compounds that are connected by an arrow. n.i., no inhibition; n.d., not determined.

## SI FIGURES

### 5-LOX (enzyme)

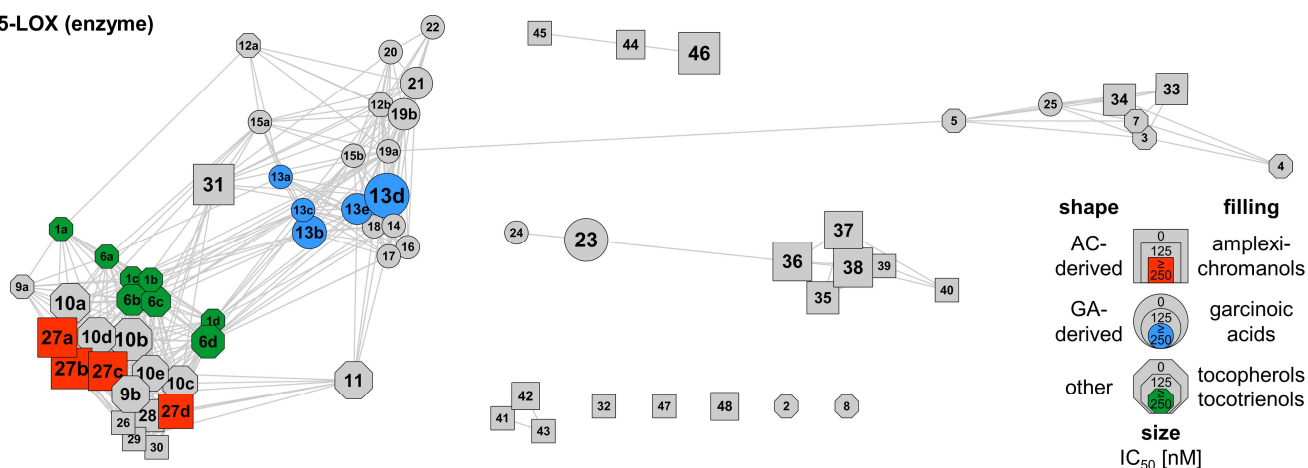

**Figure S1. Correlation network of the compound library for inhibition of cell-free 5-LOX.**

The network visualizes structural similarity between compounds calculated using Tanimoto similarity. Nodes represent individual compounds and connecting edges represent Tanimoto coefficients > 0.9. The node shape differentiates between derivatives derived from amplexichromanols (AC), garcinoic acids (GA), or other leads, and the filling highlights the parental series, i.e. amplexichromanol (red), garcinoic acid (blue), tocopherol and tocotrienol (green). The node size reflects the potency ( $IC_{50}$  values) of the compound to inhibit 5-LOX product formation in cell-free assays.

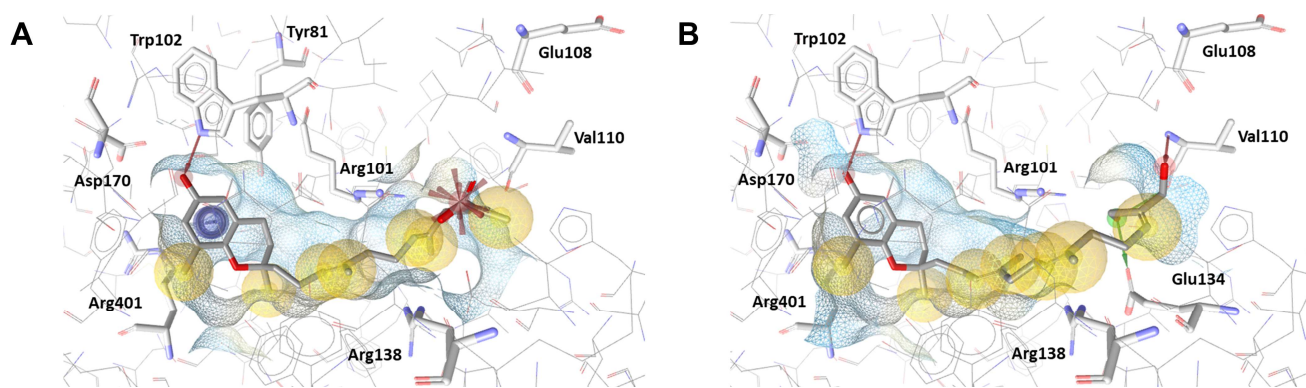

**Figure S2. Molecular docking simulation of 5-LOX.**

(A-B) Proposed interaction of **13d** (A) and **27d** (B) with 5-LOX at the interface of the catalytic and regulatory C2-like domain.

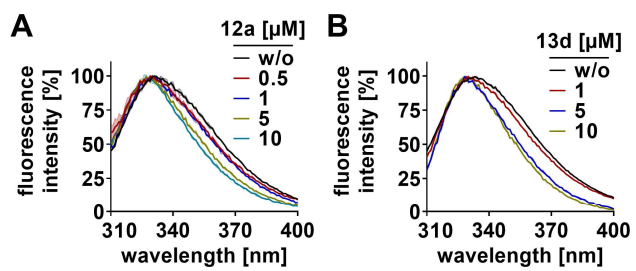

**Figure S3. Fluorescence spectroscopic analysis of 5-LOX ligand interactions.**

(A, B) Fluorescence excitation spectra as percentage of maximum fluorescence intensity shown for 5-LOX titrated with **12a** (A) and **13d** (B). Data are expressed as mean  $\pm$  SEM (transparent area) from  $n = 2$  independent experiments.



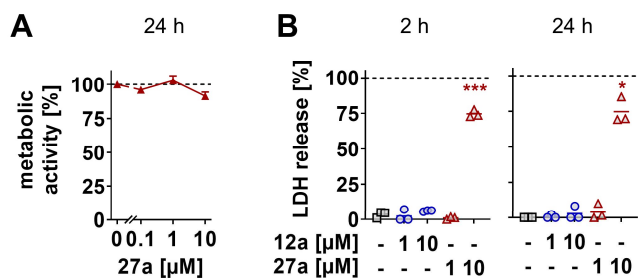

**Figure S4. Effect of 27a on human monocyte and PBMC viability.**

PBMC (A) or monocytes (B) were treated with **27a** or **12a** for 24 h (A, B) or 2 h (B). (A) Mitochondrial dehydrogenase activity analyzed by MTT assay. (B) Membrane integrity measured as LDH release into the culture medium. Data are expressed as mean + SEM (A) or mean with single values (B) from  $n = 4$  (A),  $n = 3$  (B) independent experiments. \* $p < 0.05$ , \*\*\* $p < 0.001$  vs. control; RM one-way ANOVA + Tukey *post hoc* test.

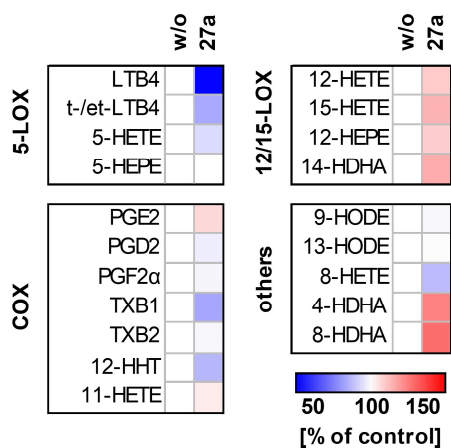

**Figure S5. Compound 27a selectively inhibits 5-LOX product formation in activated monocytes.**

Heatmap showing the effect of **27a** (1  $\mu$ M) on the lipid mediator profile in A23187/AA-treated monocytes that were pre-activated with LPS. HODE, hydroxyoctadecadienoic acid; t-/et-LTB<sub>4</sub>, LTB<sub>4</sub> isomers; TX, thromboxane. Data are expressed as percentage change to vehicle control and are given as mean from n = 3 independent experiments.

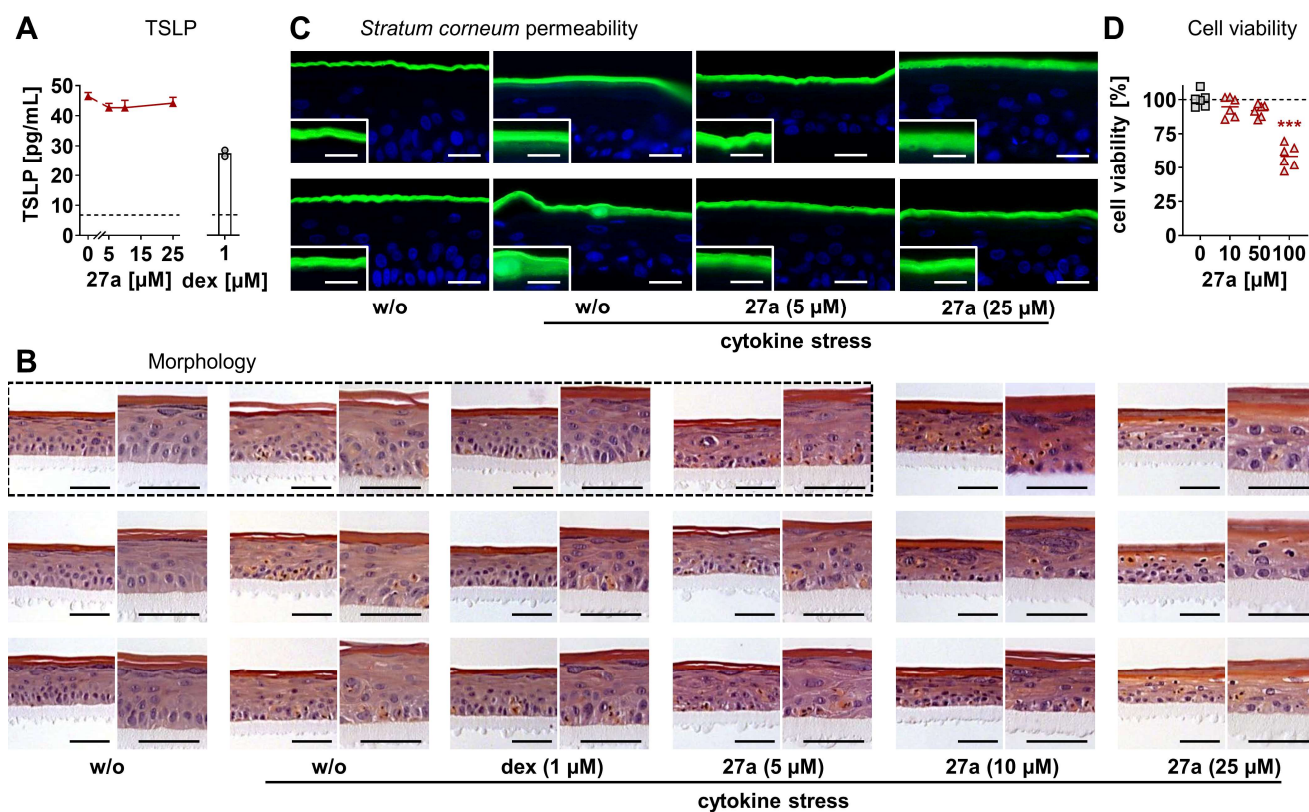

**Figure S6. Compound 27a attenuates cytokine-triggered defects in reconstructed human epidermis (RHE).**

RHE exposed to **27a** or dexamethasone (dex) was treated with a cytokine cocktail for 2 days (A) or 4 days (B-D) to trigger the inflammatory reaction. (A) Concentration of thymic stromal lymphopoietin (TSLP) in the growth medium. The dotted line indicates basal levels without cytokine stress. (B) Morphological changes visualized by hematoxylin and eosin staining (scale bar: 50  $\mu$ m). Images in the dotted box are shown in Fig. 5B. (C) Impermeability of the *stratum corneum*. The *stratum corneum* of cytokine-stressed RHE becomes permeable for Lucifer yellow (green) that diffuses into the viable cell layers, as shown in the inserts in higher magnification (scale bar outer box: 20  $\mu$ m, scale bar insert: 10  $\mu$ m; exemplary images from three independent experiments that are not shown in Fig. 5E). (D) Mitochondrial dehydrogenase activity analyzed by MTT assay. Data are expressed as mean + SEM (A, **27a**) with single values (A, dex) or mean with single values (D) from  $n = 2$  (A),  $n = 3$  (B, C) independent experiments or  $n = 6$  based on three independent experiments in biological duplicates (D). \*\*\* $p < 0.001$  vs. control; ordinary one-way ANOVA + Tukey *post hoc* test.

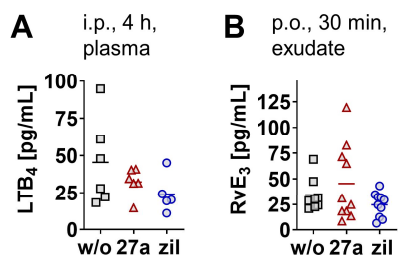

**Figure S7. Effect of 27a on resolvin (Rv)E3 and systemic LTB<sub>4</sub> levels in mice with acute peritonitis.**

Mice received **27a** (10 mg/kg, A: i.p., B: p.o.) or zileuton (zil; 10 mg/kg, A: i.p., B: p.o.) and were sacrificed 4 h (A) or 30 min (B) post zymosan injection. (A) LTB<sub>4</sub> levels in plasma analyzed by ELISA. (B) RvE3 levels in the exudate analyzed by UPLC-MS/MS. Data are expressed as mean with single values from n = 6 (A, w/o and **27a**), n = 5 (A, zil), n = 9 (B, w/o), n = 10 (B, **27a** and zil) mice. Two-tailed unpaired *t*-test of log data.

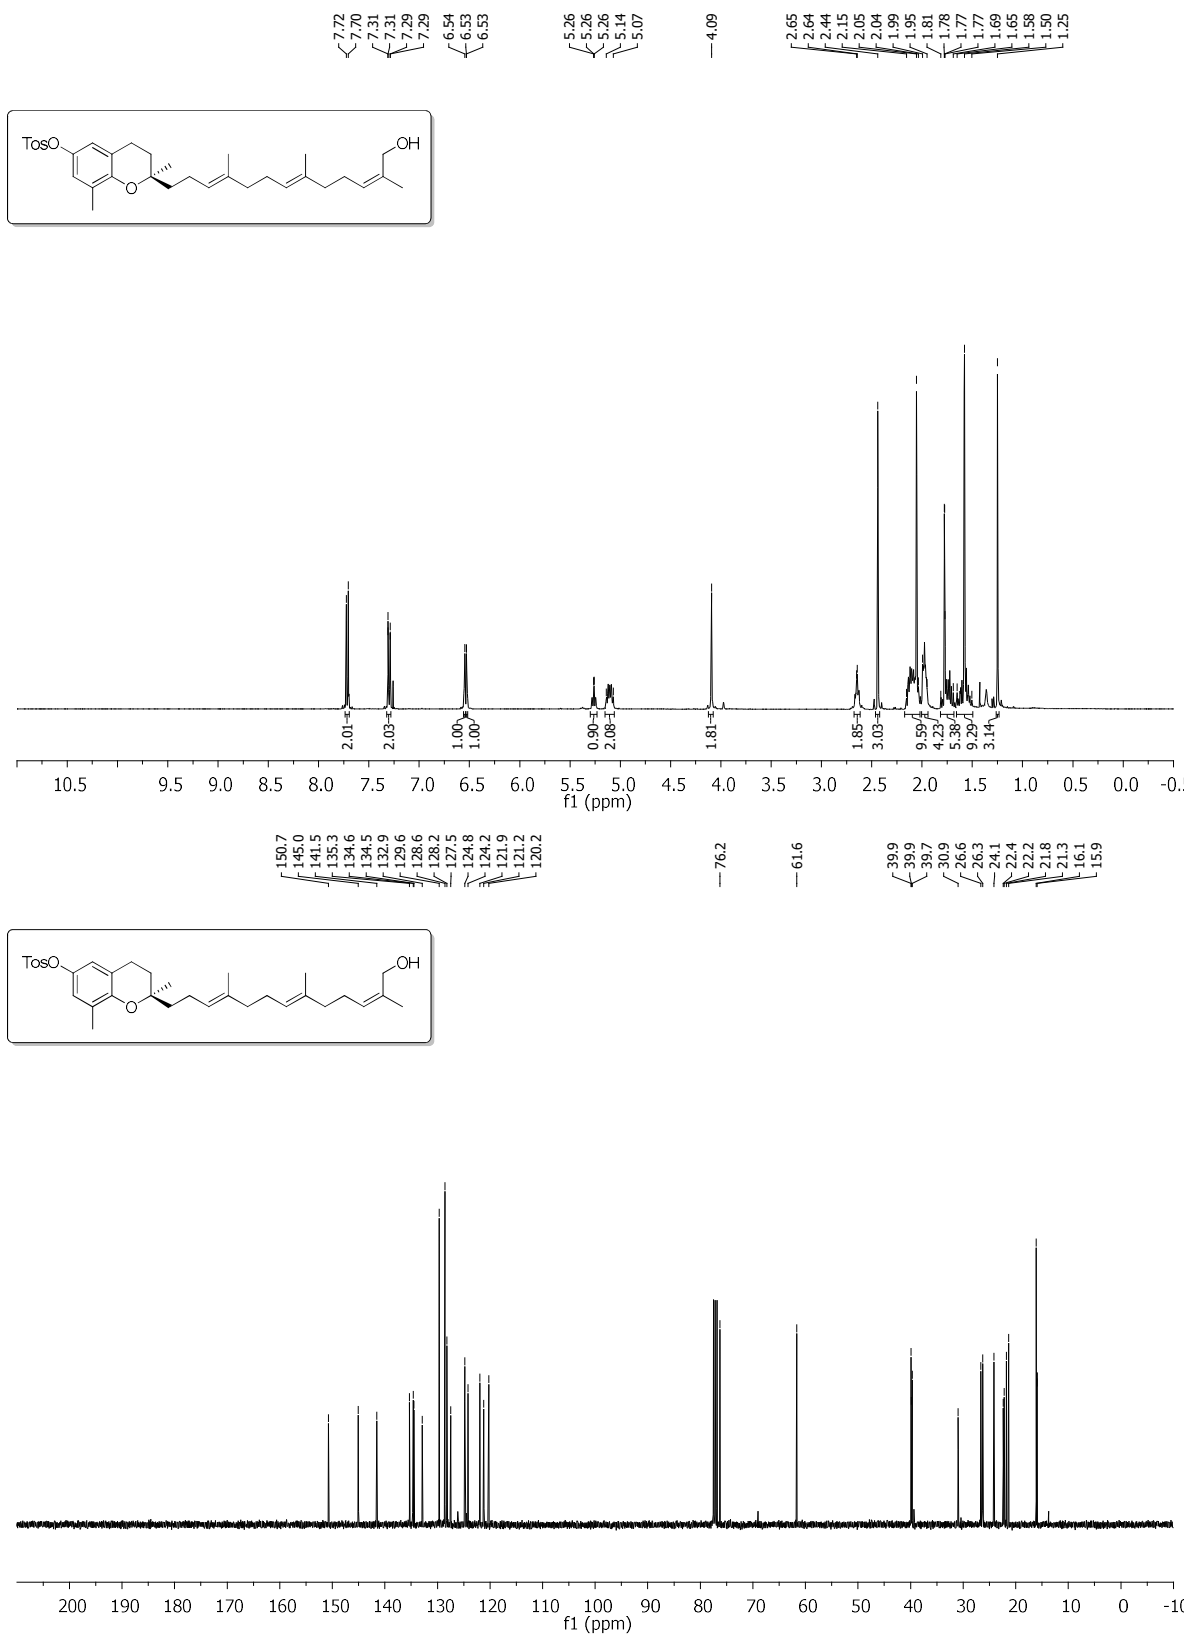

Figure S8. <sup>1</sup>H and <sup>13</sup>C NMR spectra of **49** in acetone-*d*<sub>6</sub>

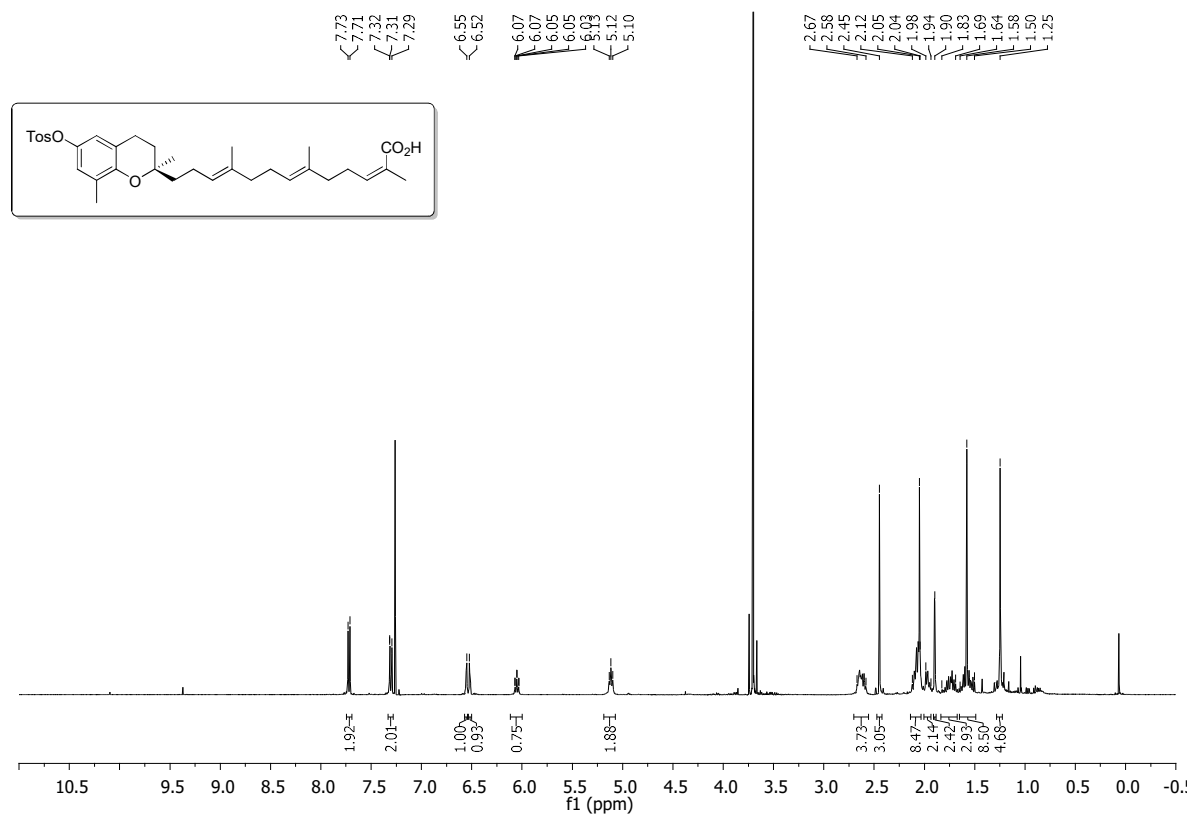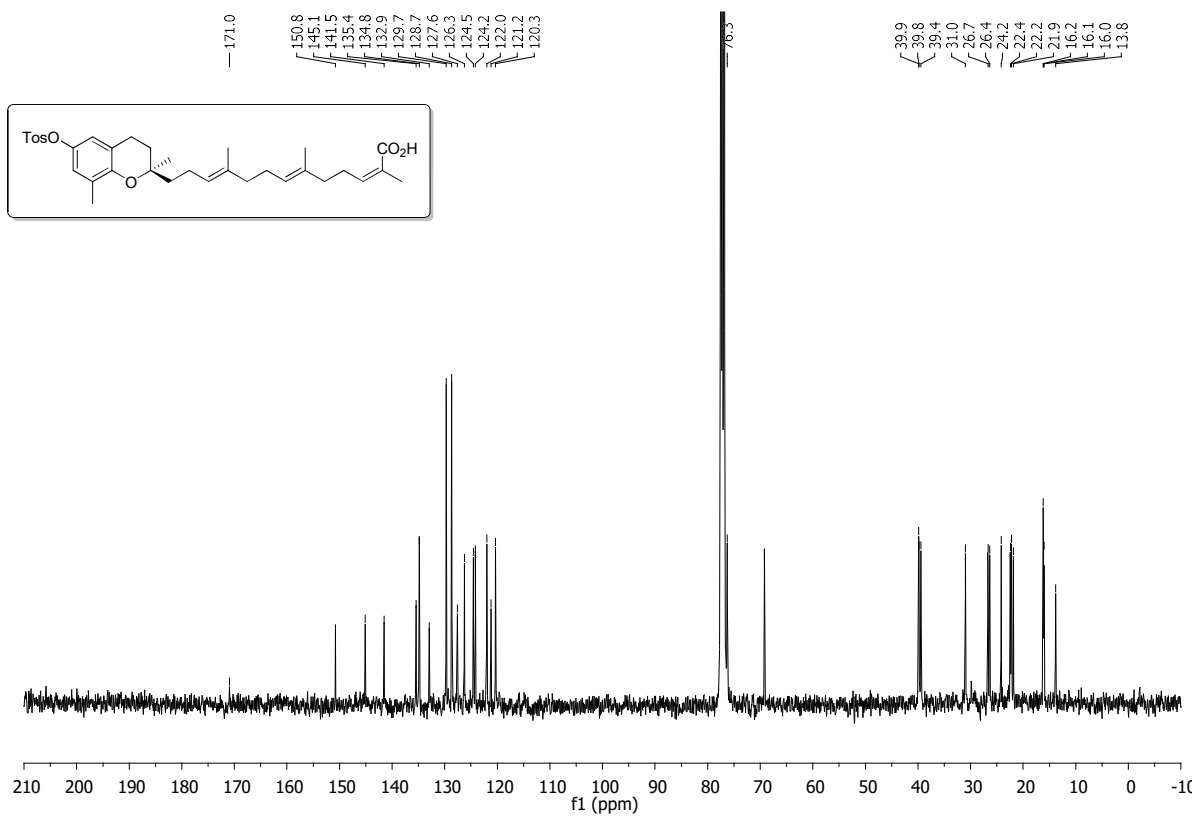

Figure S9. <sup>1</sup>H and <sup>13</sup>C NMR spectra of 50 in CDCl<sub>3</sub>

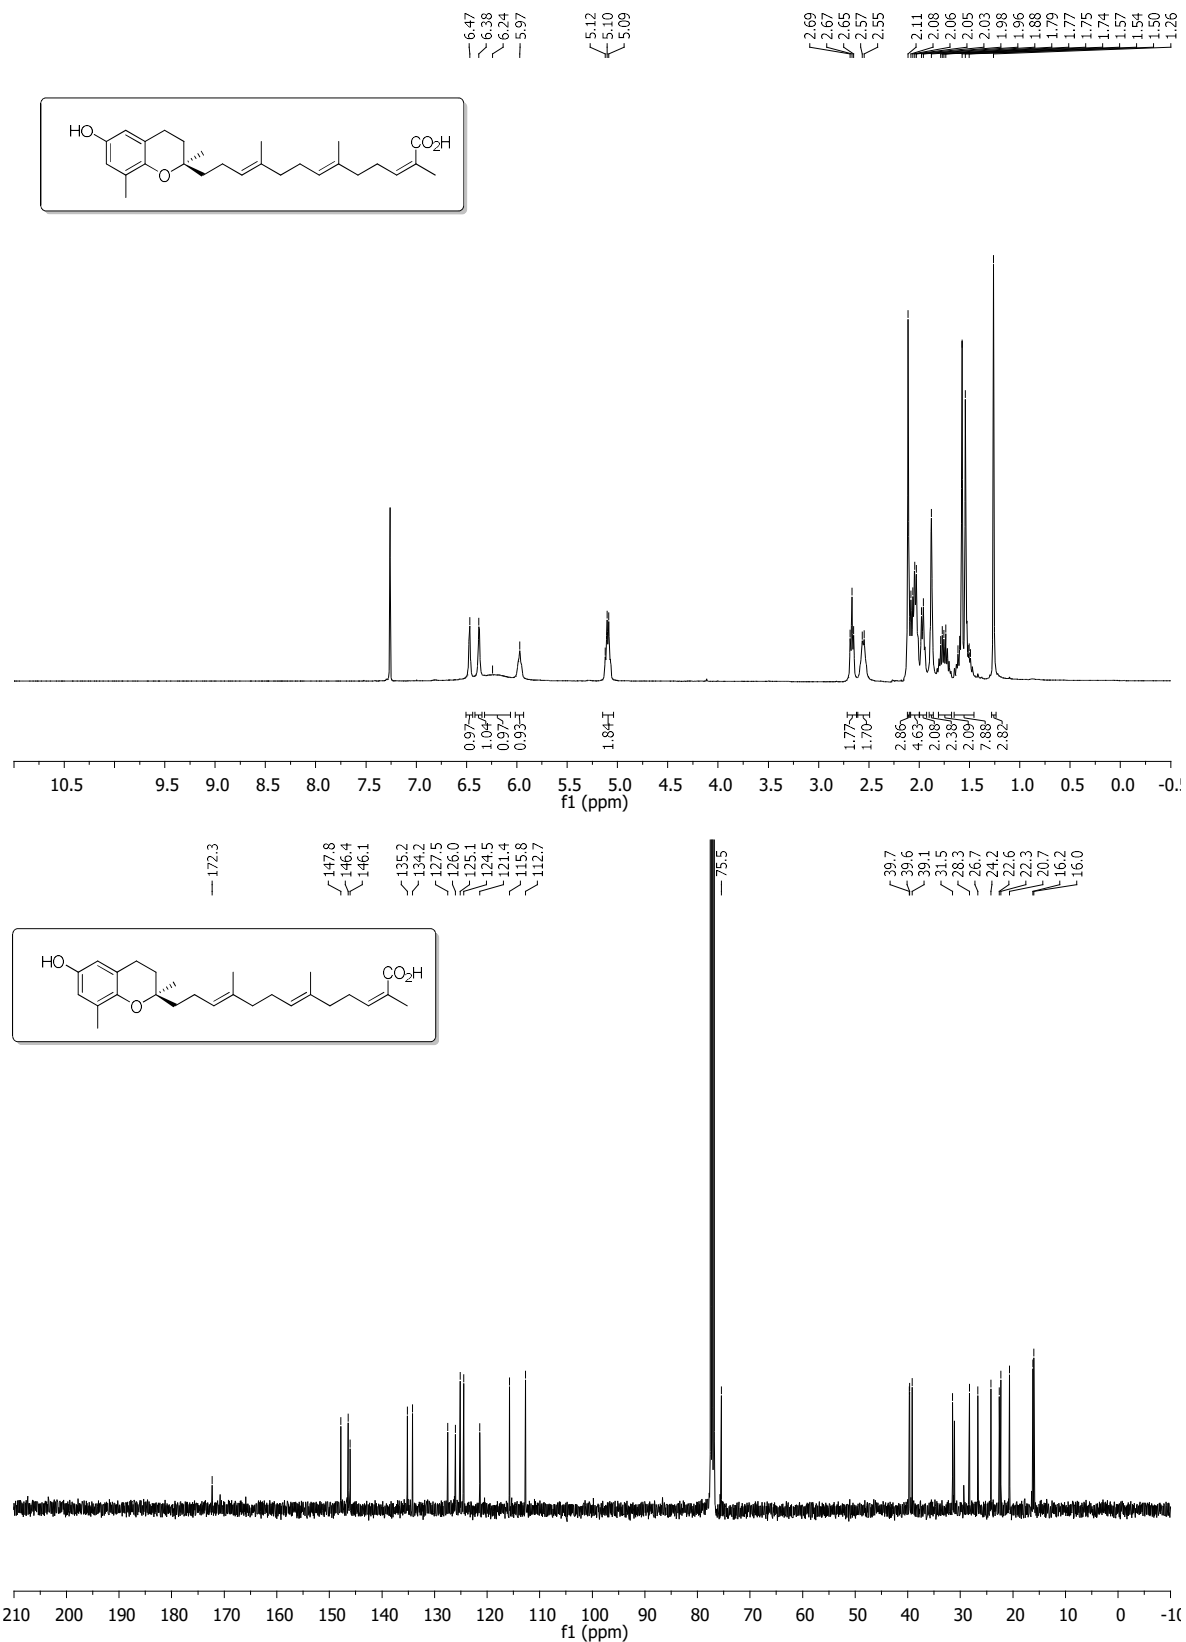

Figure S10. <sup>1</sup>H and <sup>13</sup>C NMR spectra of 13e in CDCl<sub>3</sub>

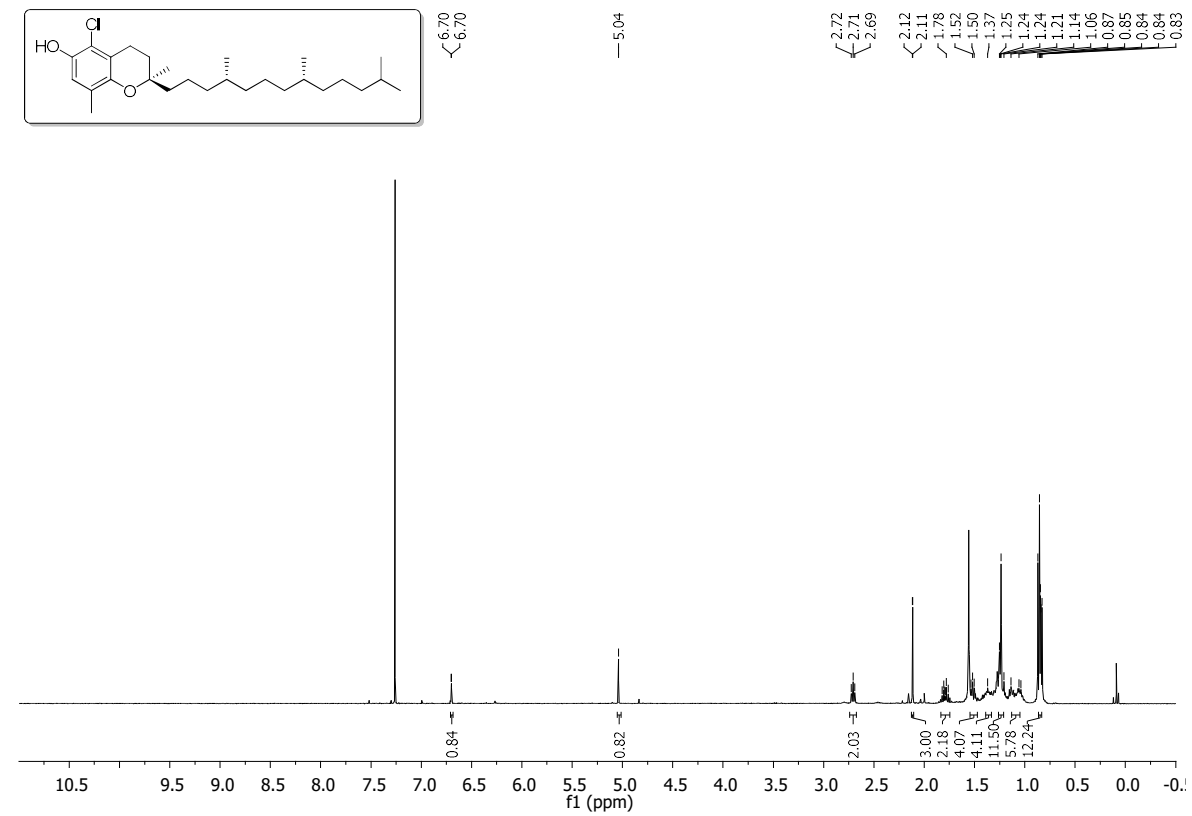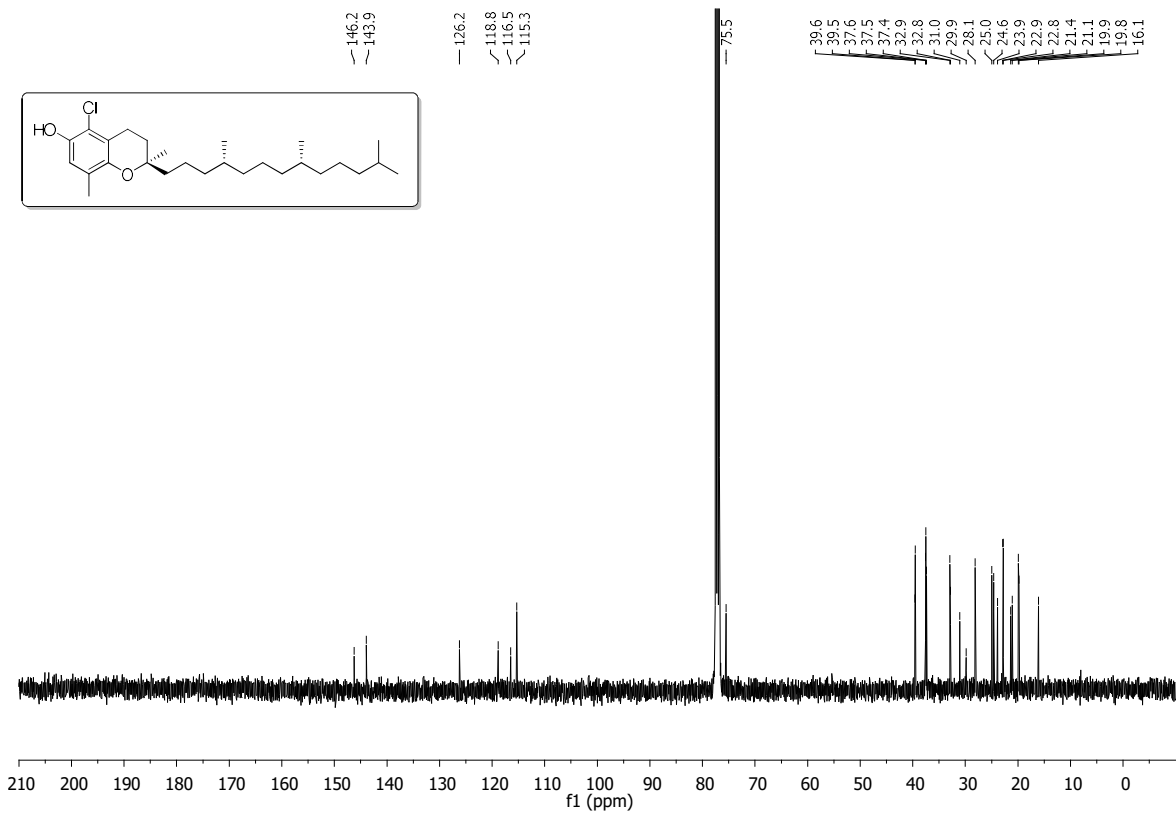

Figure S11. <sup>1</sup>H and <sup>13</sup>C NMR spectra of 51 in CDCl<sub>3</sub>



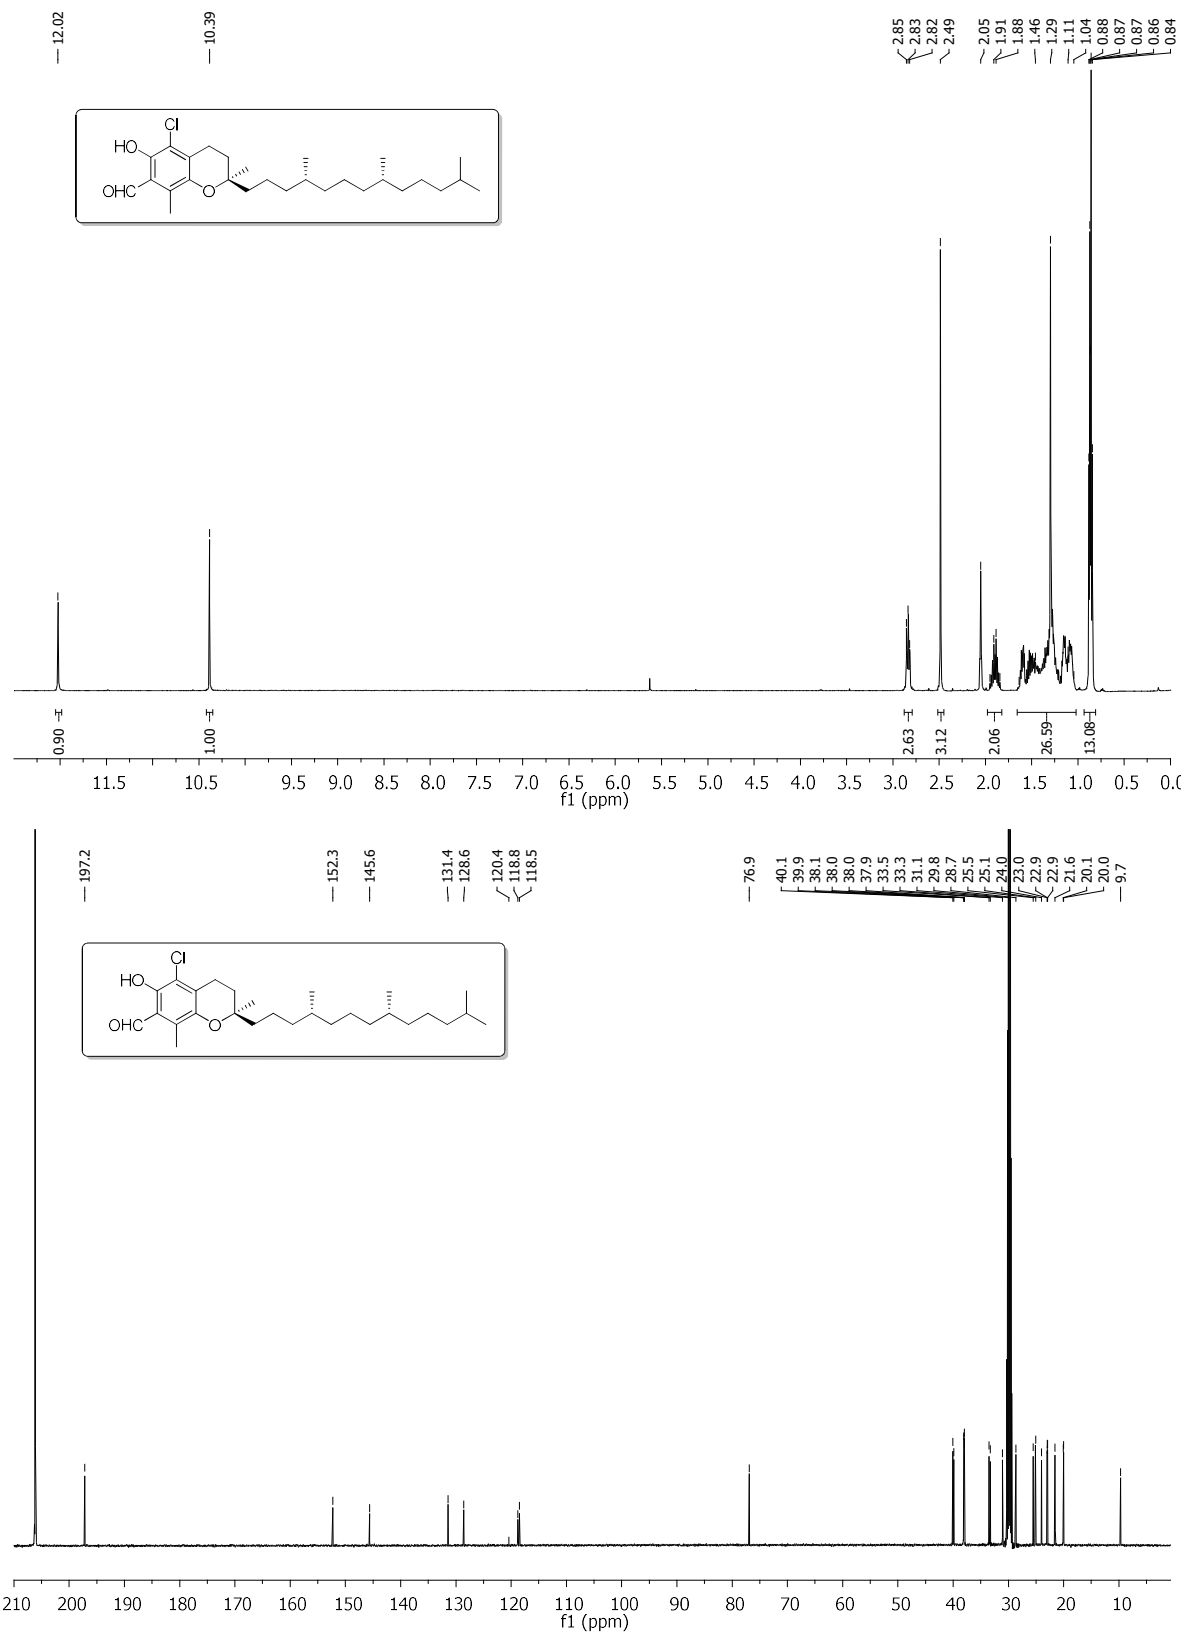

Figure S12. <sup>1</sup>H and <sup>13</sup>C NMR spectra of 2 in acetone-*d*<sub>6</sub>

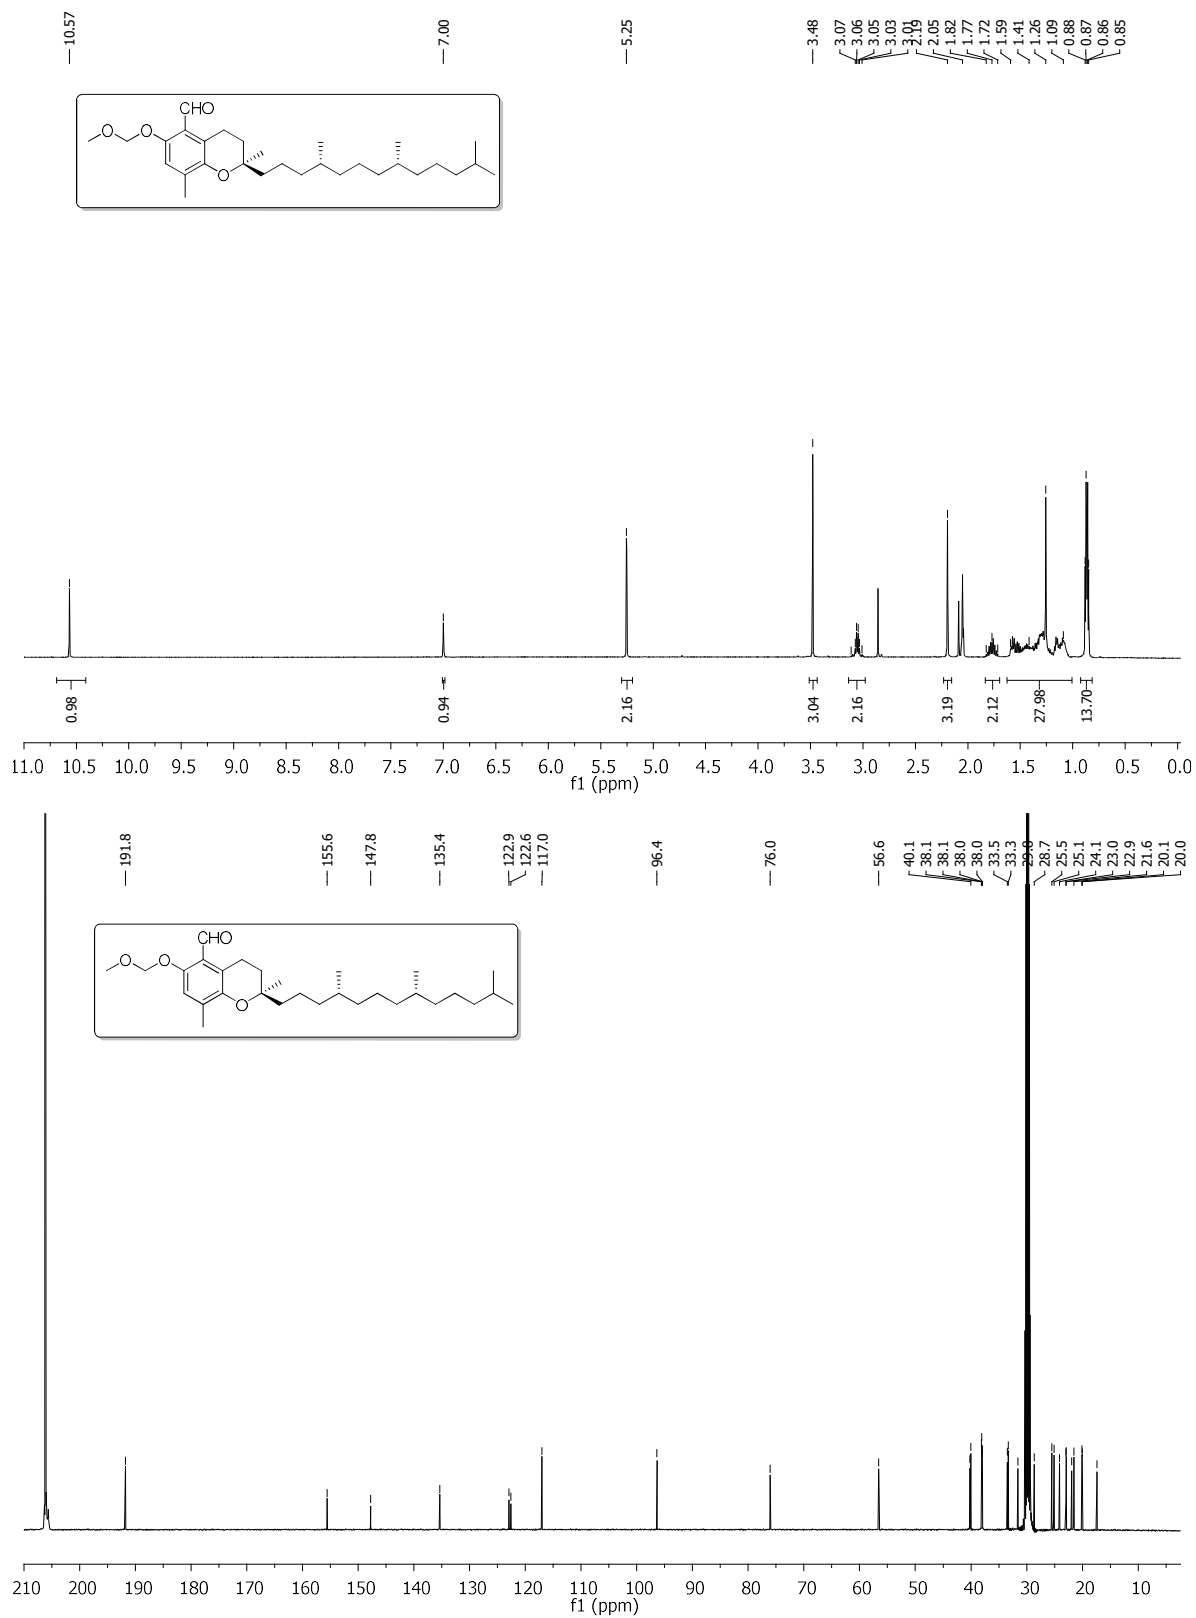

Figure S13. <sup>1</sup>H and <sup>13</sup>C NMR spectra of 4 in acetone-*d*<sub>6</sub>

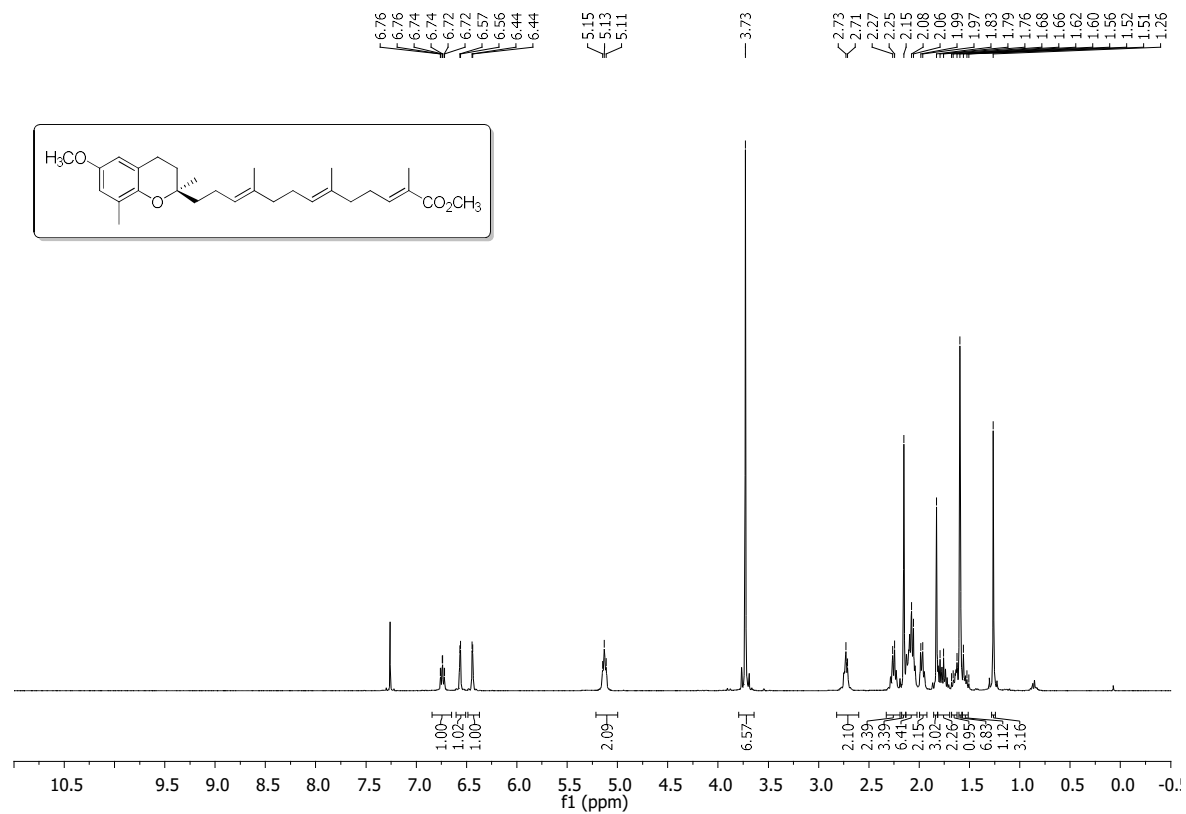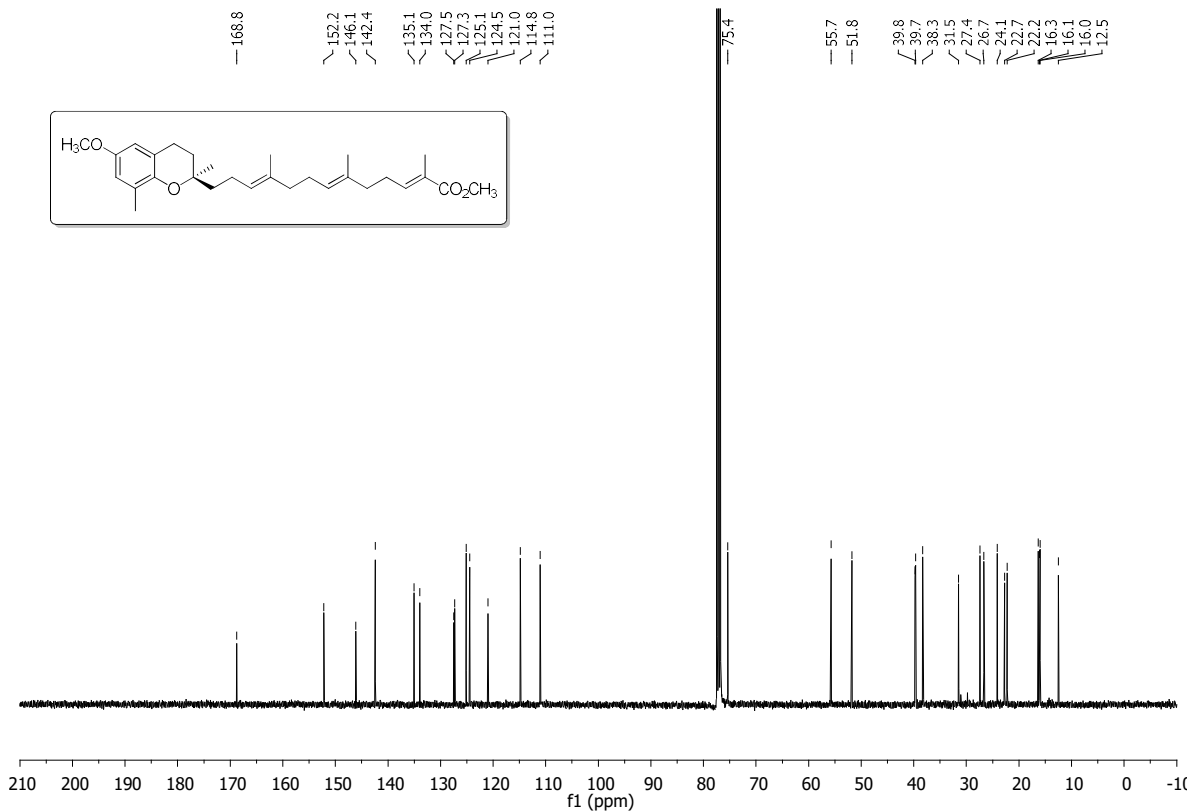

Figure S14. <sup>1</sup>H and <sup>13</sup>C NMR spectra of 53 in CDCl<sub>3</sub>



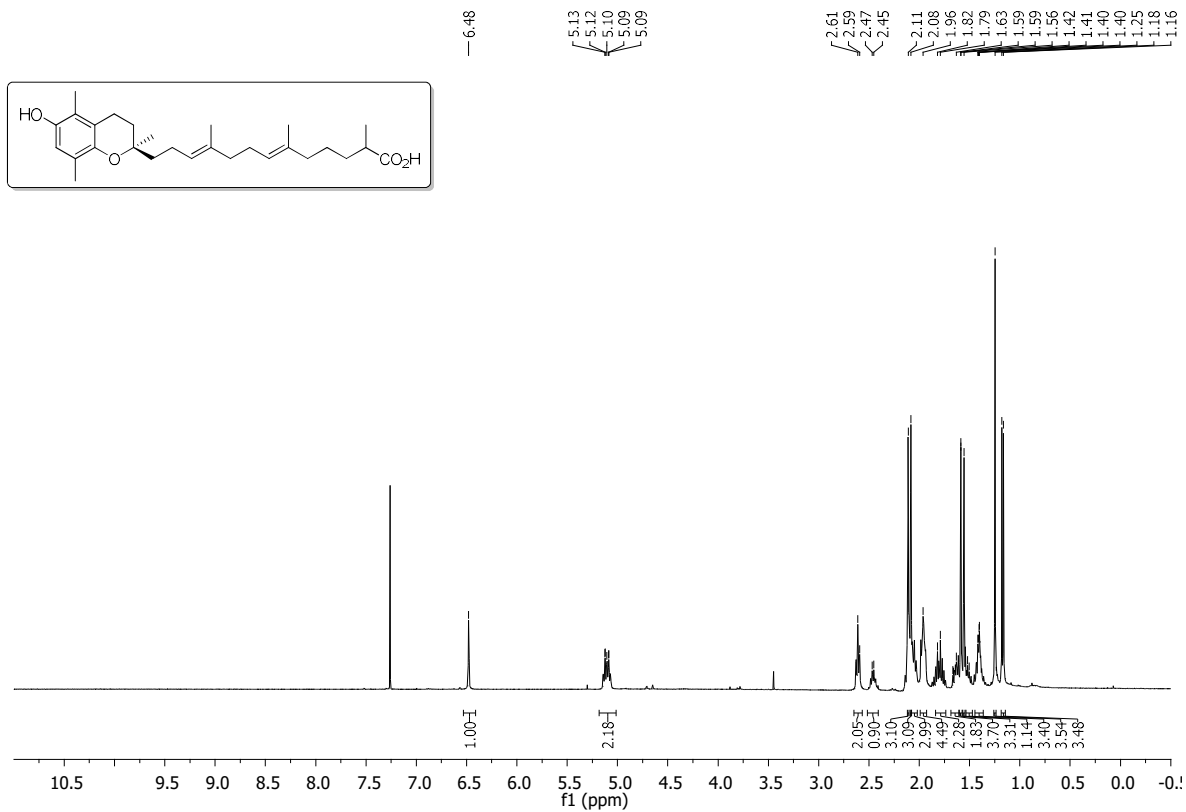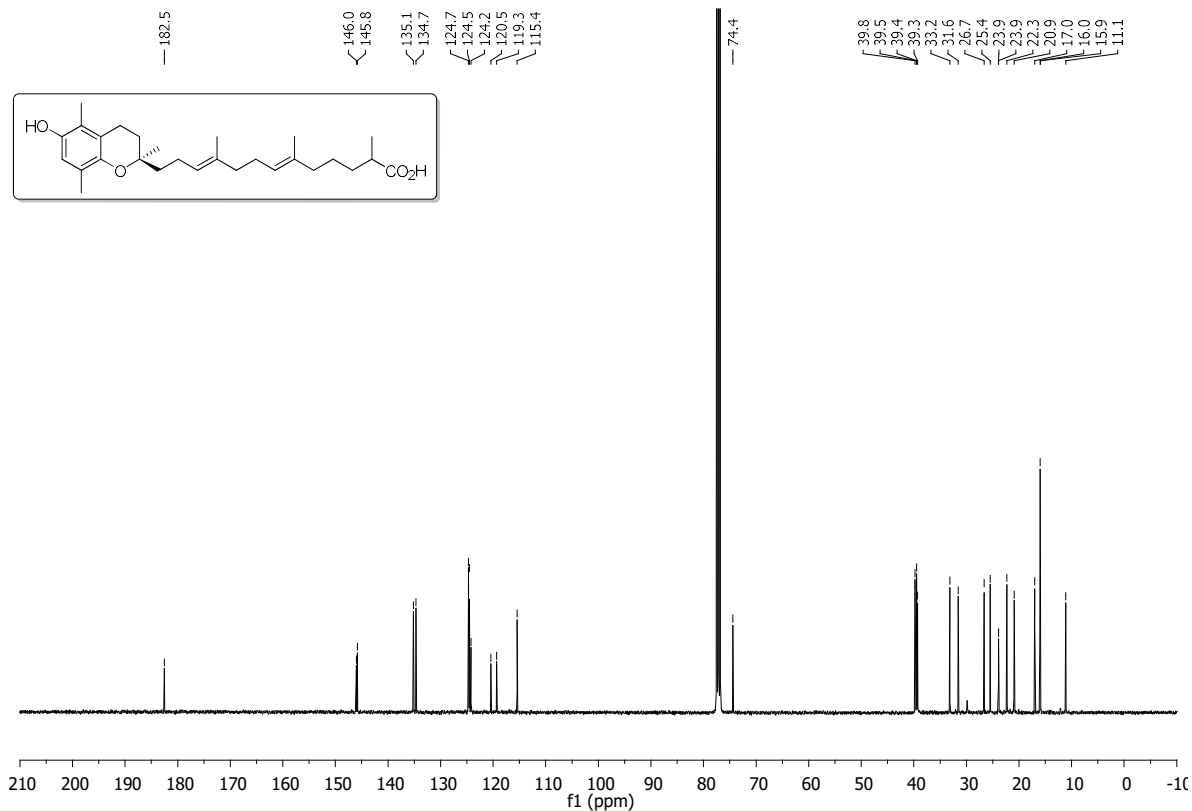

Figure S16. <sup>1</sup>H and <sup>13</sup>C NMR spectra of 19a in CDCl<sub>3</sub>

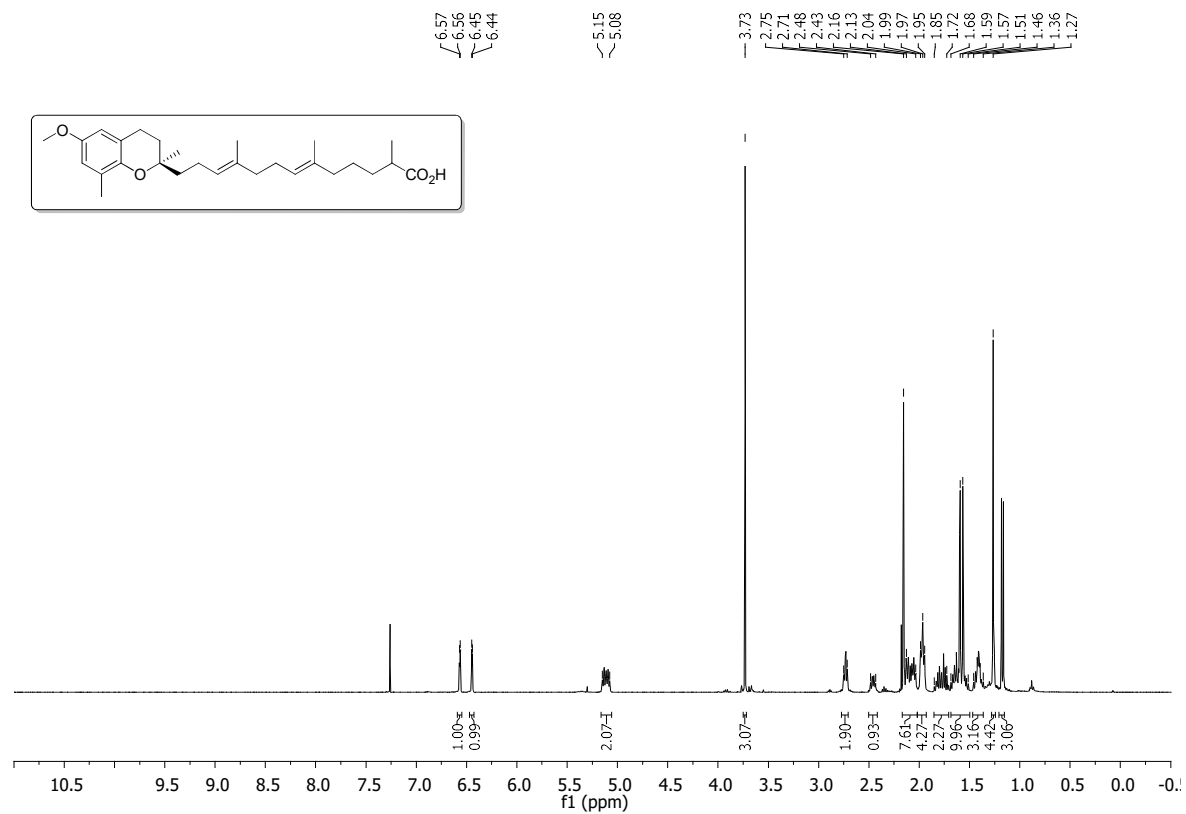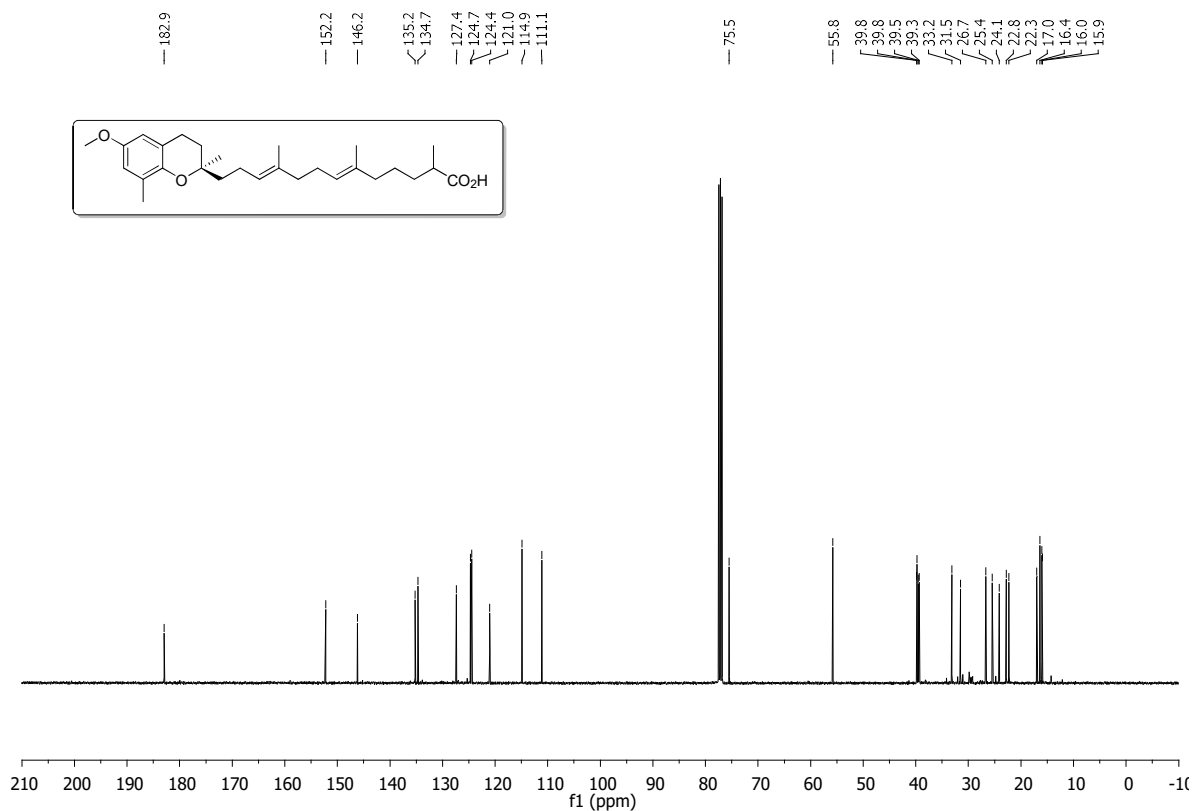

Figure S17. <sup>1</sup>H and <sup>13</sup>C NMR spectra of 20 in CDCl<sub>3</sub>



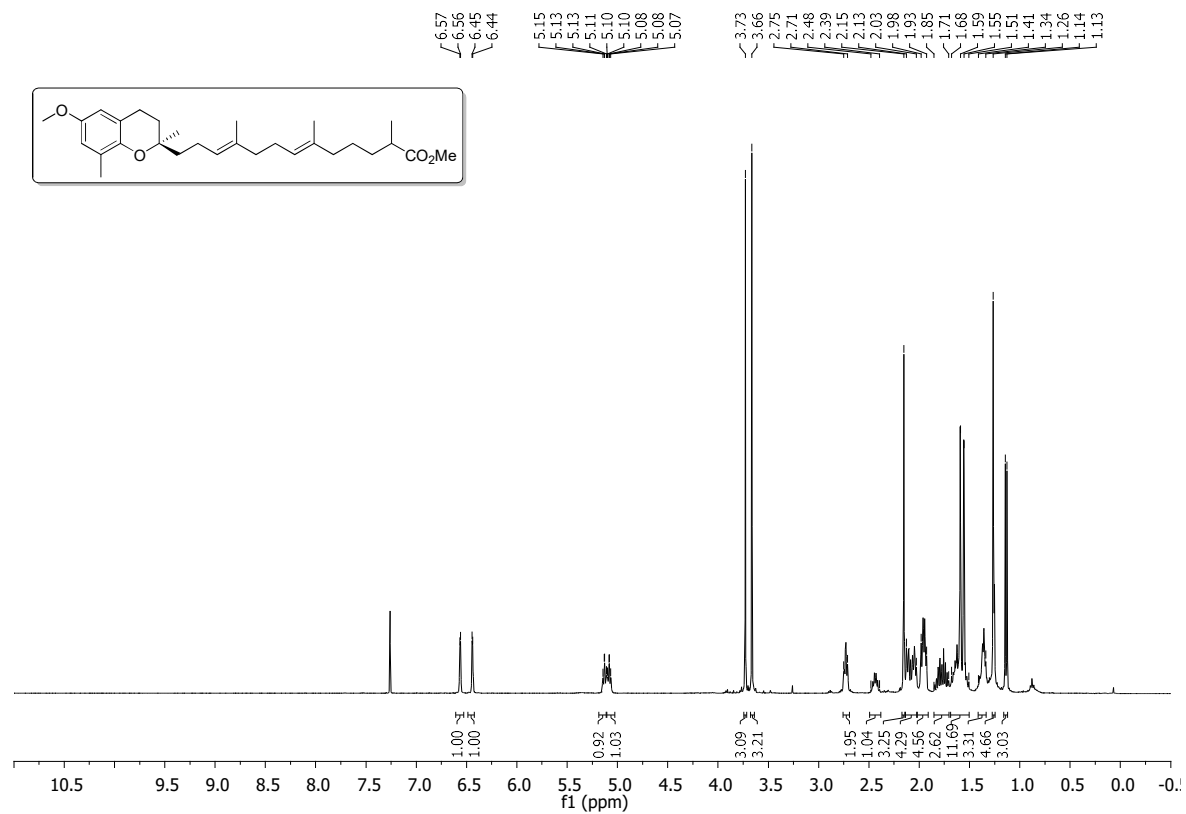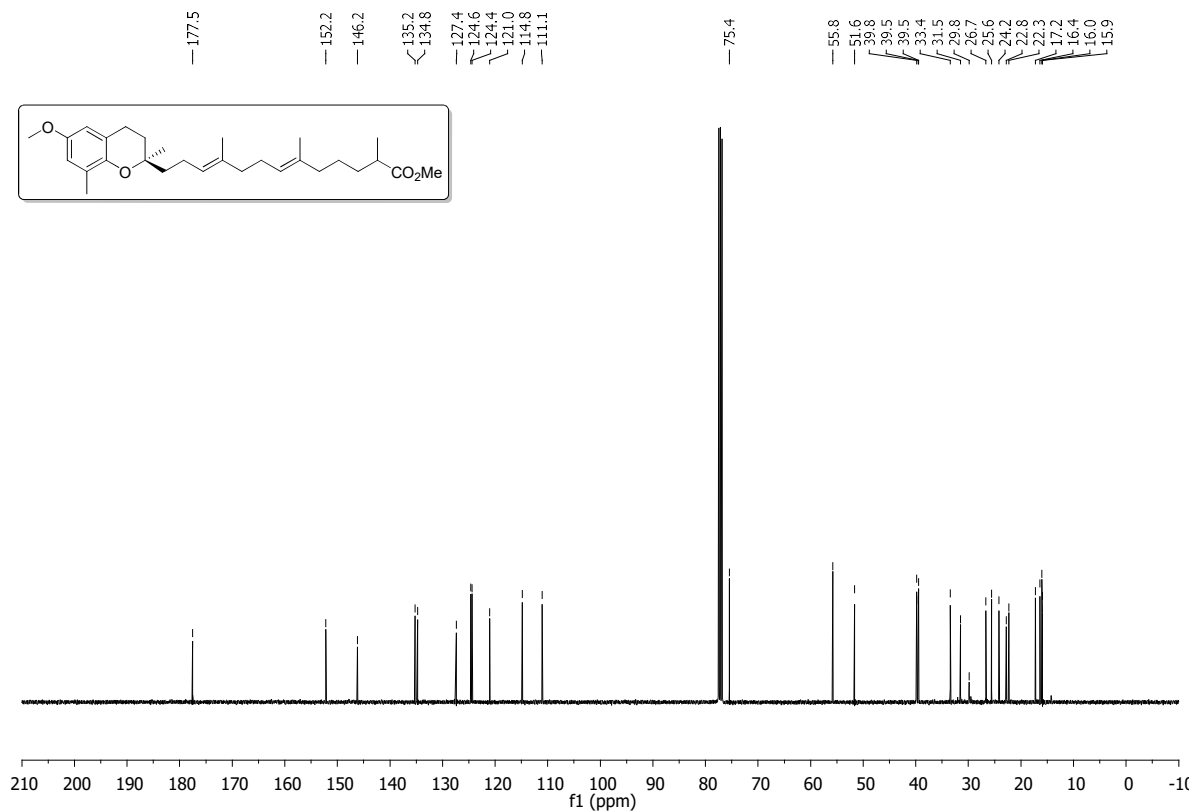

Figure S19. <sup>1</sup>H and <sup>13</sup>C NMR spectra of 22 in CDCl<sub>3</sub>.



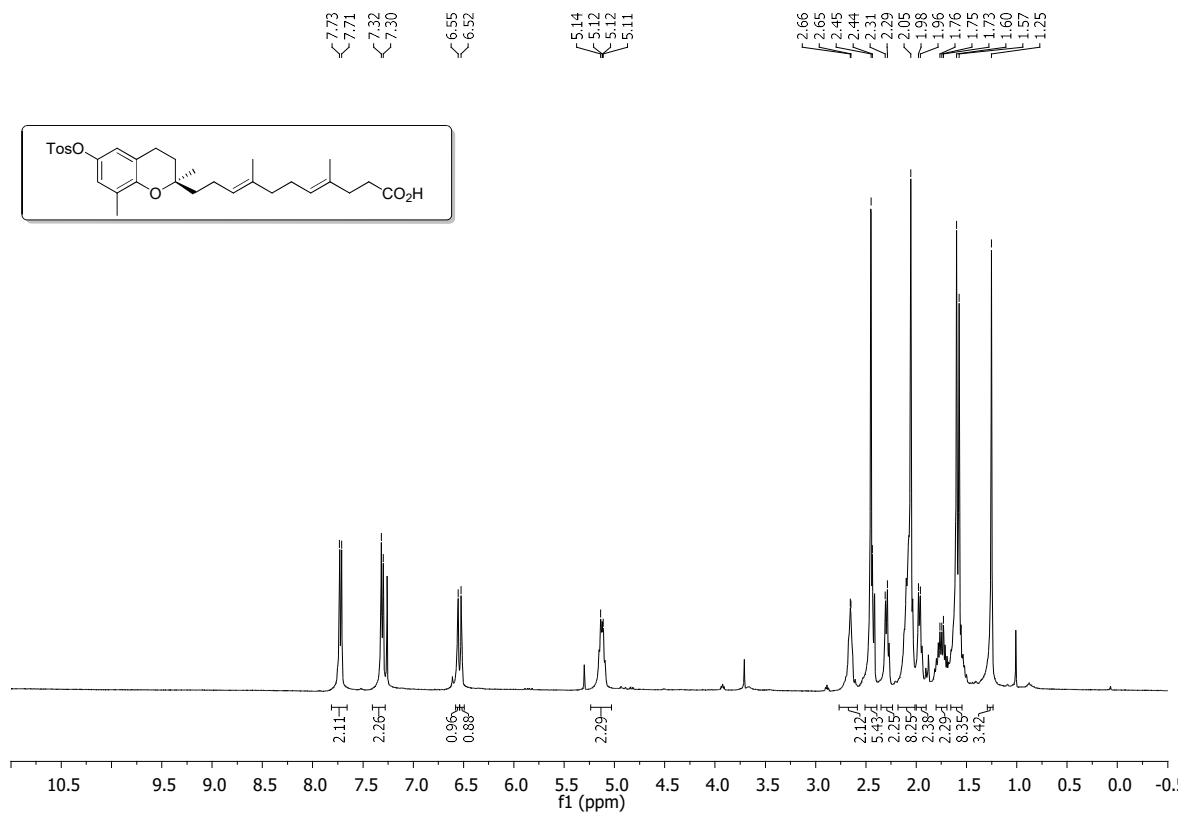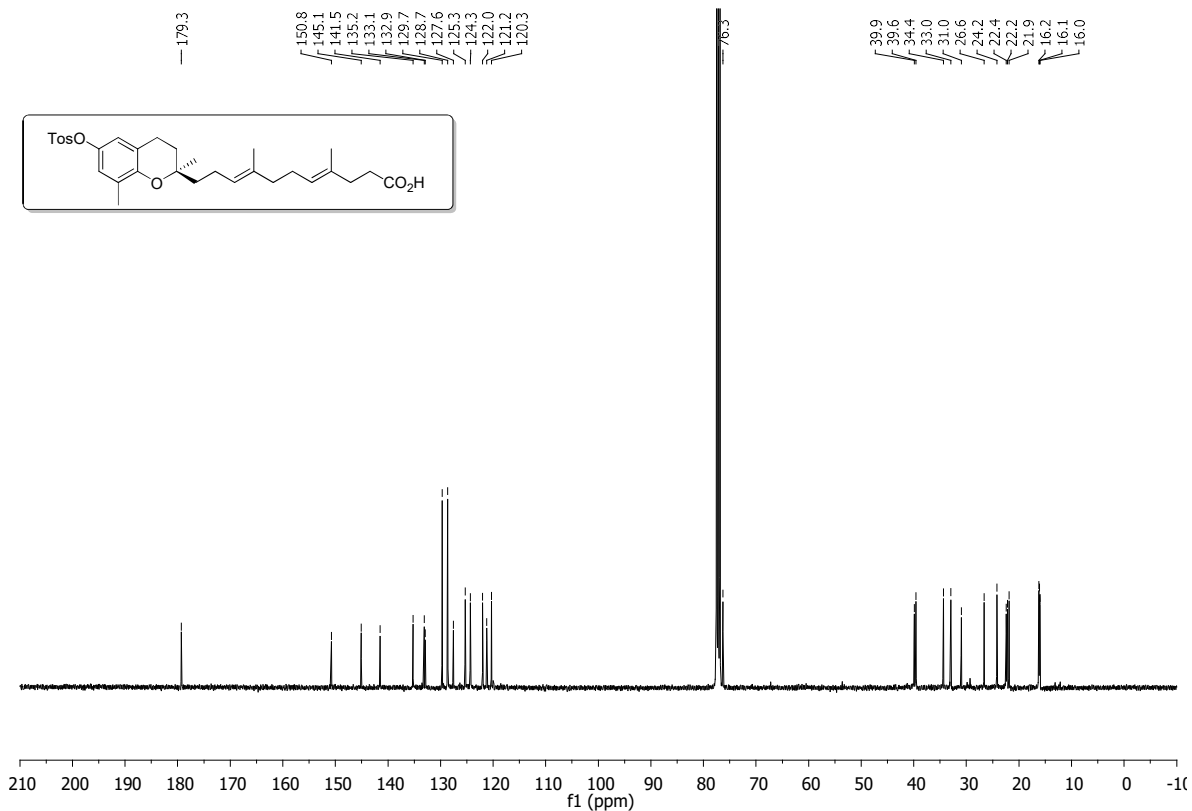

Figure S20: <sup>1</sup>H and <sup>13</sup>C NMR spectra of 55 in CDCl<sub>3</sub>

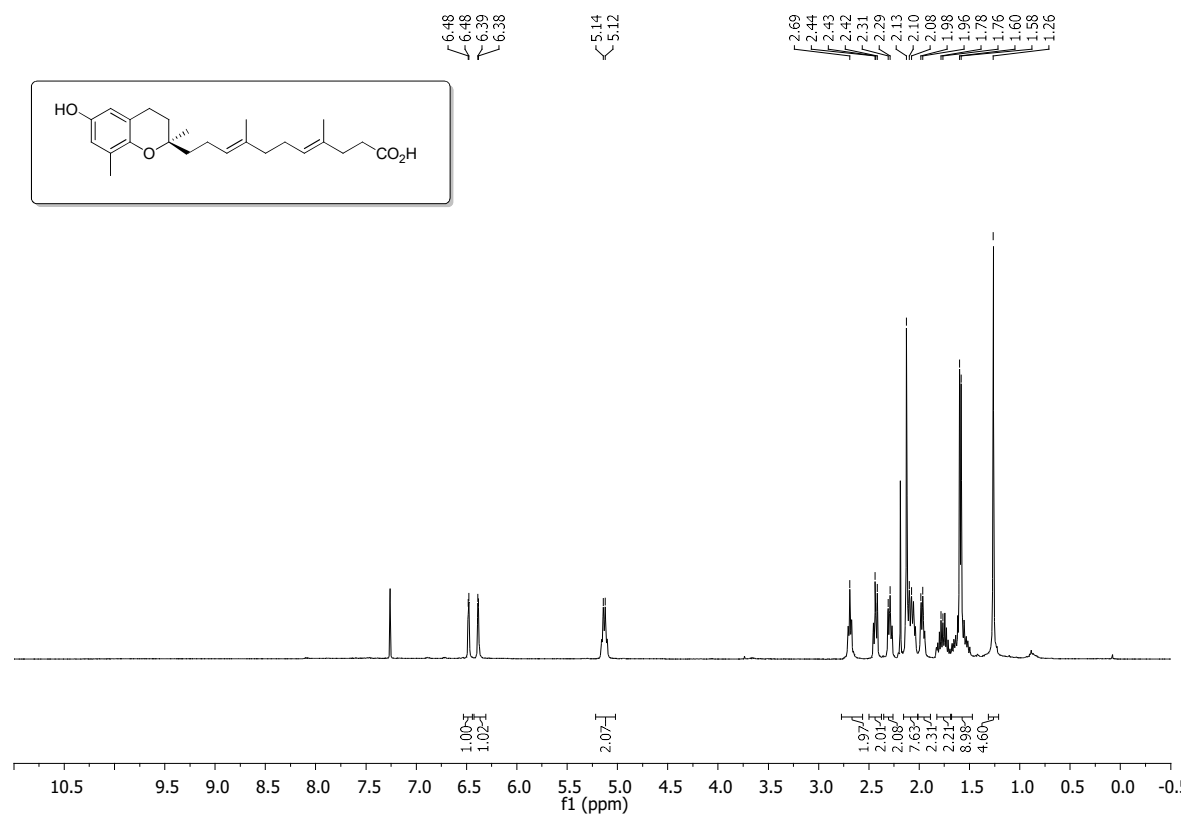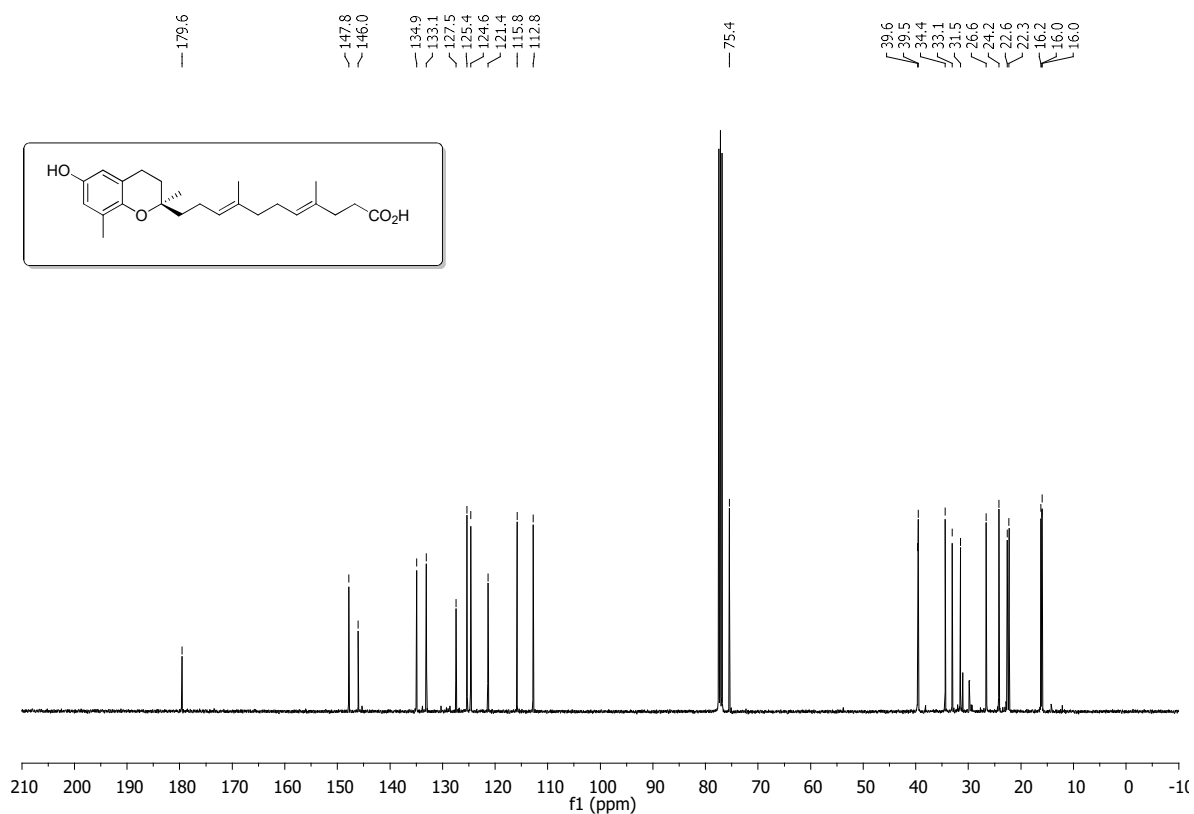

Figure S21. <sup>1</sup>H and <sup>13</sup>C NMR spectra of 15b in CDCl<sub>3</sub>

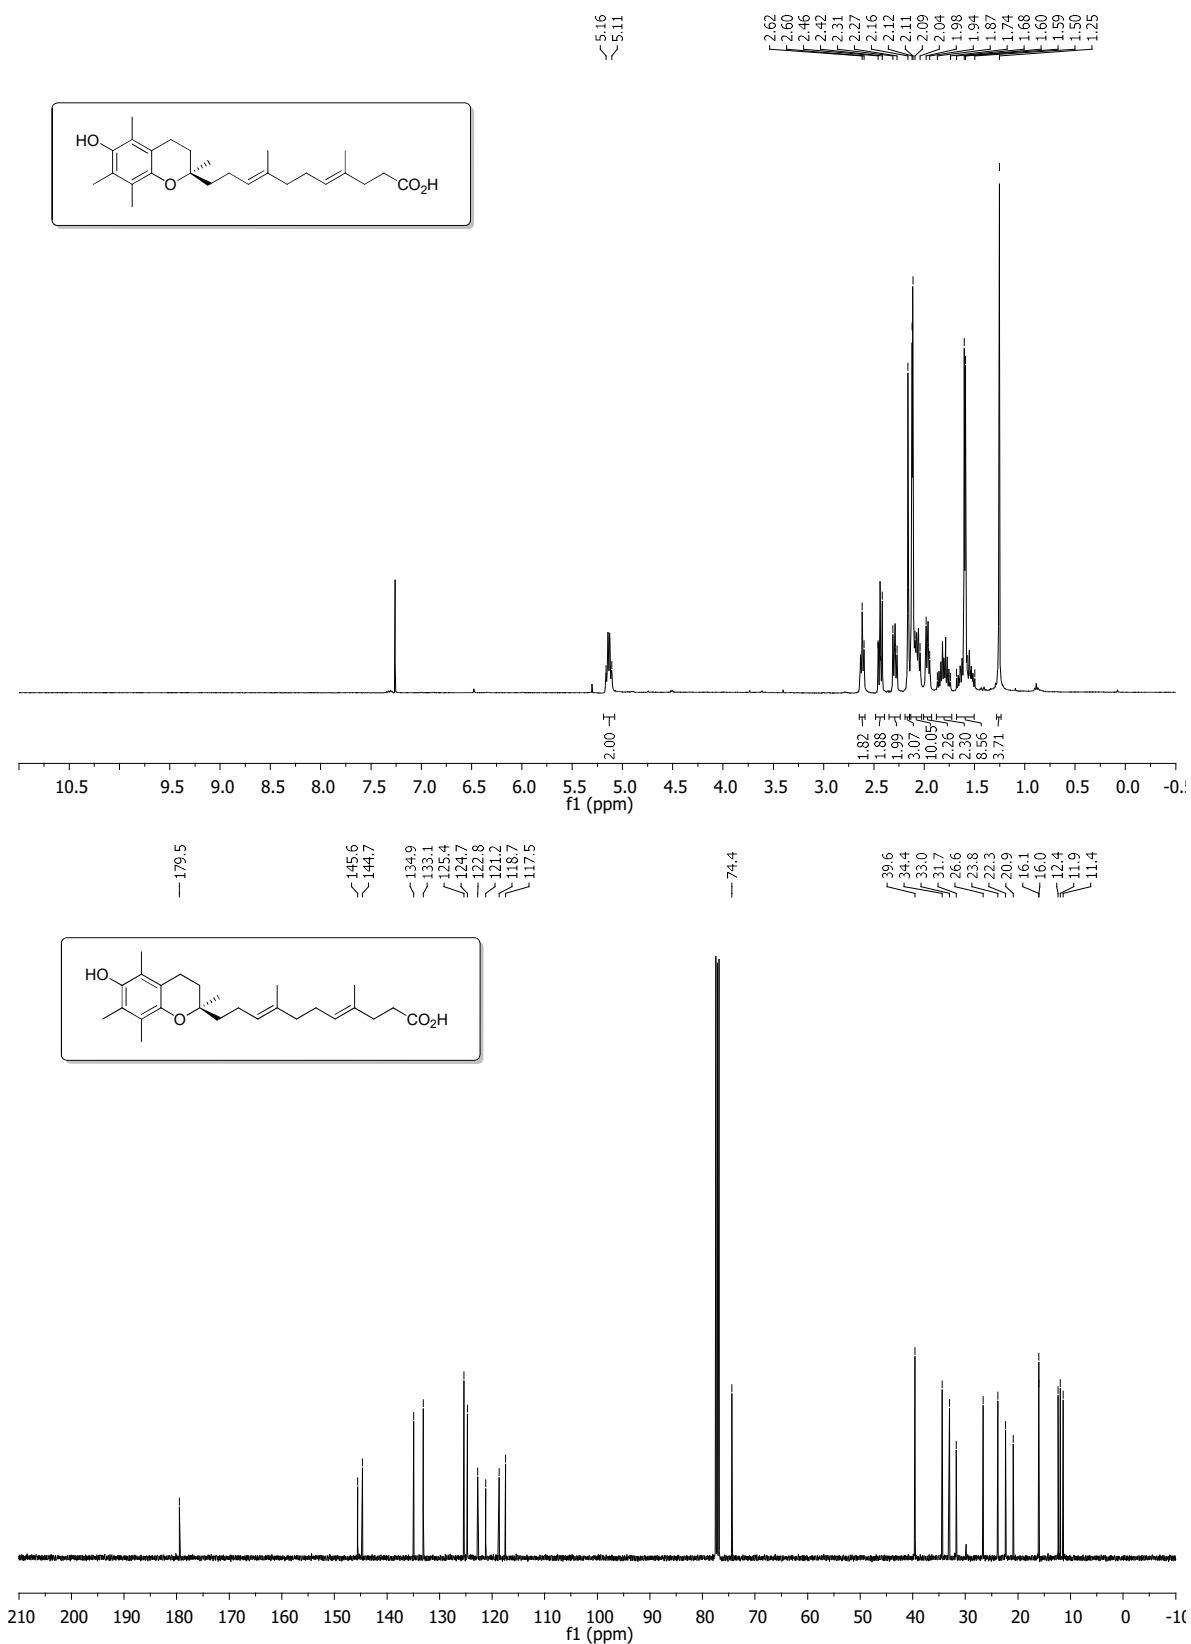

Figure S22. <sup>1</sup>H and <sup>13</sup>C NMR spectra of 15a in CDCl<sub>3</sub>

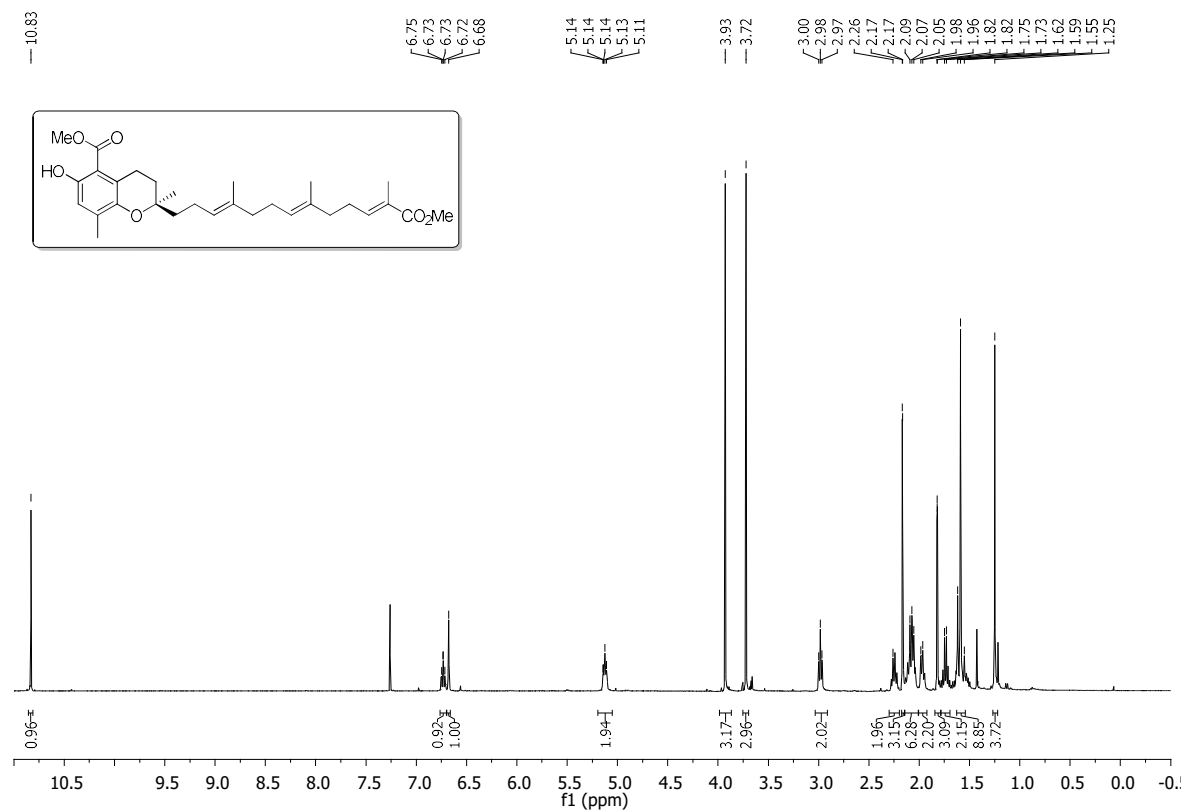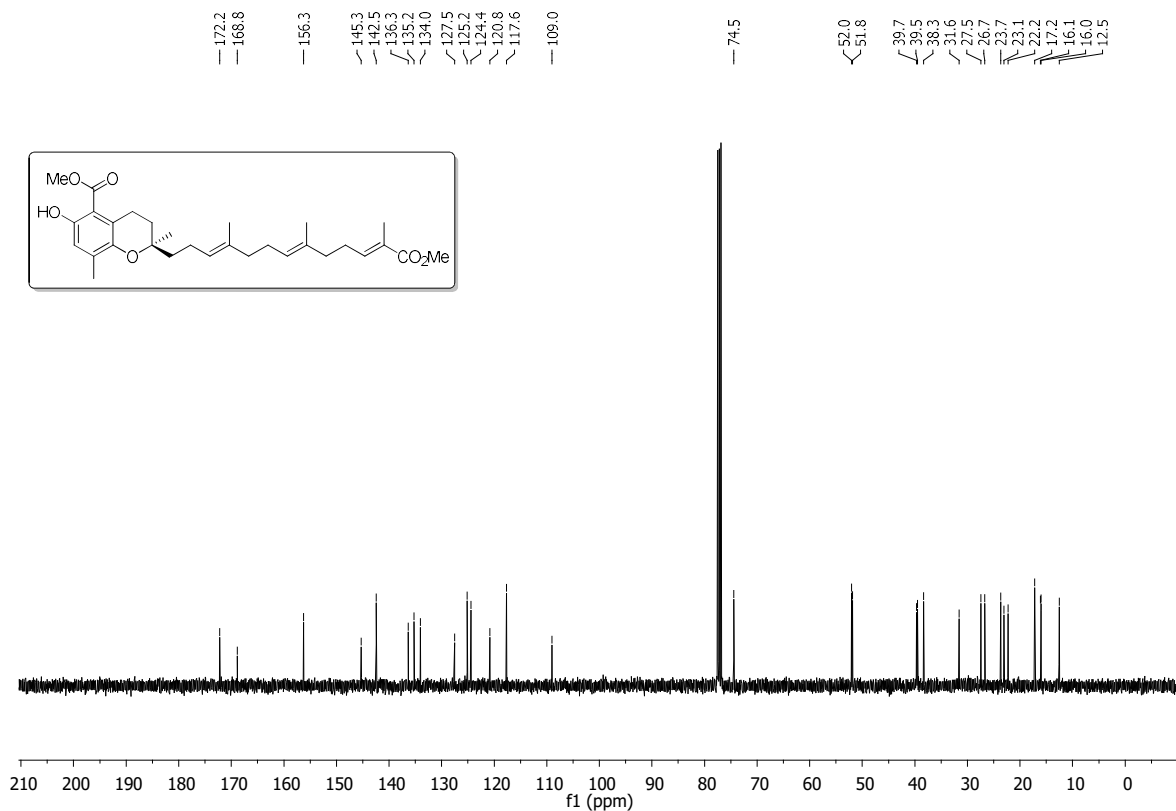

Figure S23.  $^1\text{H}$  and  $^{13}\text{C}$  NMR spectra of 25 in  $\text{CDCl}_3$

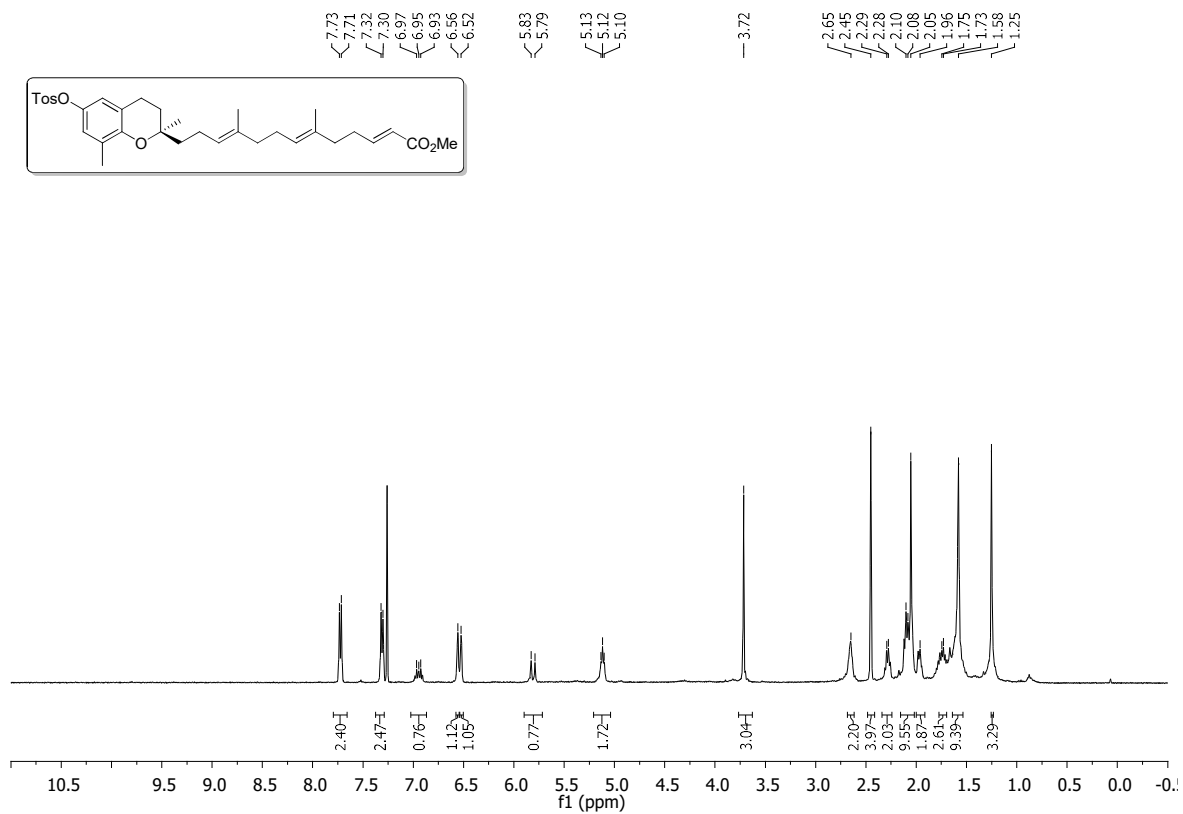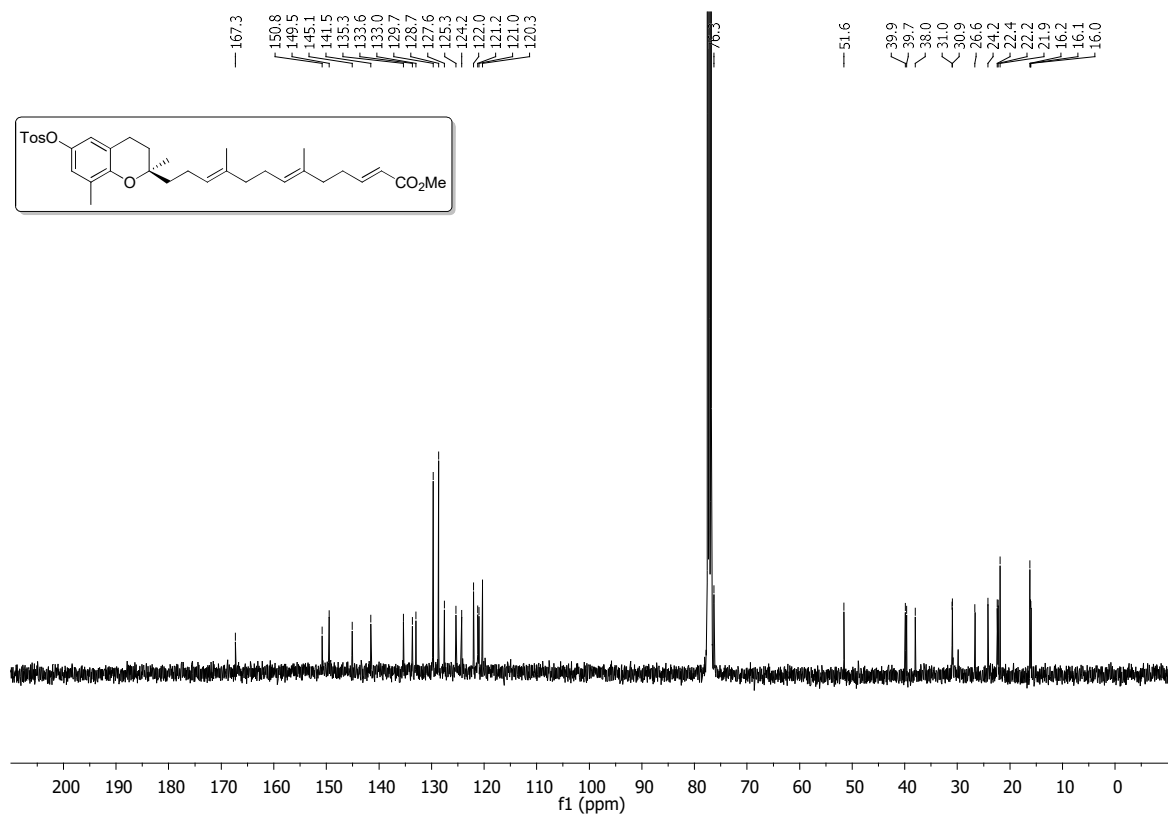

Figure S24. <sup>1</sup>H and <sup>13</sup>C NMR spectra of 58 in CDCl<sub>3</sub>

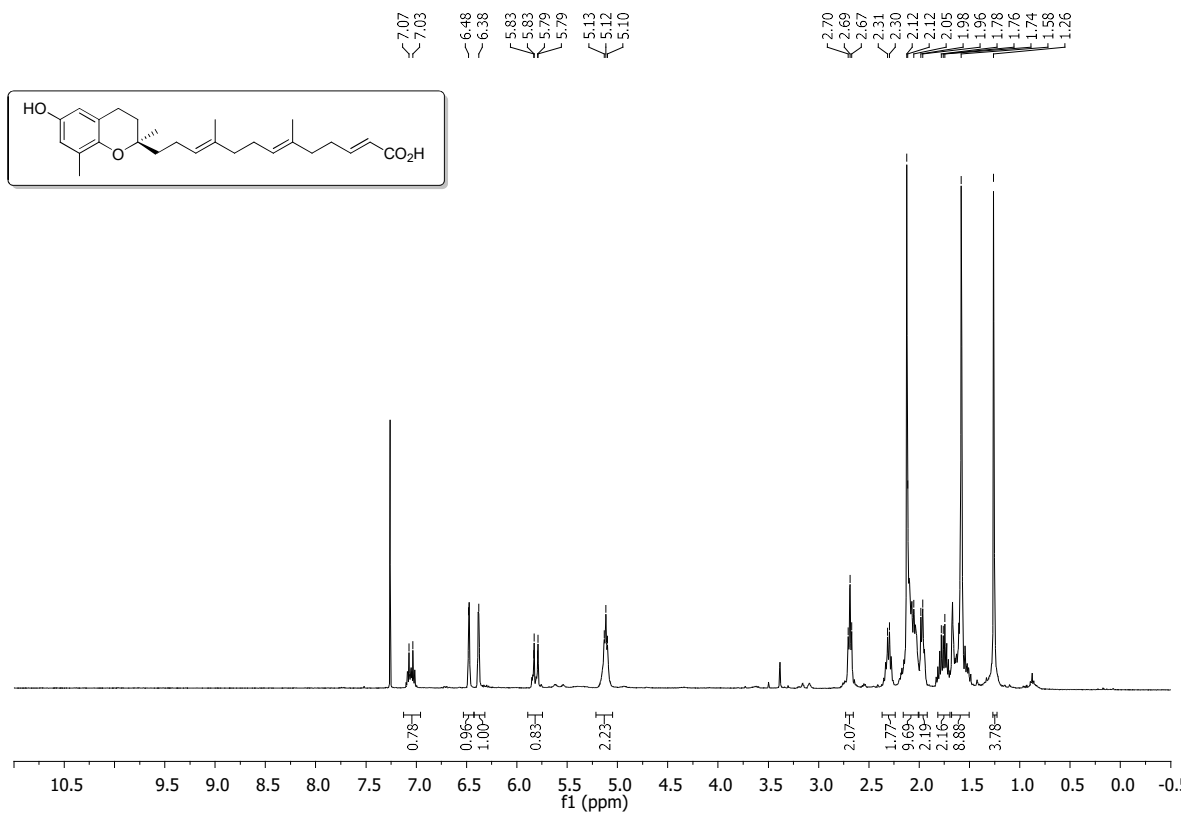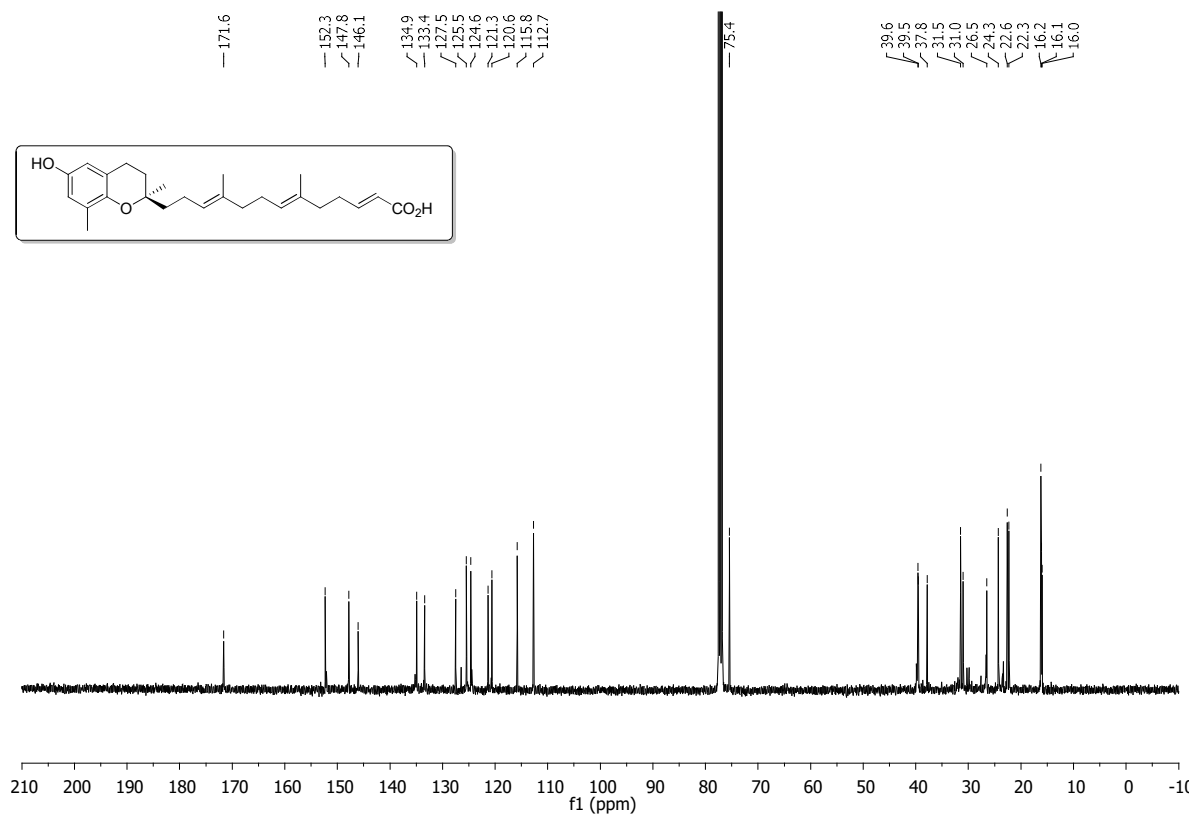

Figure S25.  $^1\text{H}$  and  $^{13}\text{C}$  NMR spectra of 14 in  $\text{CDCl}_3$

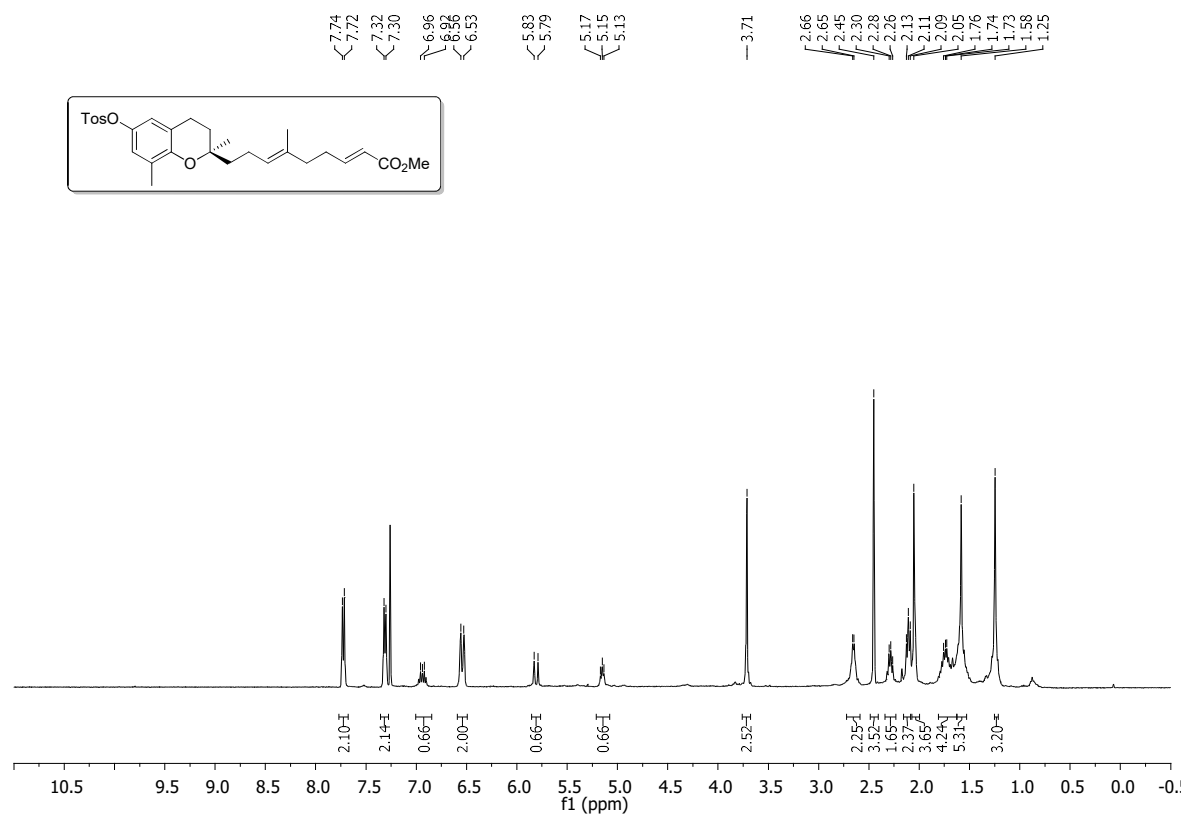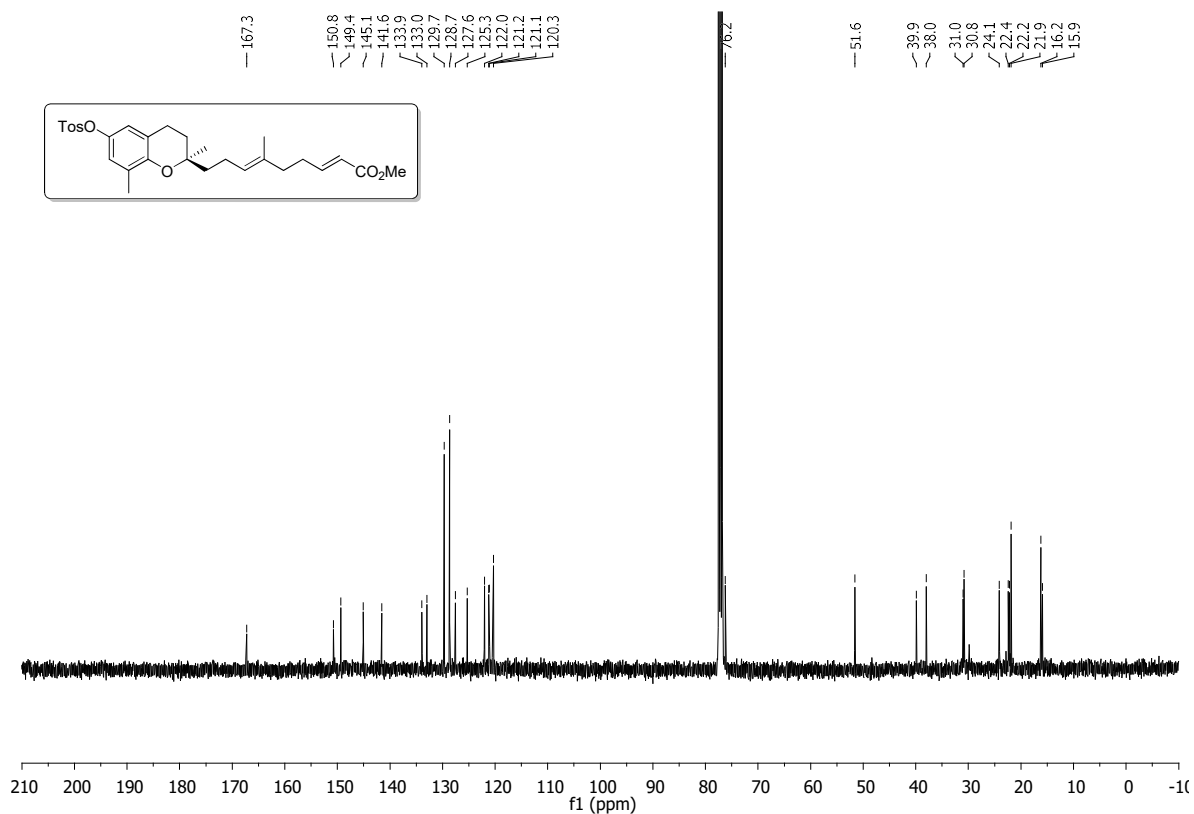

Figure S26. <sup>1</sup>H and <sup>13</sup>C NMR spectra of 59 in CDCl<sub>3</sub>.

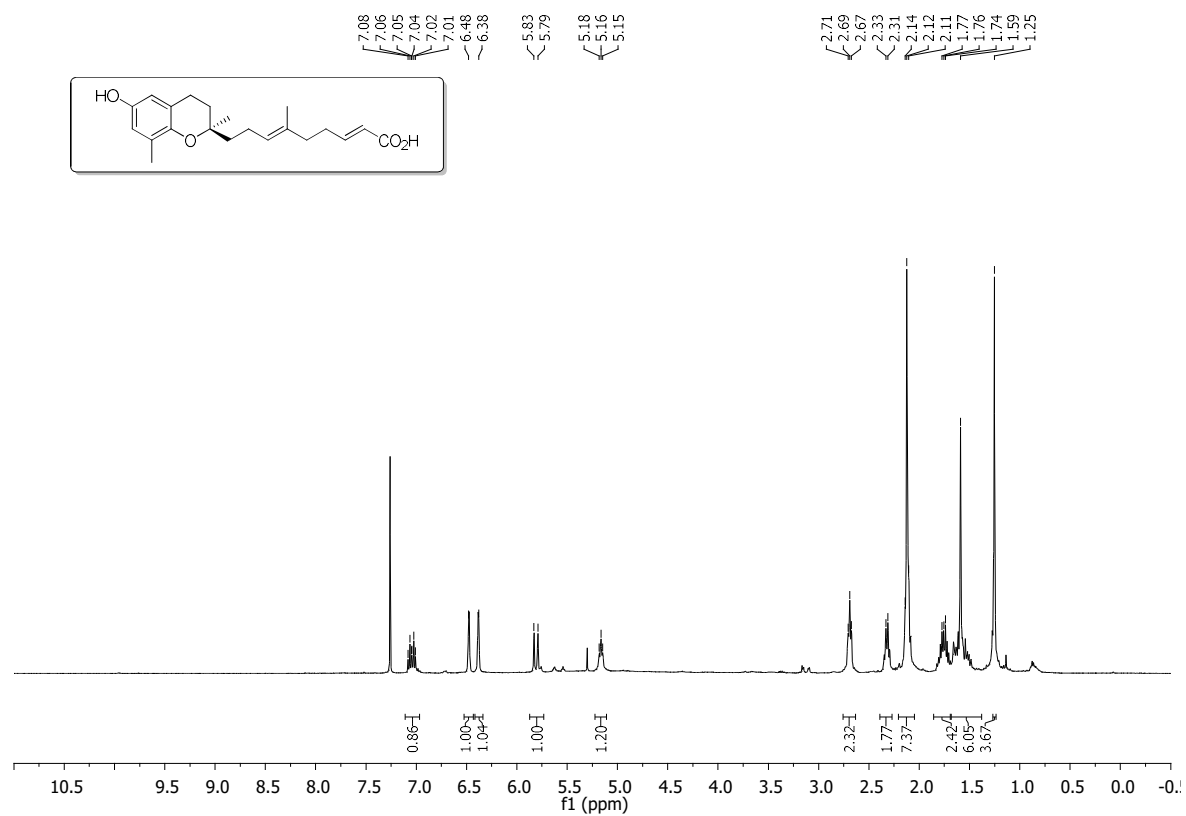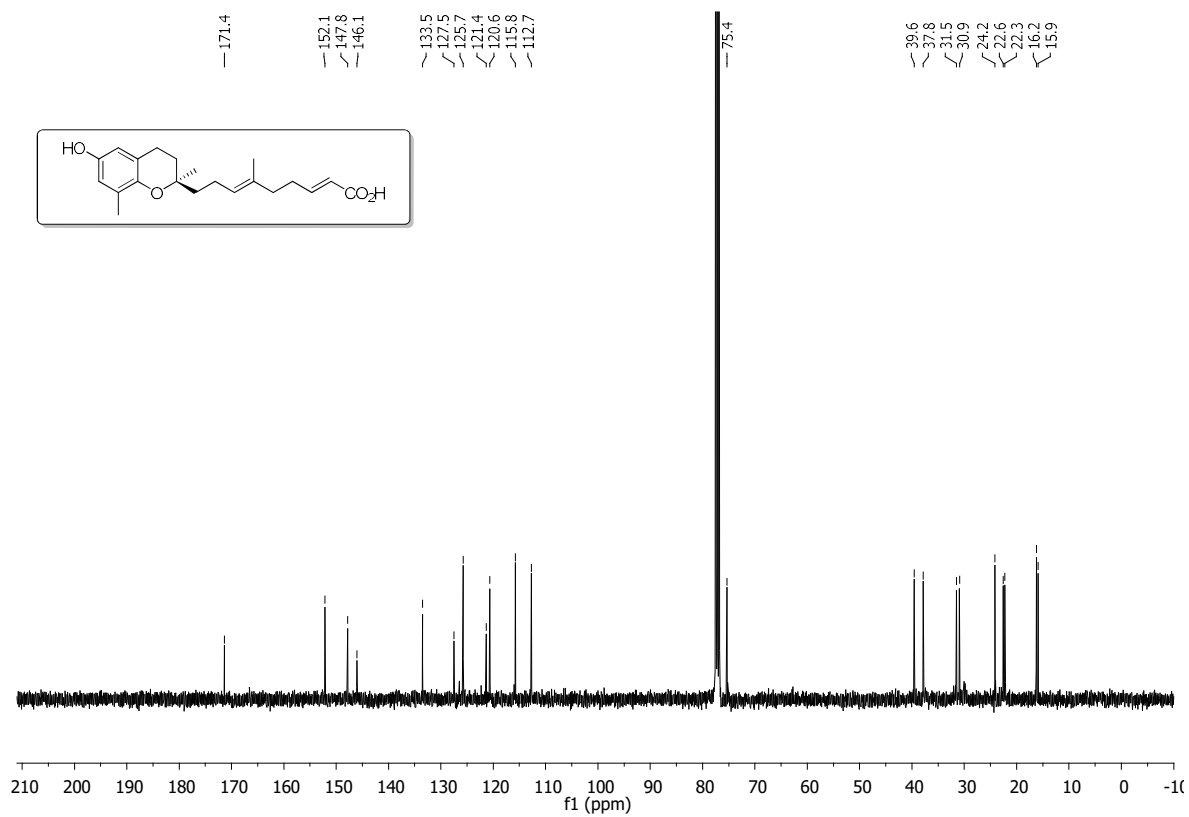

Figure S27.  $^1\text{H}$  and  $^{13}\text{C}$  NMR spectra of 16 in  $\text{CDCl}_3$ .



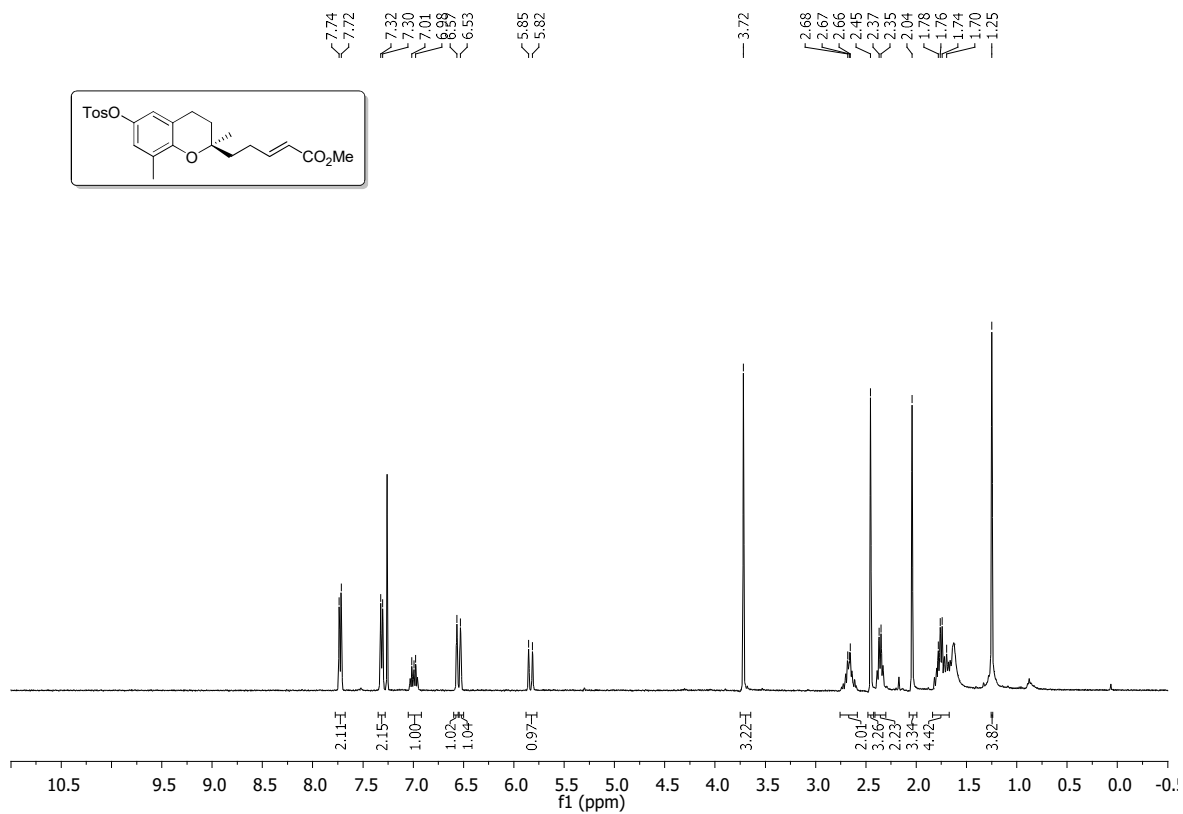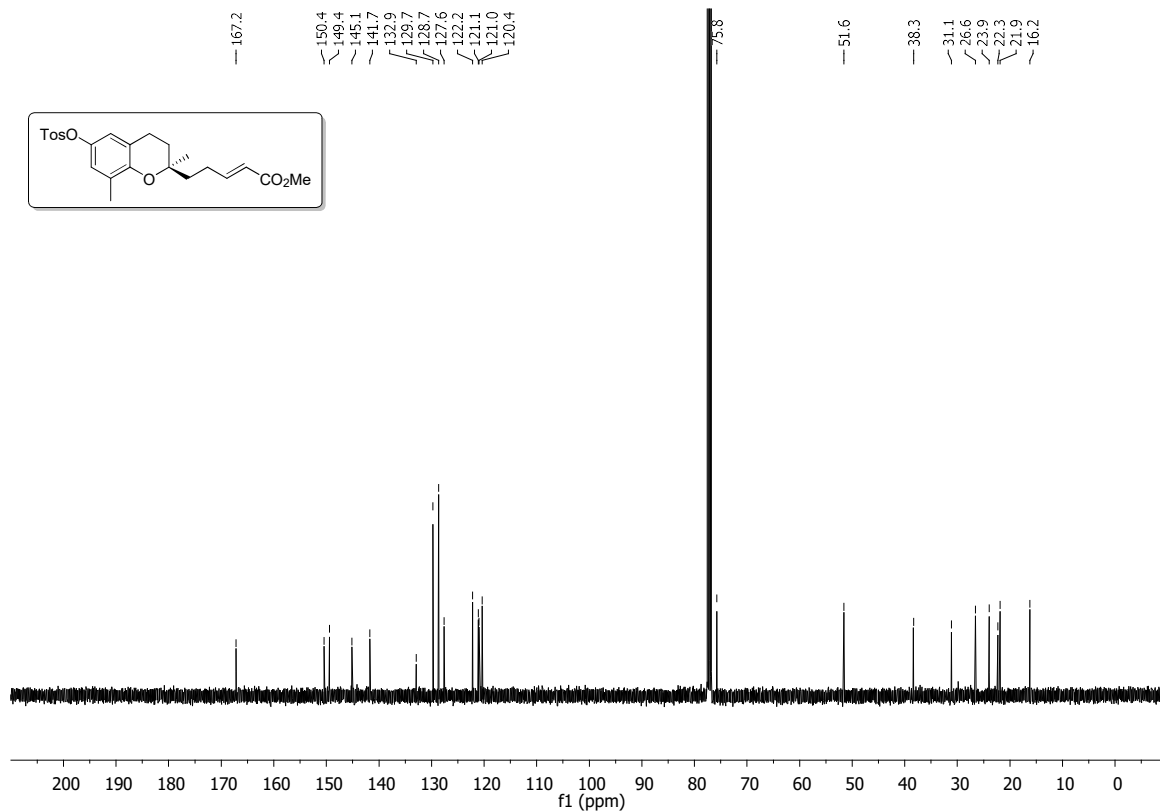

Figure S28. <sup>1</sup>H and <sup>13</sup>C NMR spectra of 60 in CDCl<sub>3</sub>

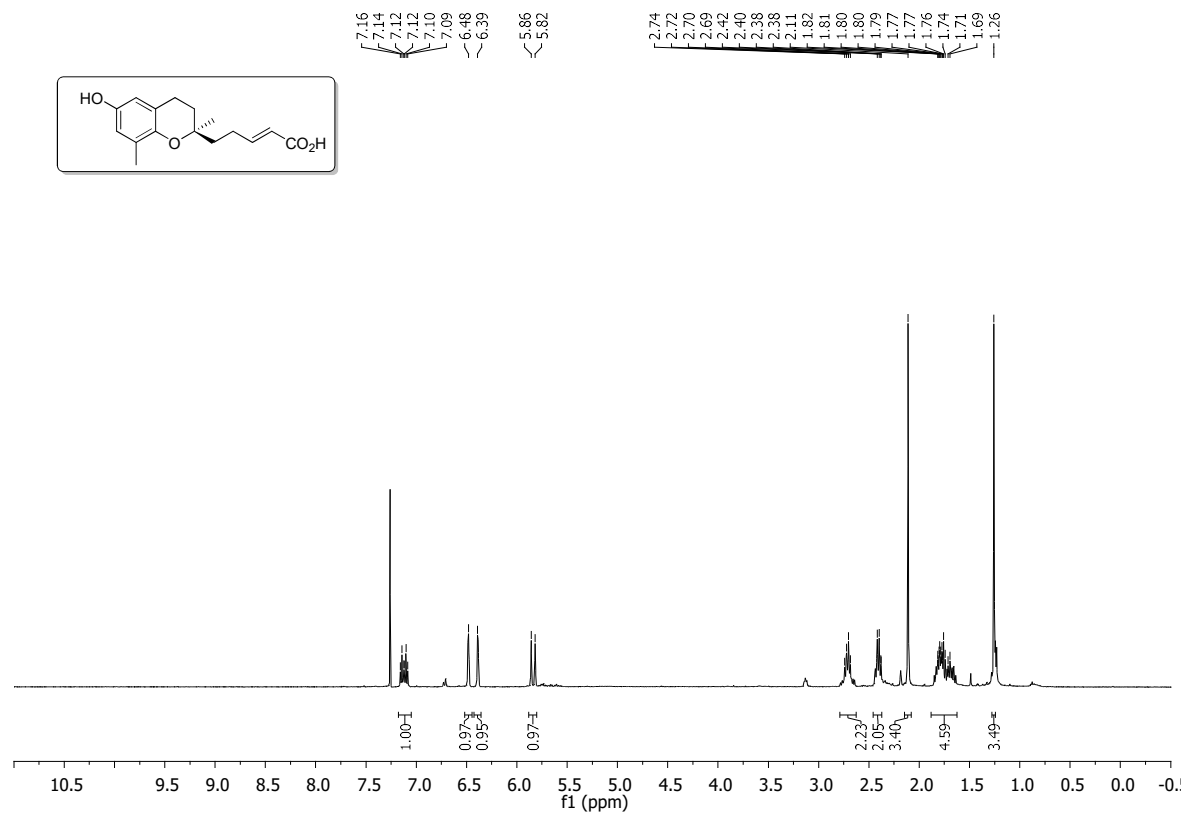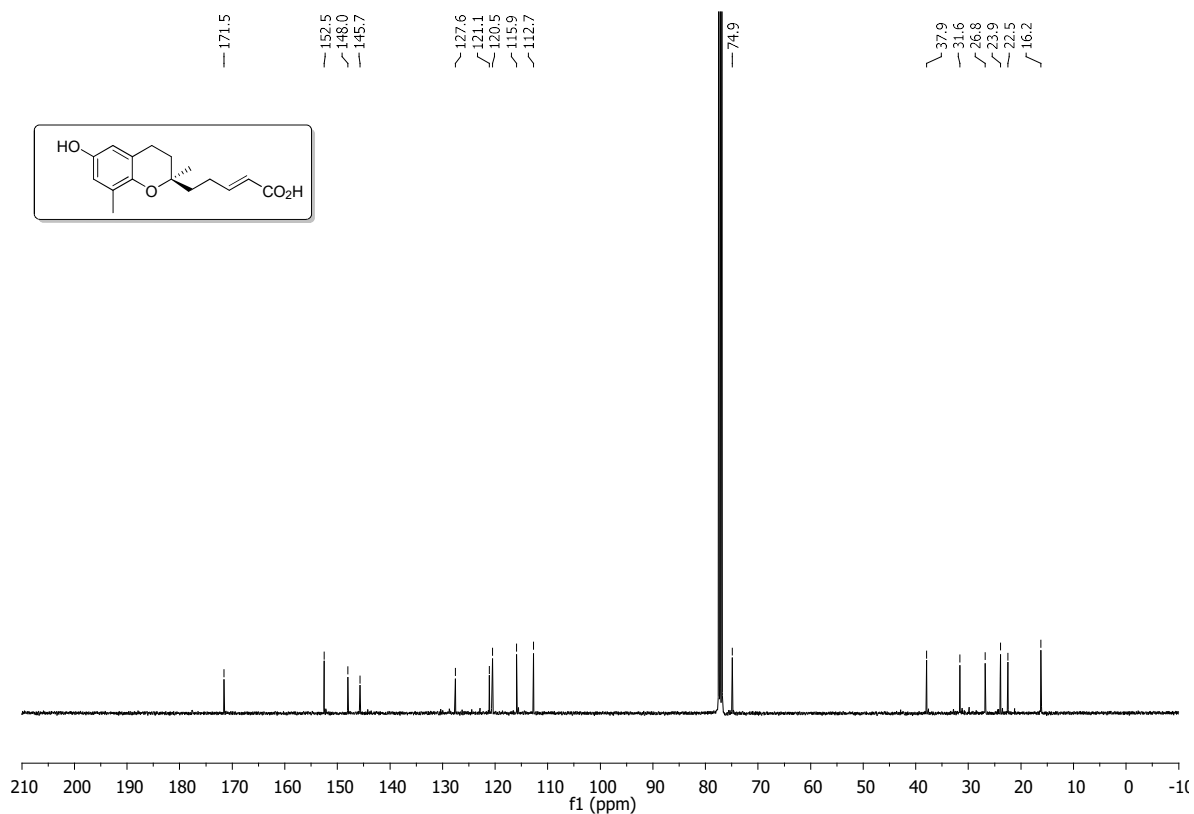

Figure S29. <sup>1</sup>H and <sup>13</sup>C NMR spectra of 17 in CDCl<sub>3</sub>

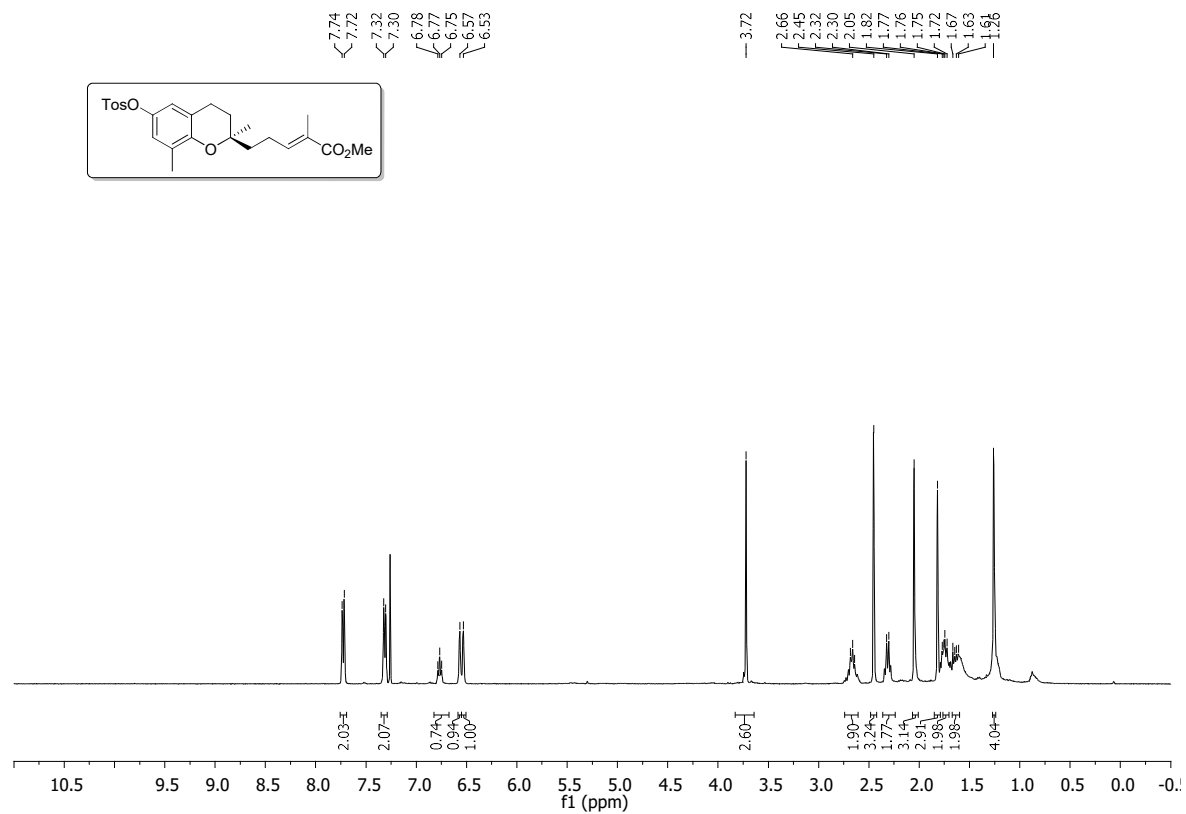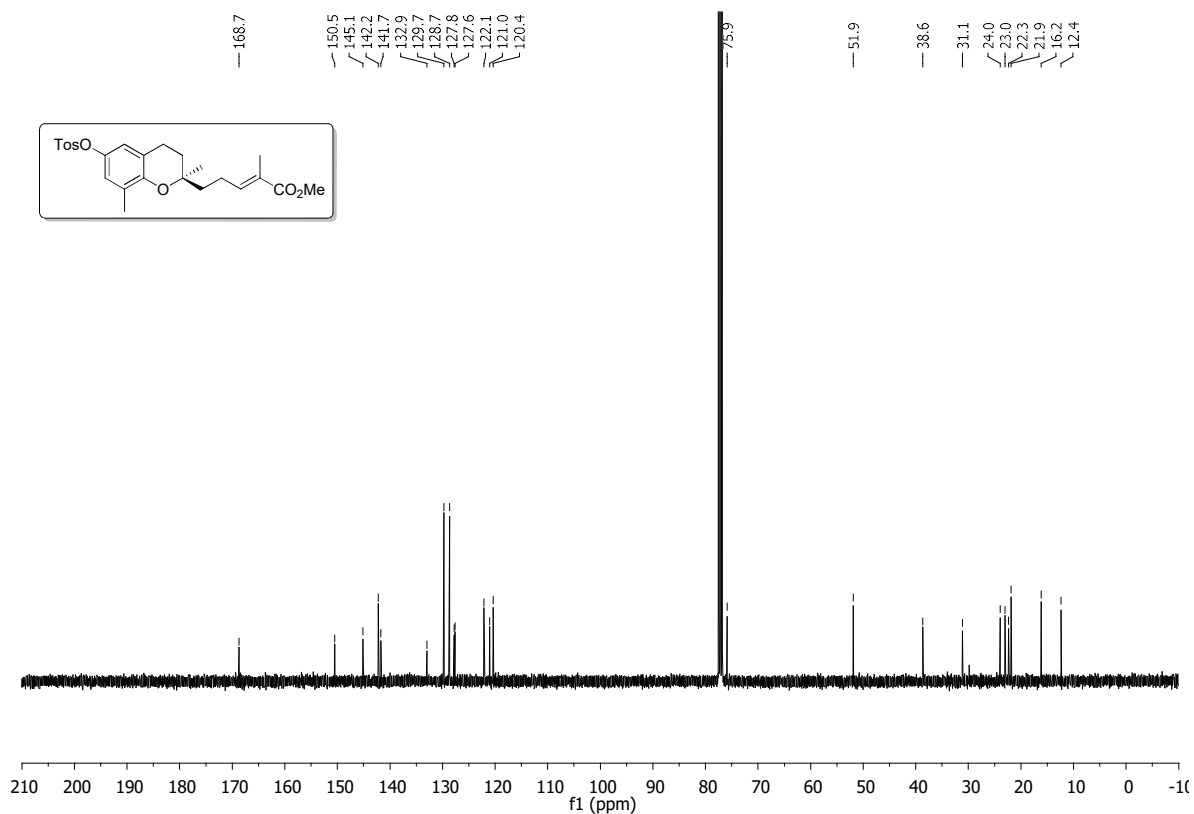

Figure S30. <sup>1</sup>H and <sup>13</sup>C NMR spectra of 61 in CDCl<sub>3</sub>

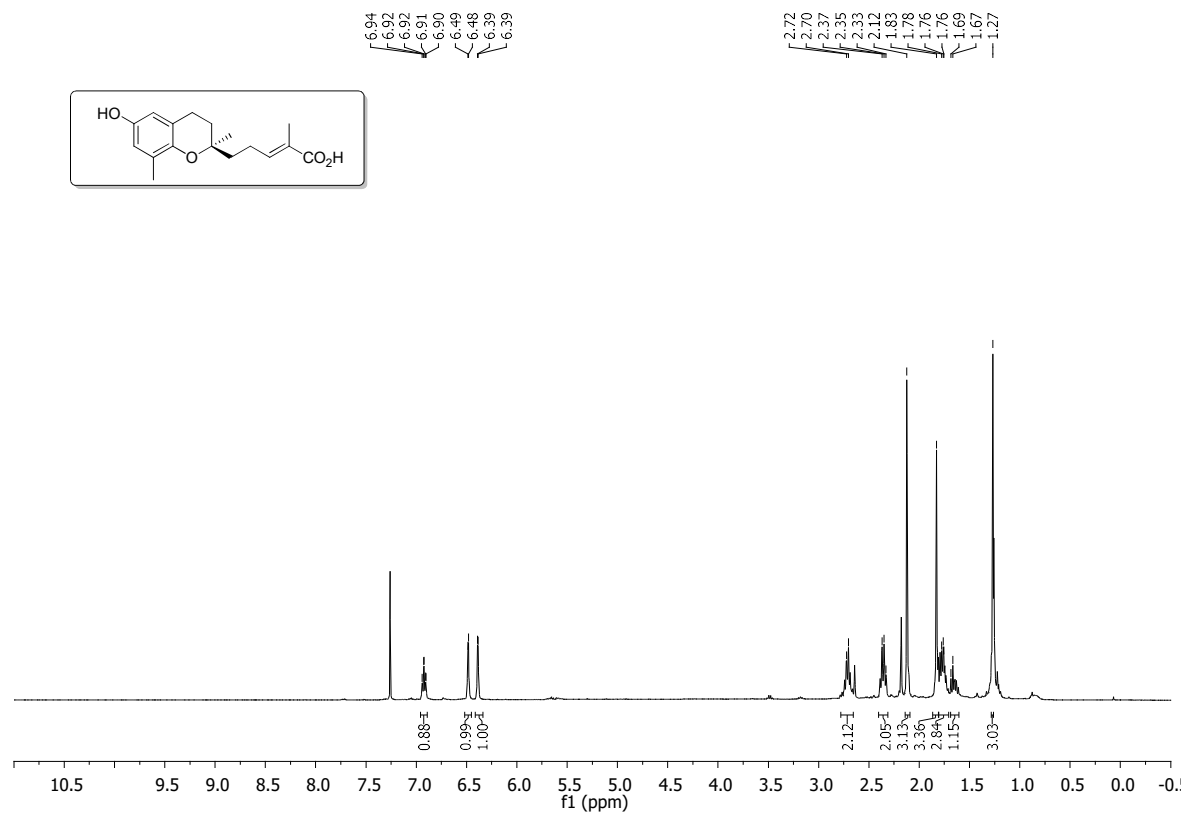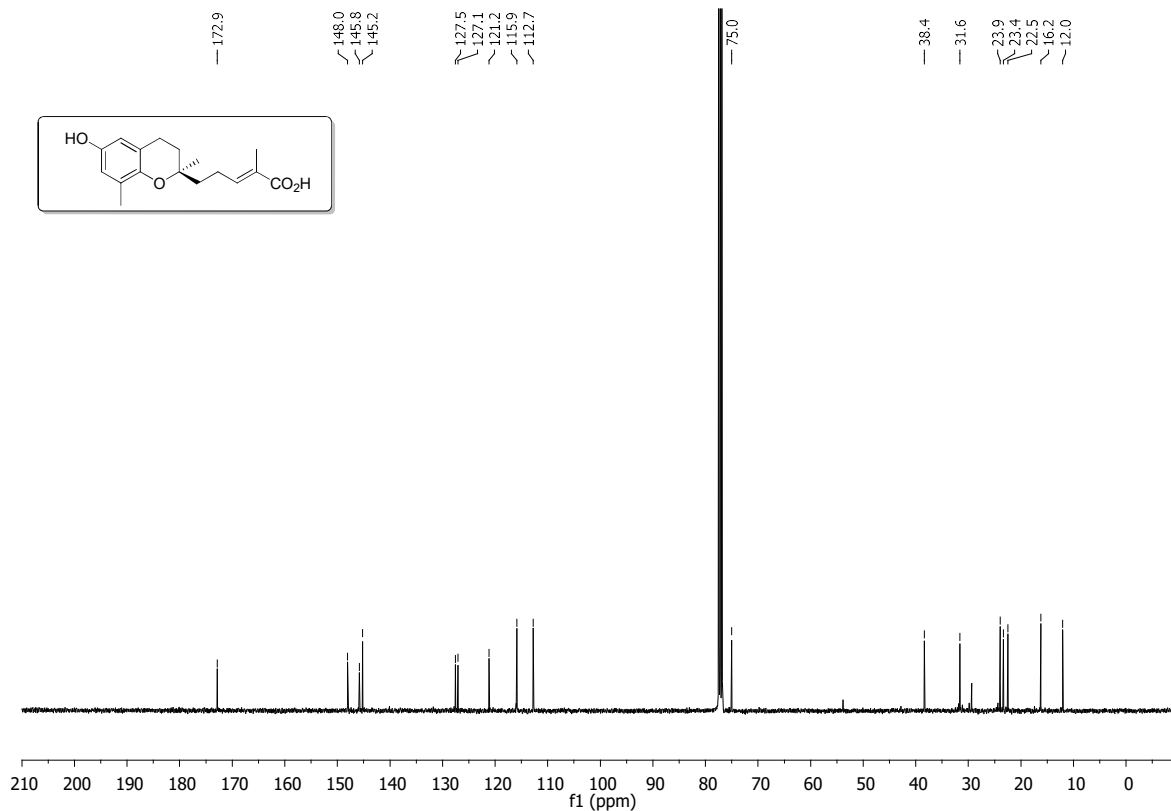

Figure S31.  $^1\text{H}$  and  $^{13}\text{C}$  NMR spectra of 18 in  $\text{CDCl}_3$

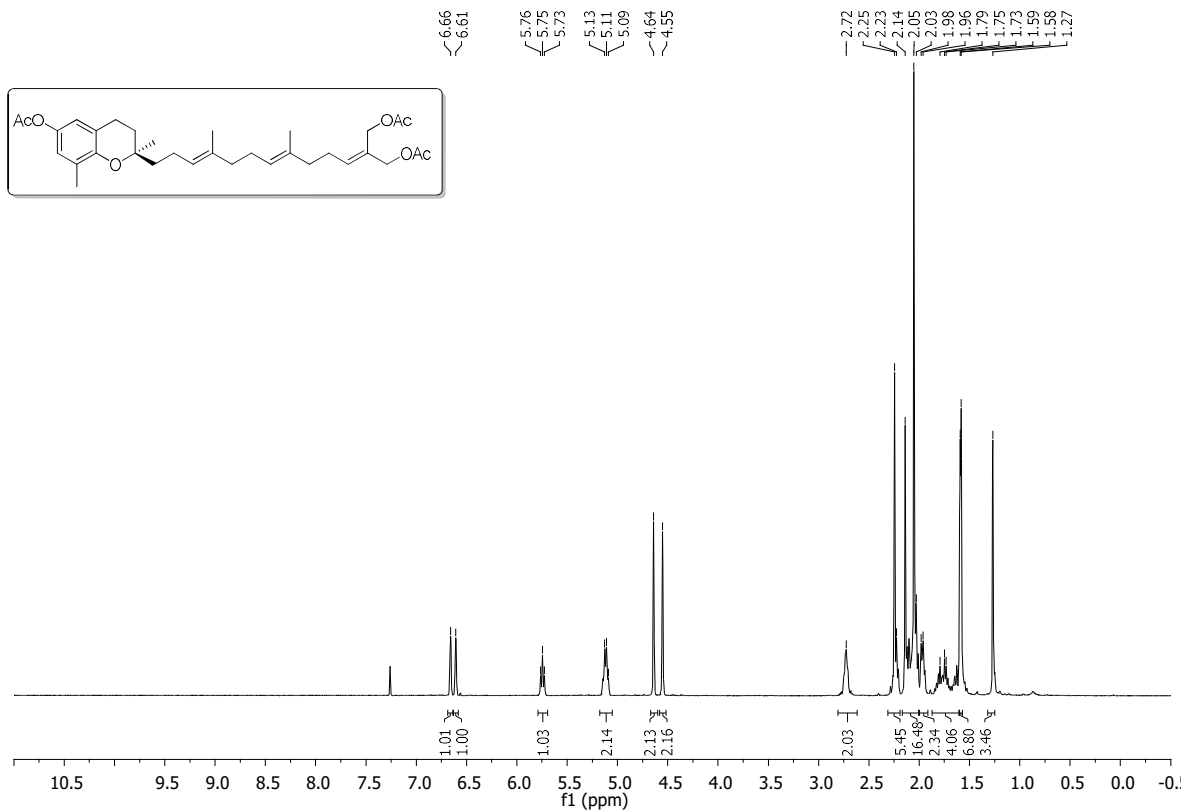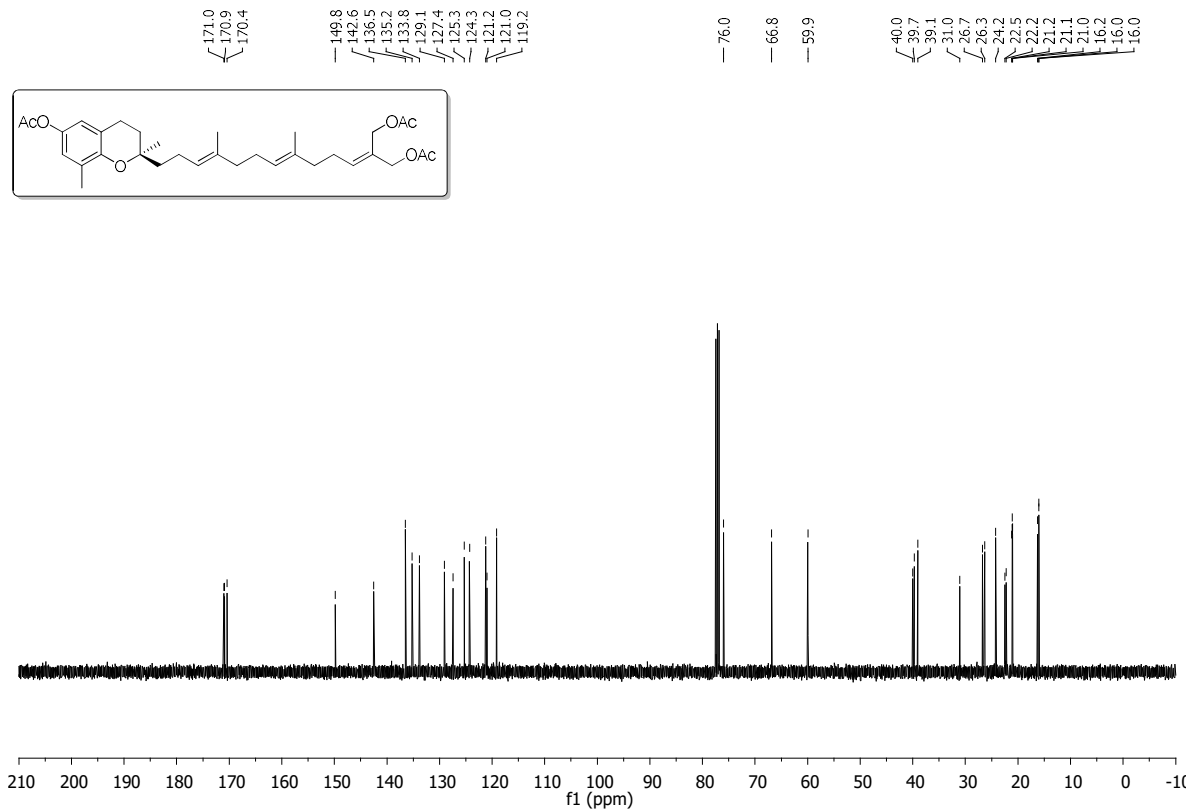

Figure S32. <sup>1</sup>H and <sup>13</sup>C NMR spectra of 65 in CDCl<sub>3</sub>

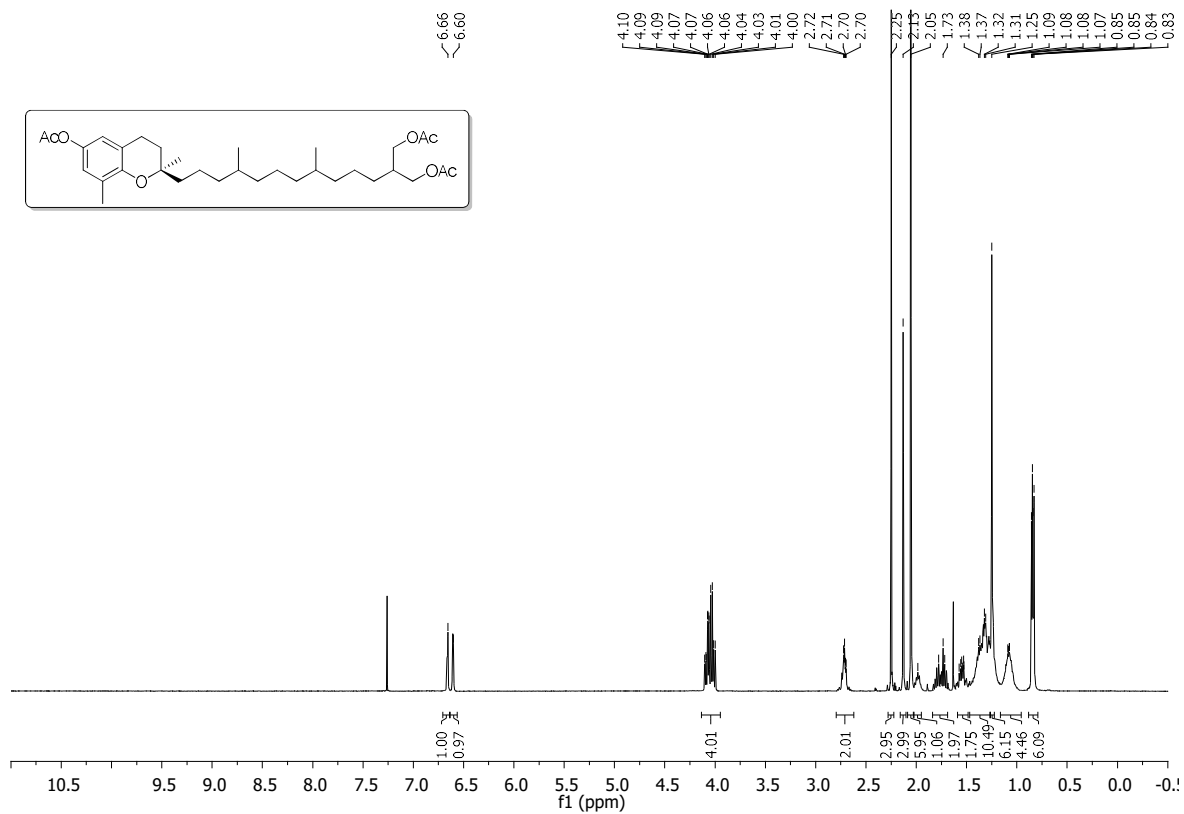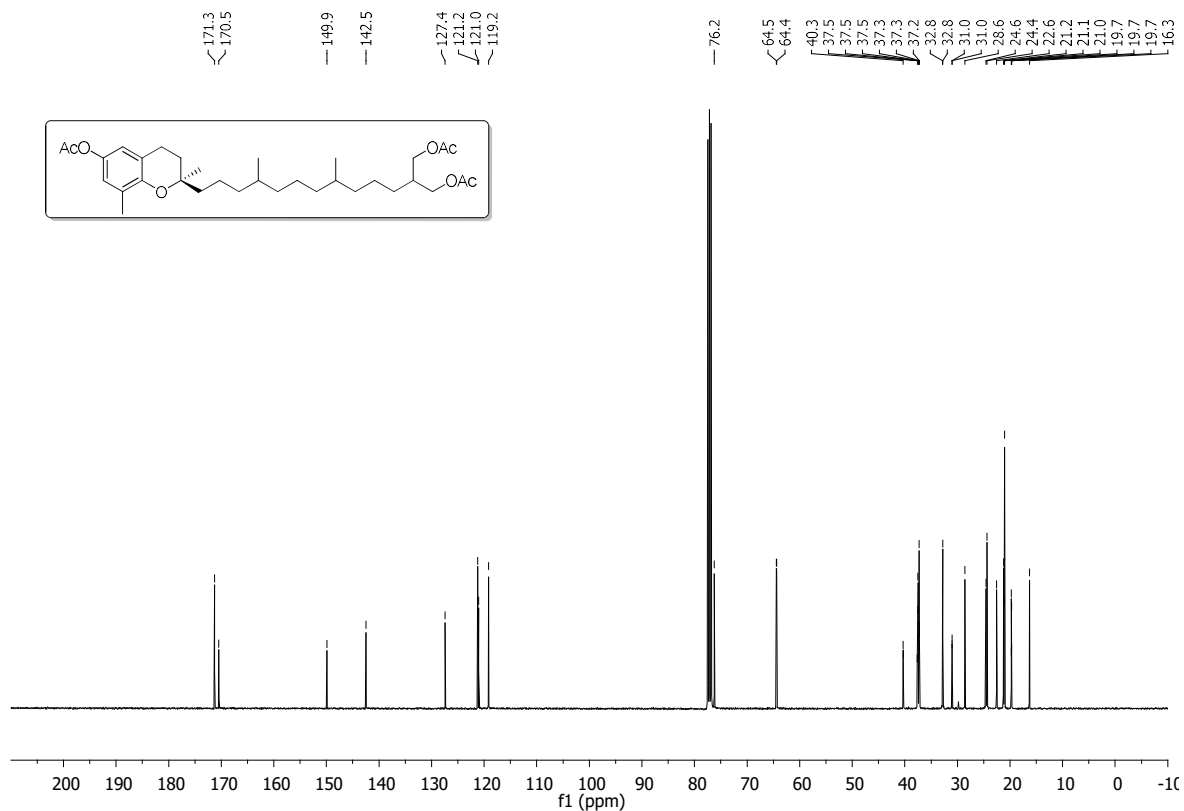

Figure S33. <sup>1</sup>H and <sup>13</sup>C NMR spectra of 66 in CDCl<sub>3</sub>

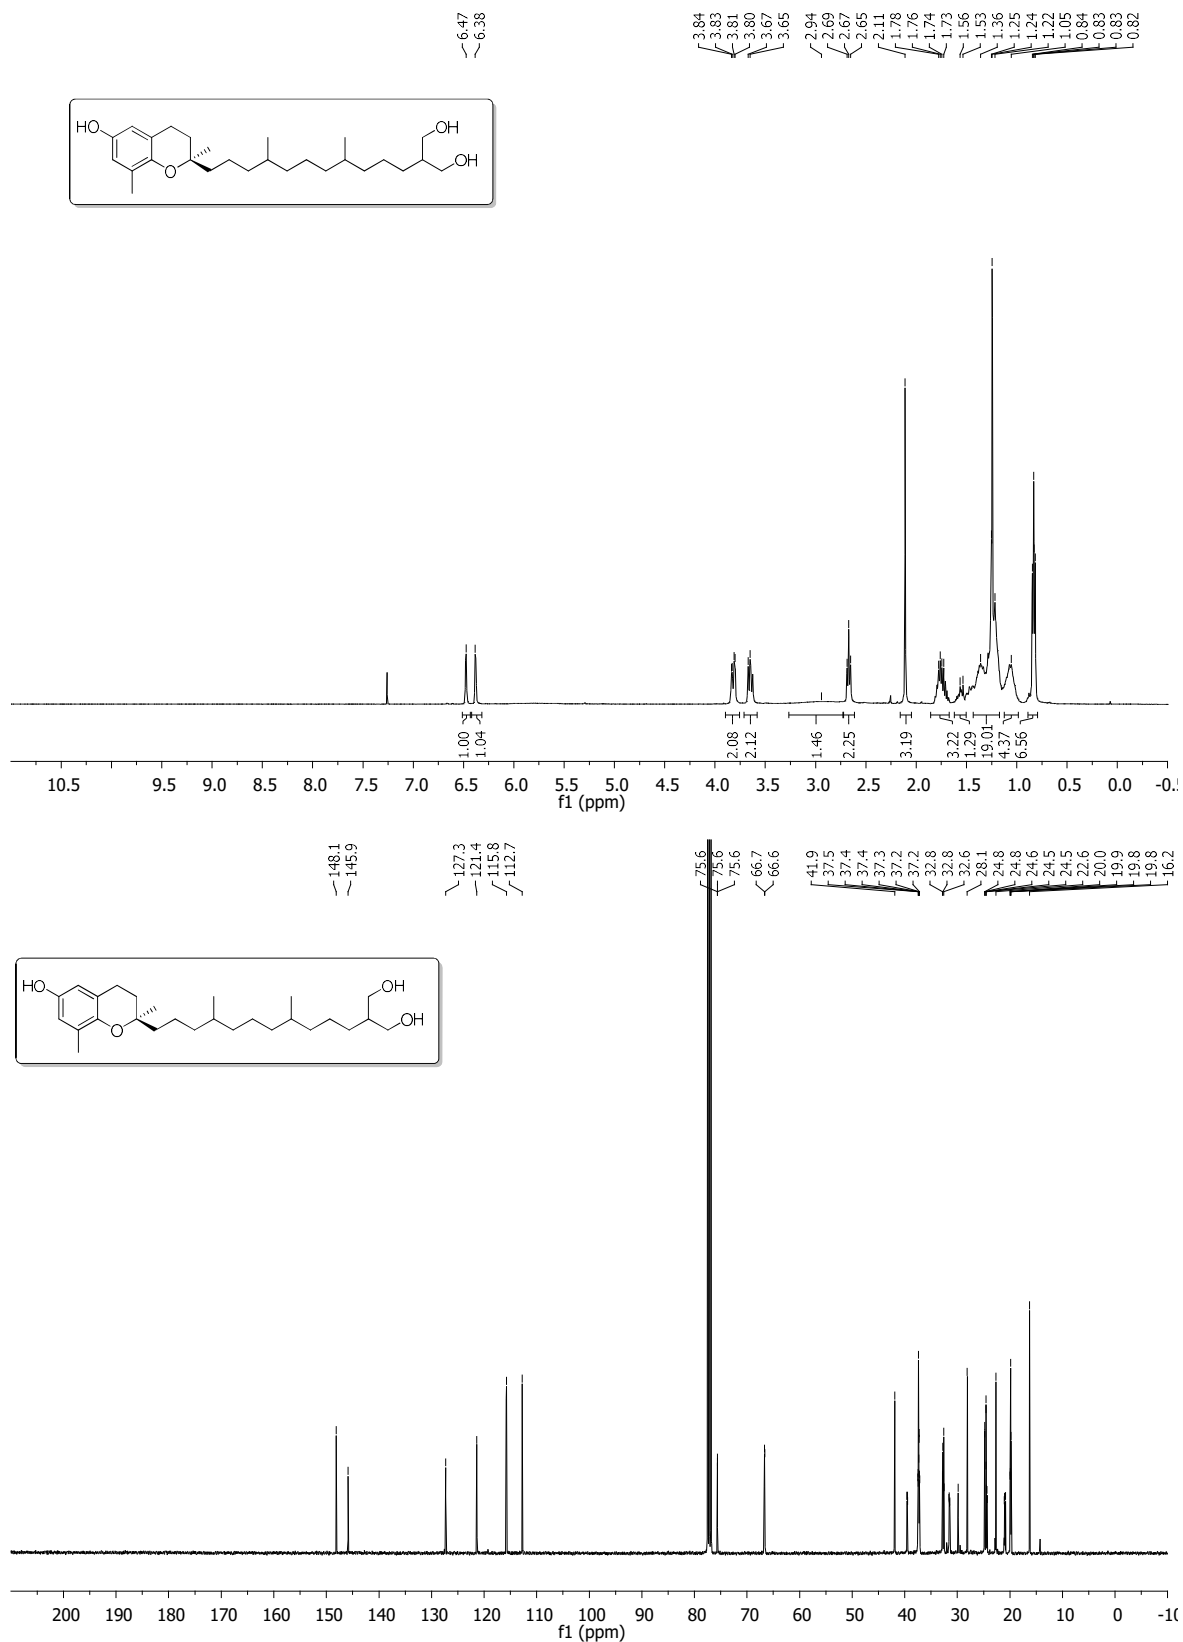

Figure S34. <sup>1</sup>H and <sup>13</sup>C NMR spectra of 26 in CDCl<sub>3</sub>

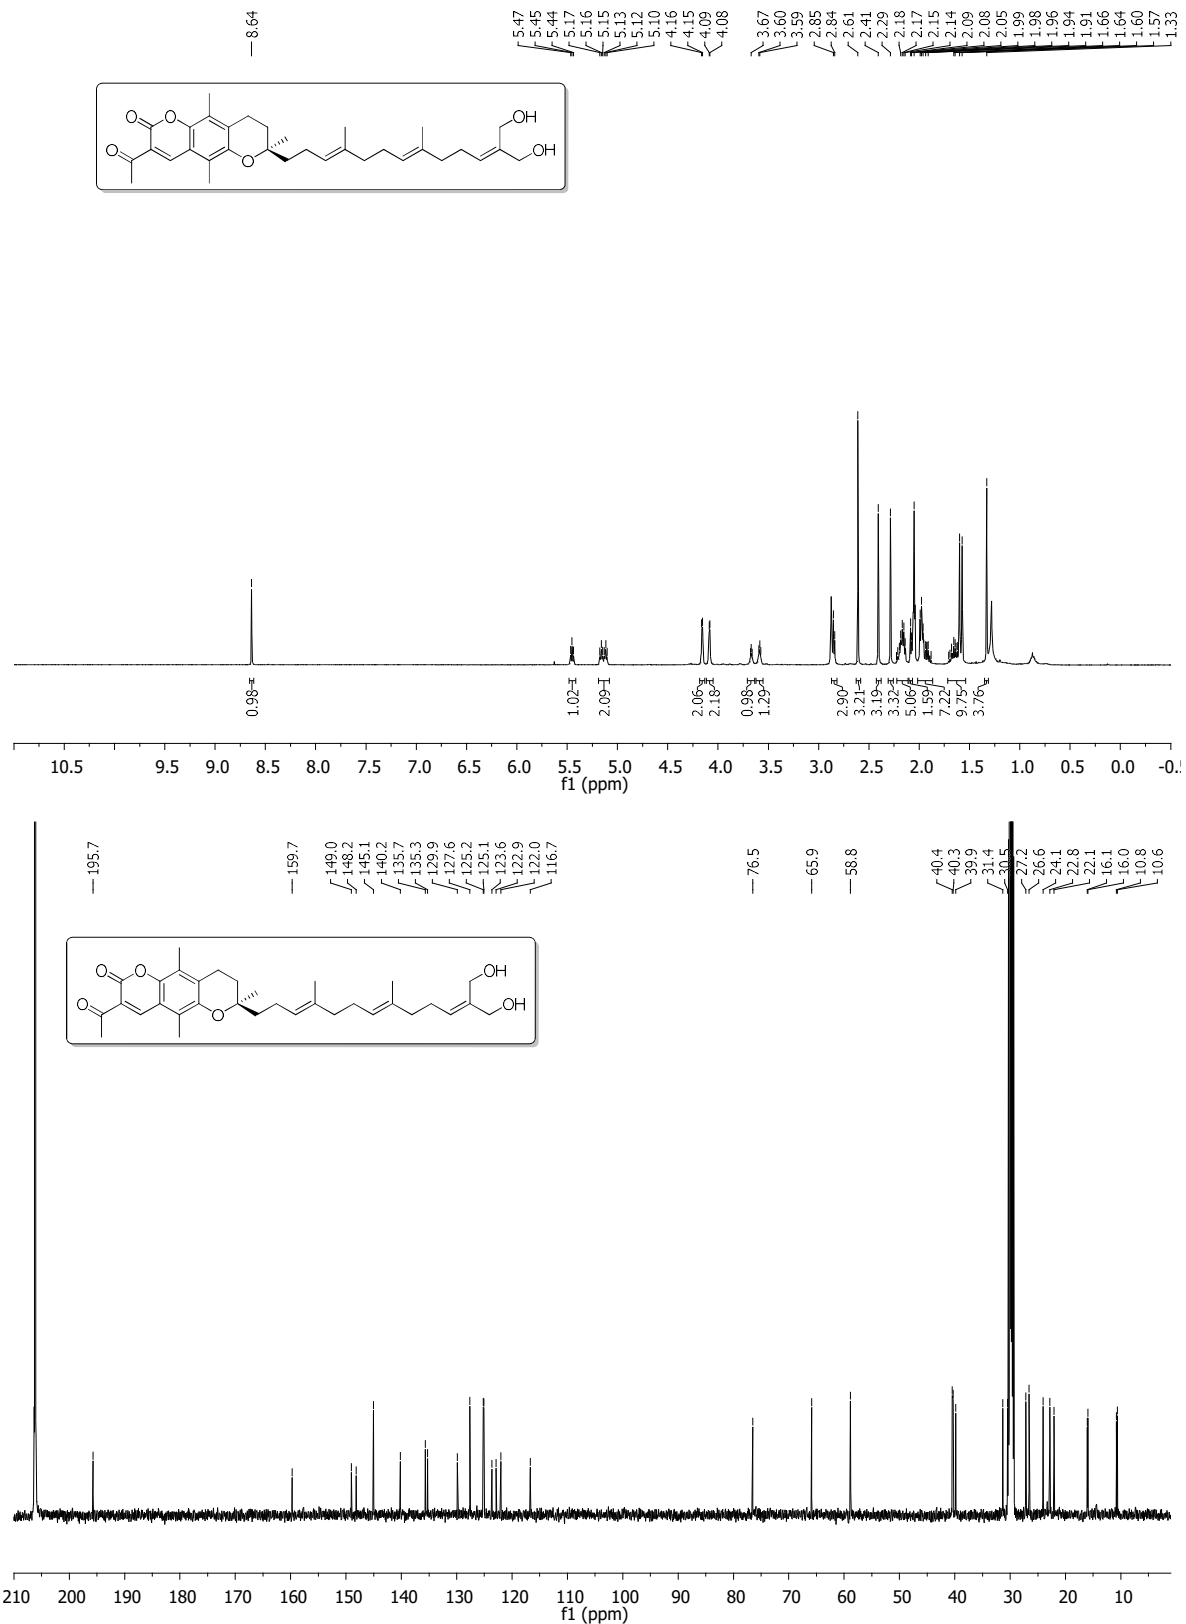

Figure S35. <sup>1</sup>H and <sup>13</sup>C NMR spectra of 41 in acetone-d<sub>6</sub>



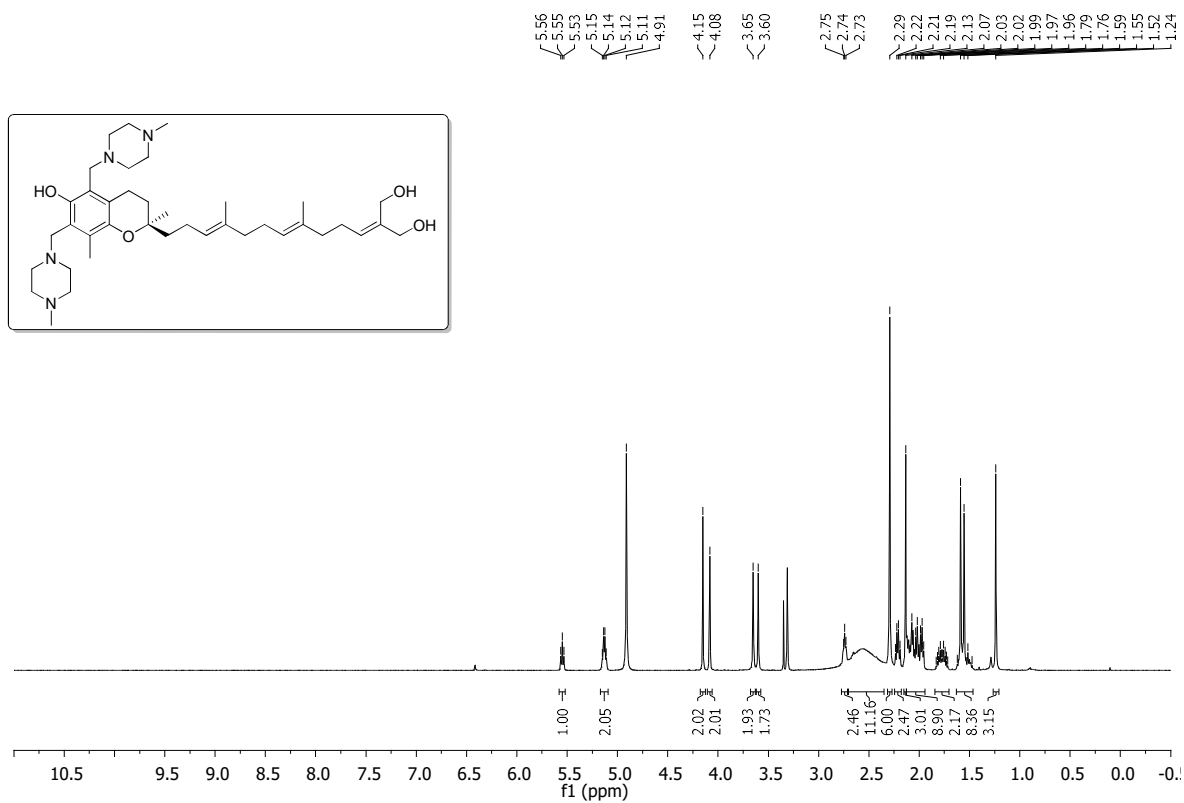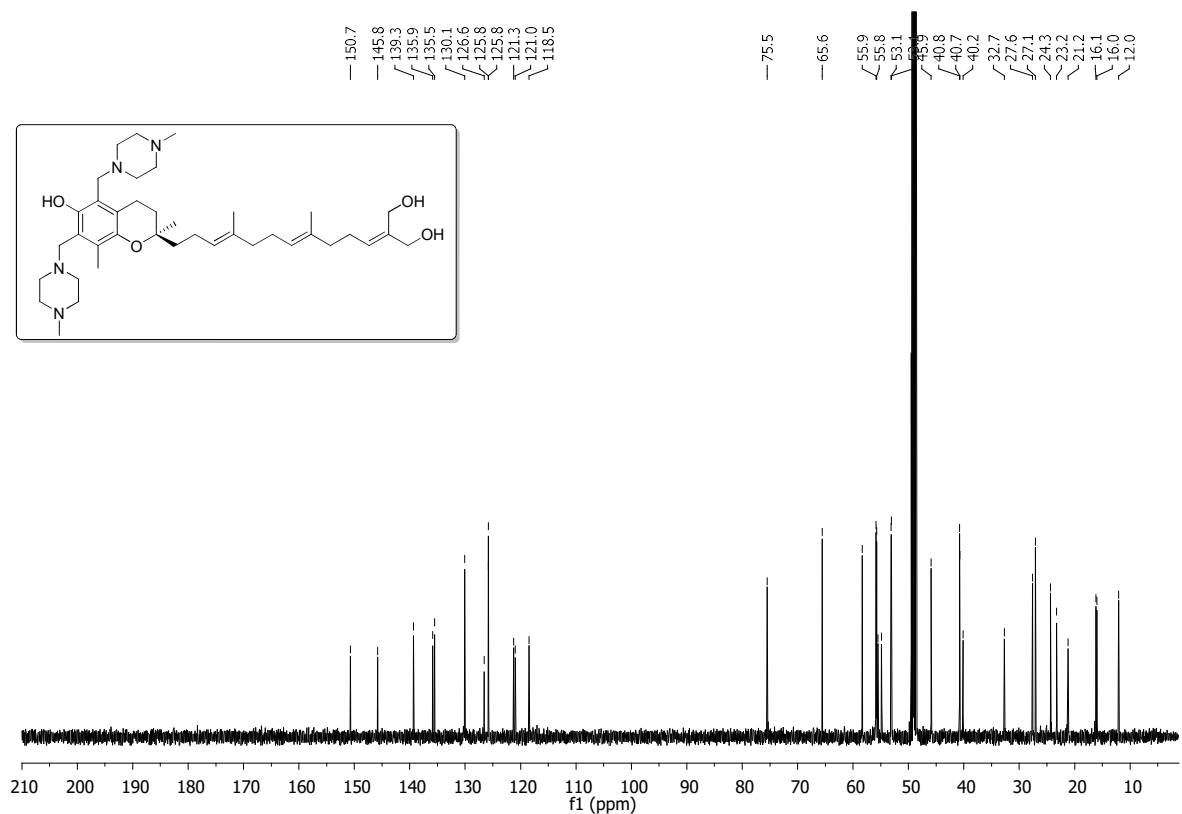

Figure S36. <sup>1</sup>H and <sup>13</sup>C NMR spectra of 40 in methanol-*d*<sub>4</sub>

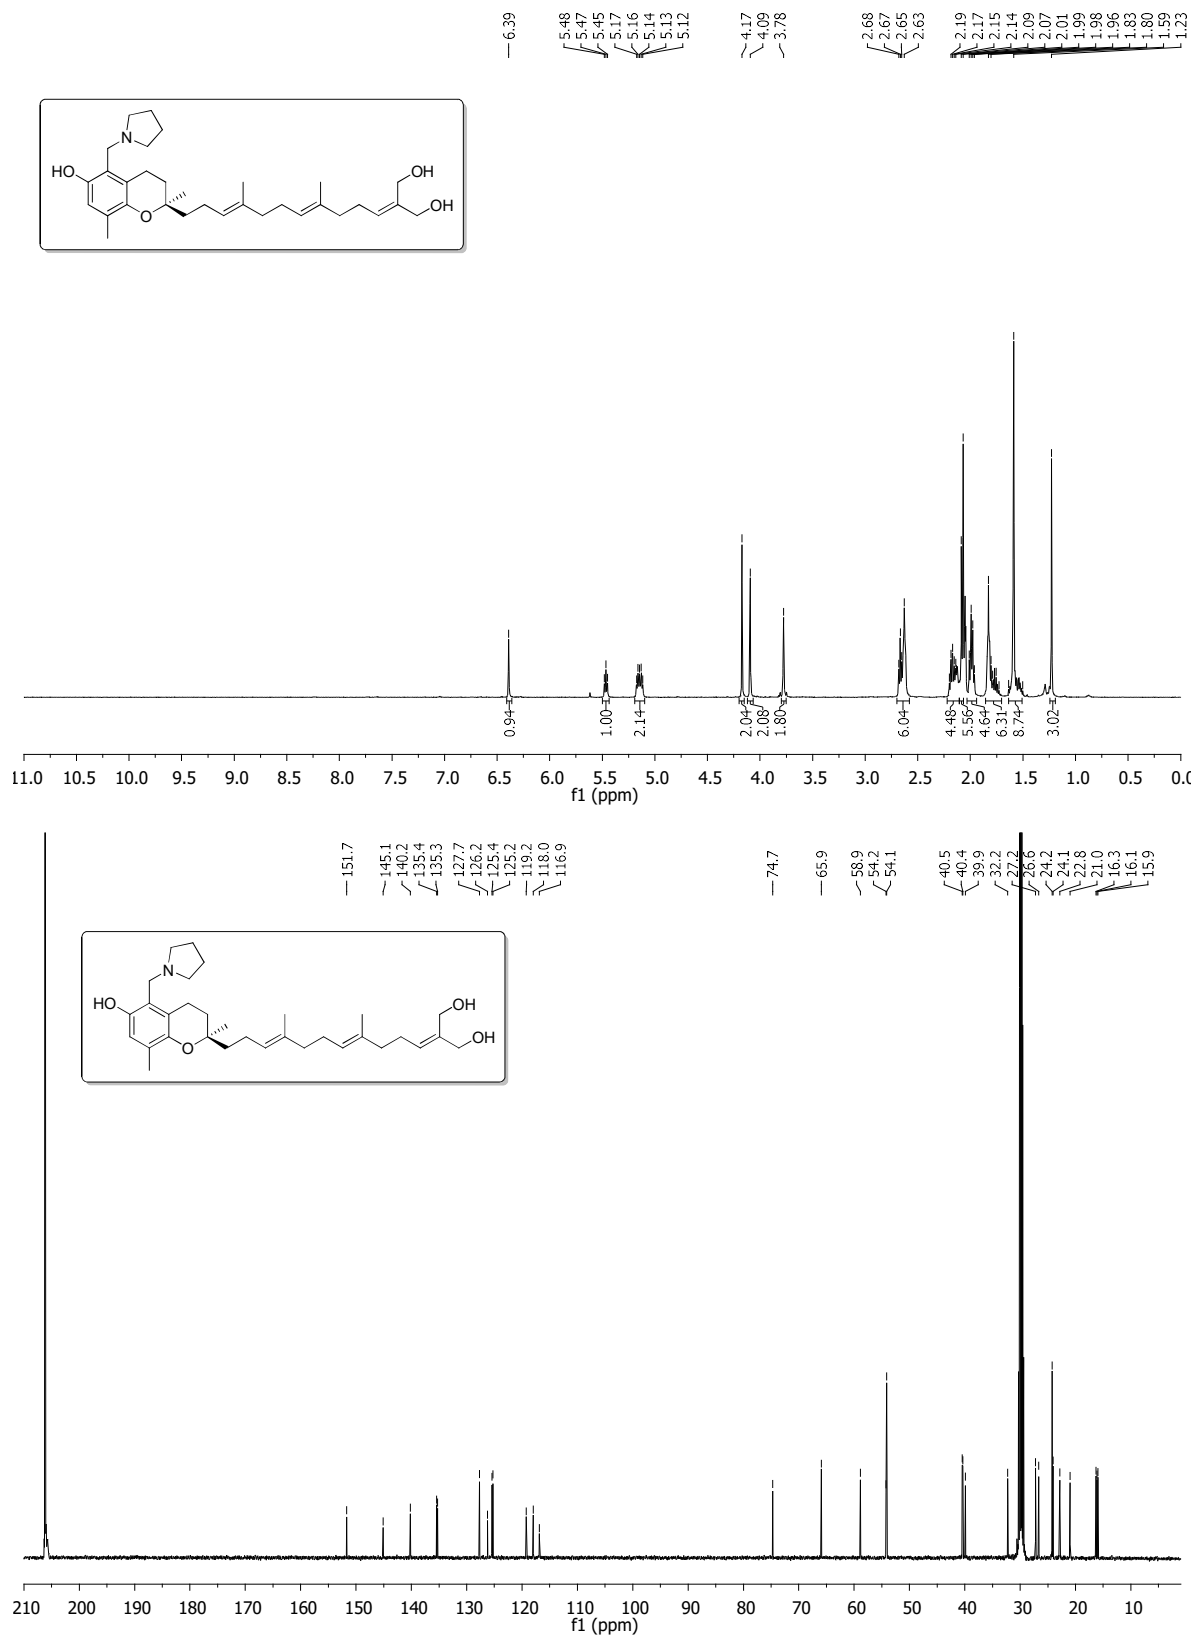

Figure S37. <sup>1</sup>H and <sup>13</sup>C NMR spectra of 35 in acetone-*d*<sub>6</sub>

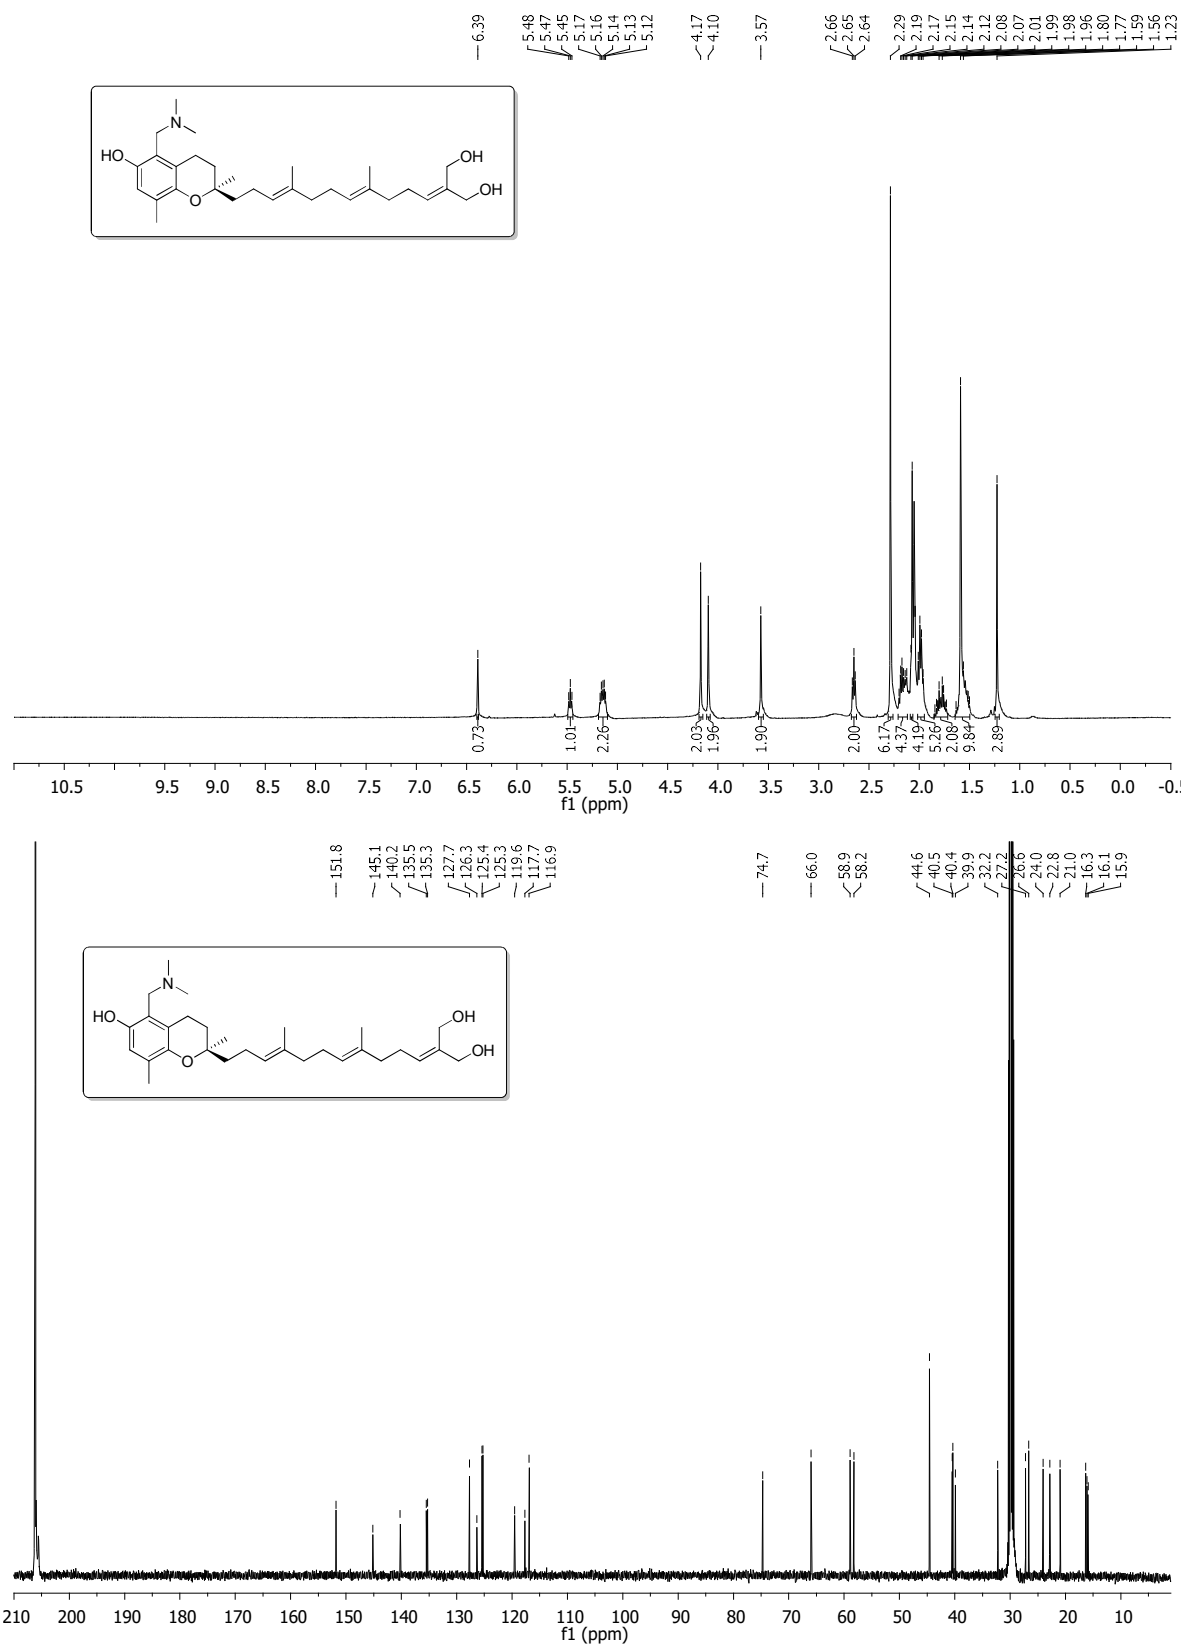

Figure S38. <sup>1</sup>H and <sup>13</sup>C NMR spectra of 36 in acetone-*d*<sub>6</sub>

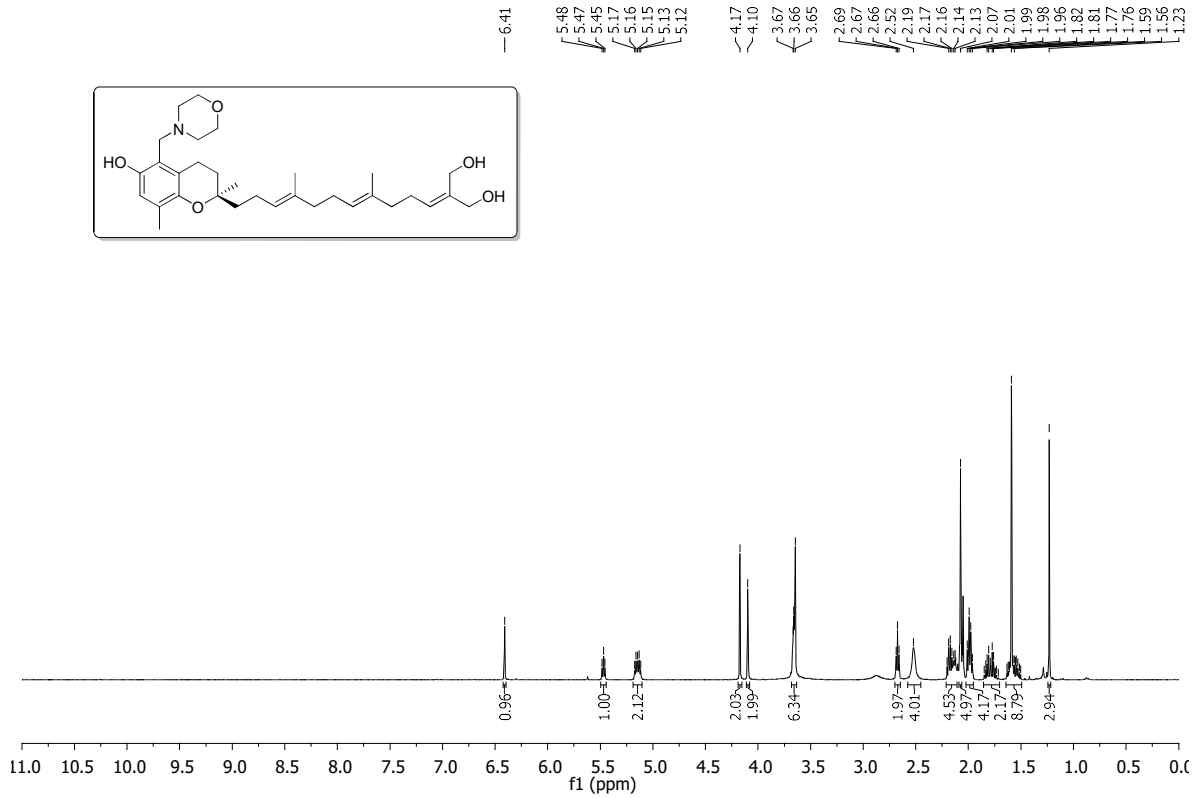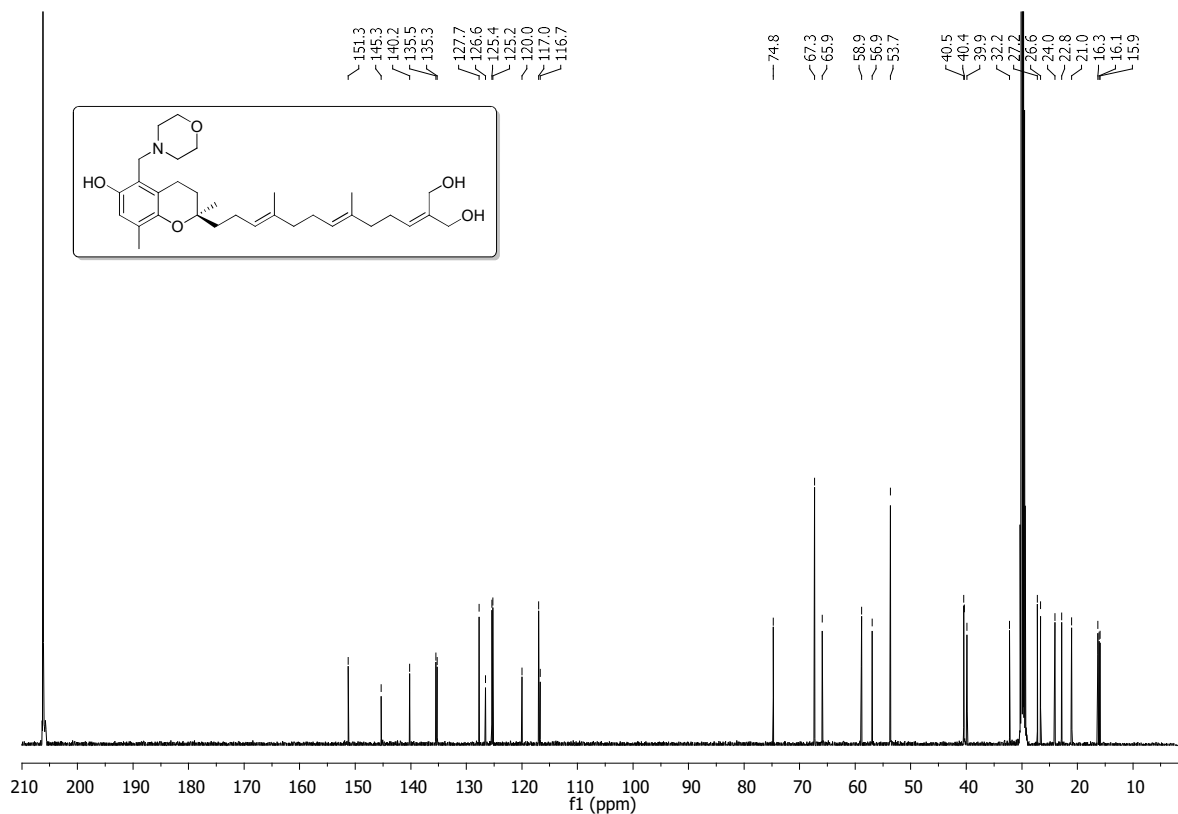

Figure S39. <sup>1</sup>H and <sup>13</sup>C NMR spectra of 37 in acetone-d<sub>6</sub>

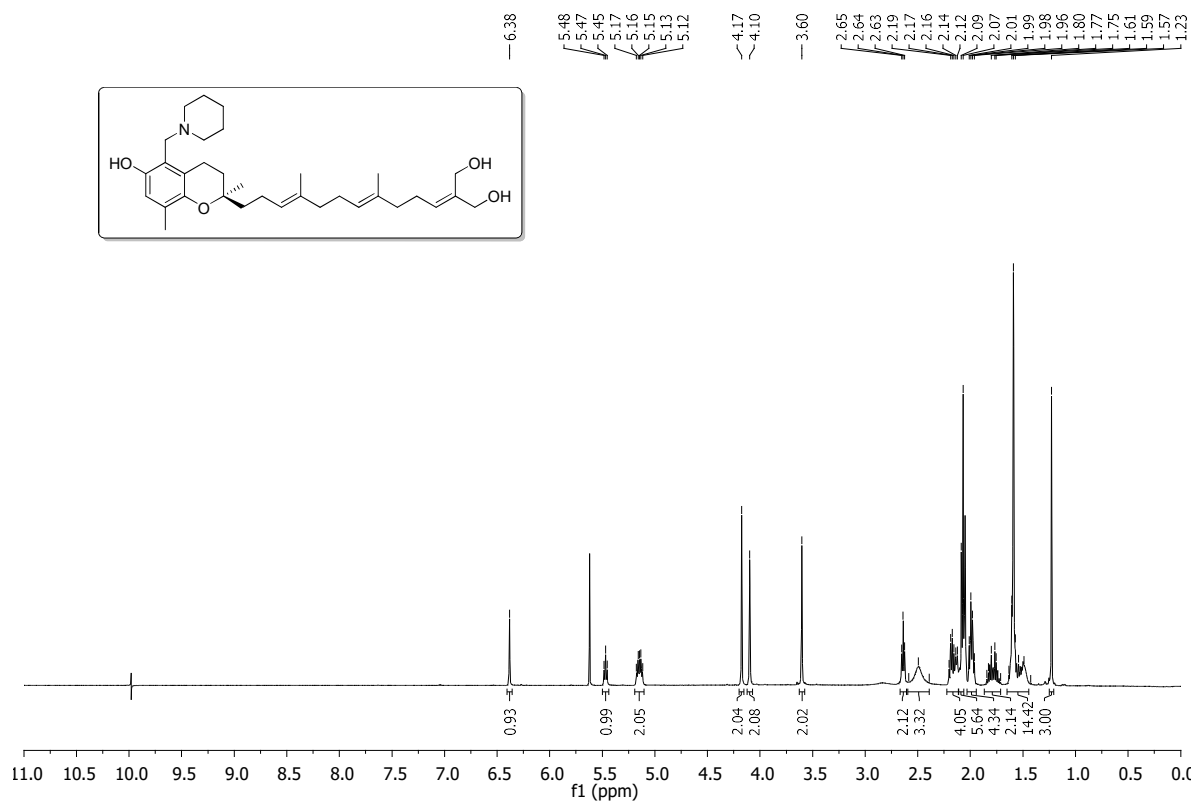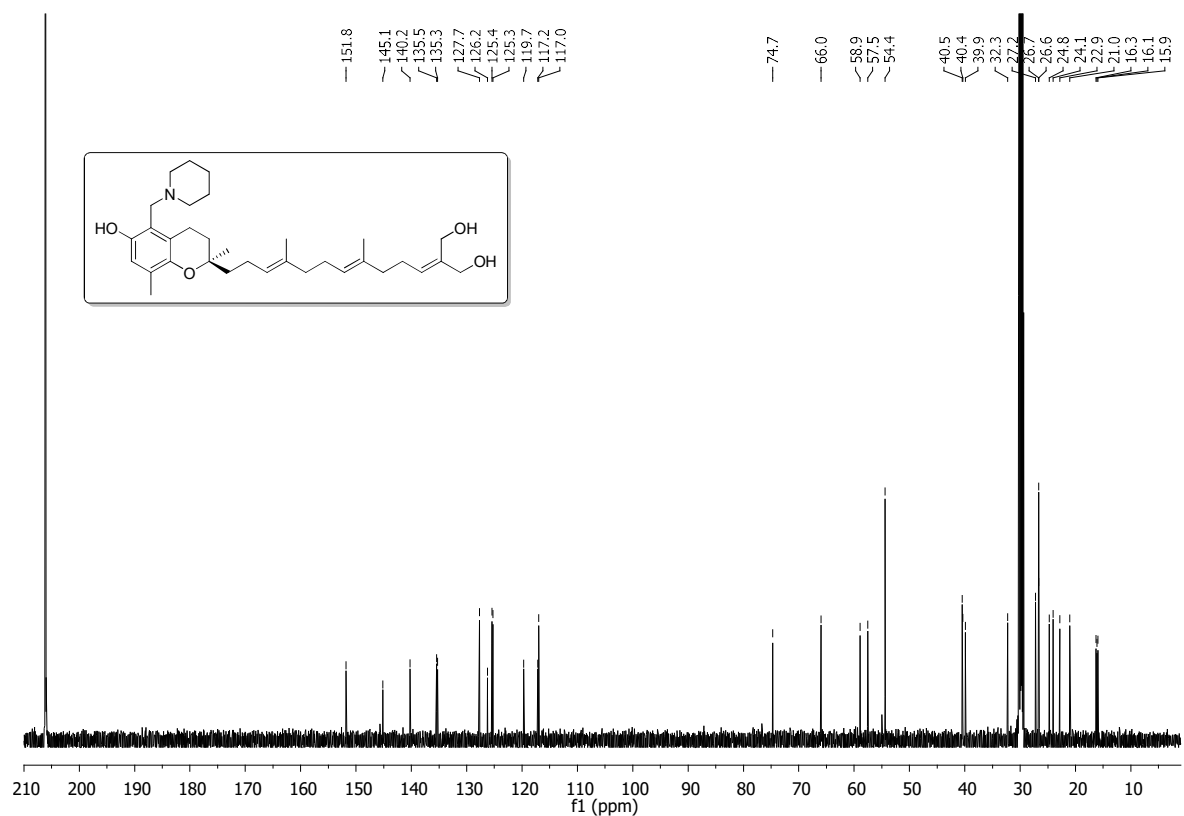

Figure S40. <sup>1</sup>H and <sup>13</sup>C NMR spectra of 38 in acetone-d<sub>6</sub>

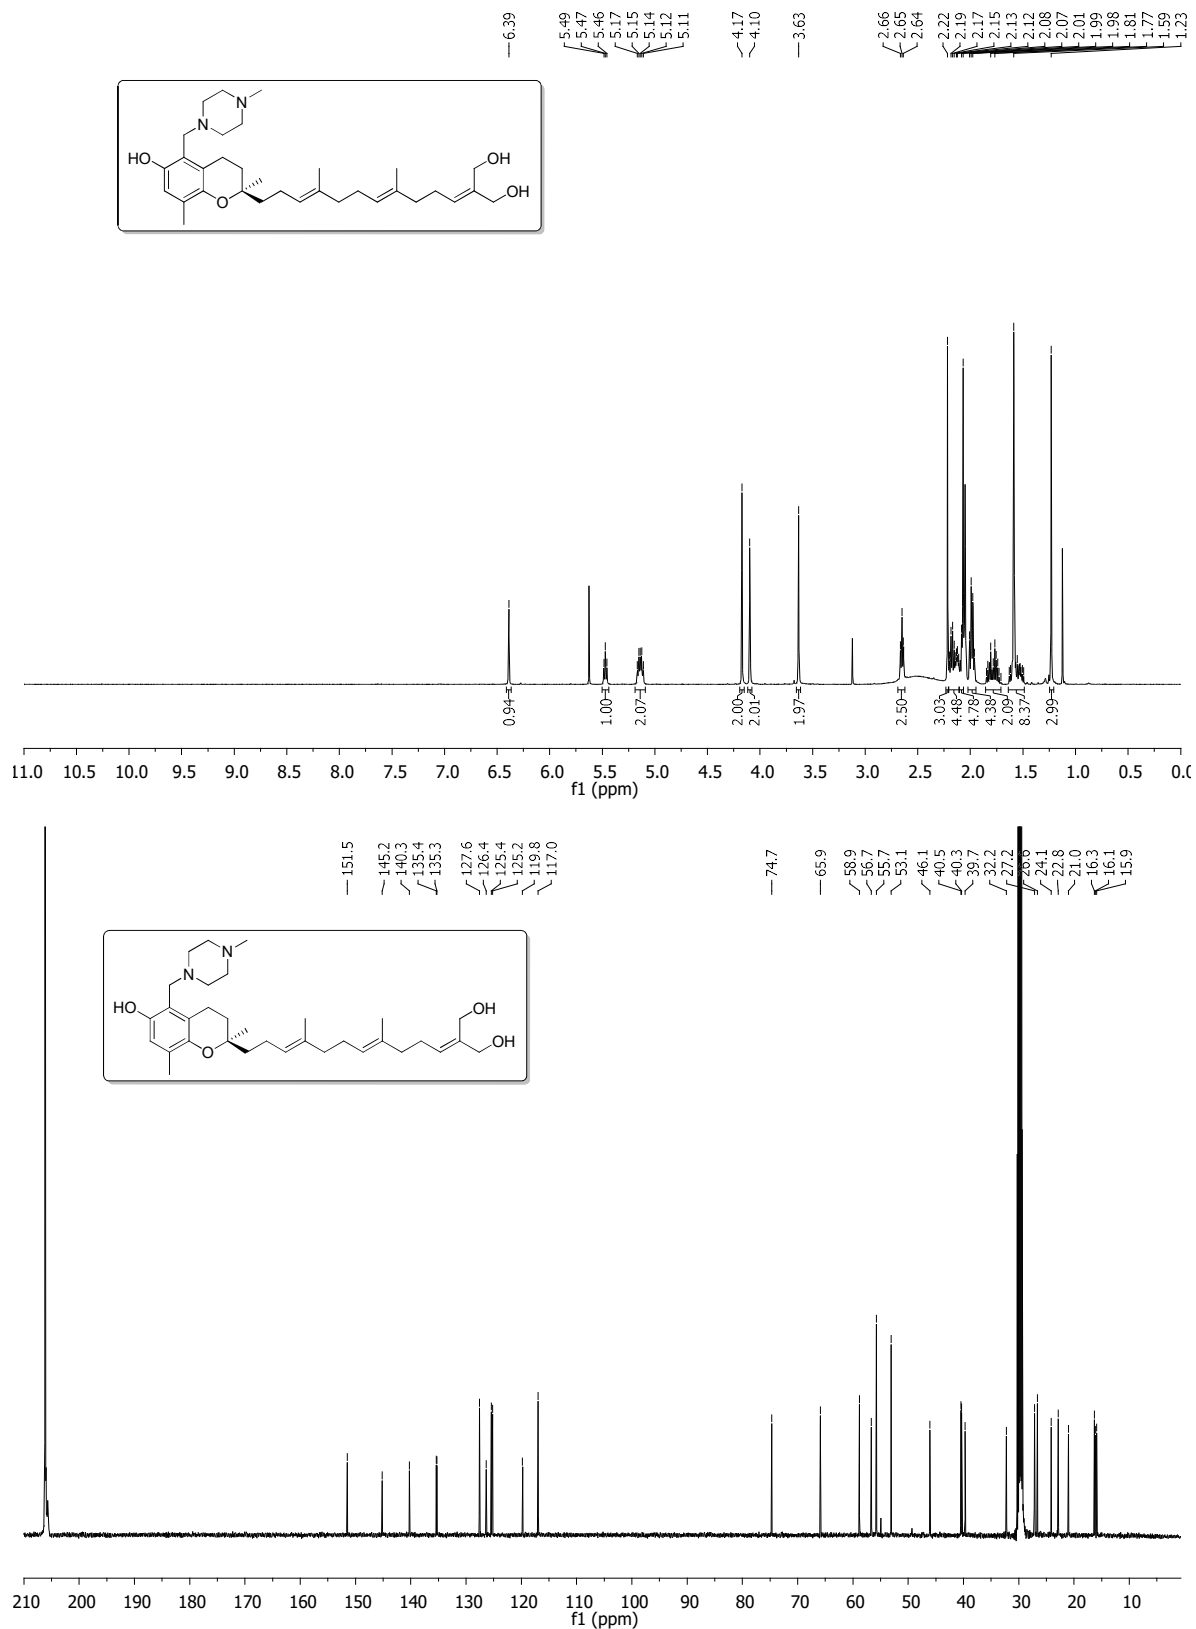

Figure S41. <sup>1</sup>H and <sup>13</sup>C NMR spectra of **39** in acetone-*d*<sub>6</sub>

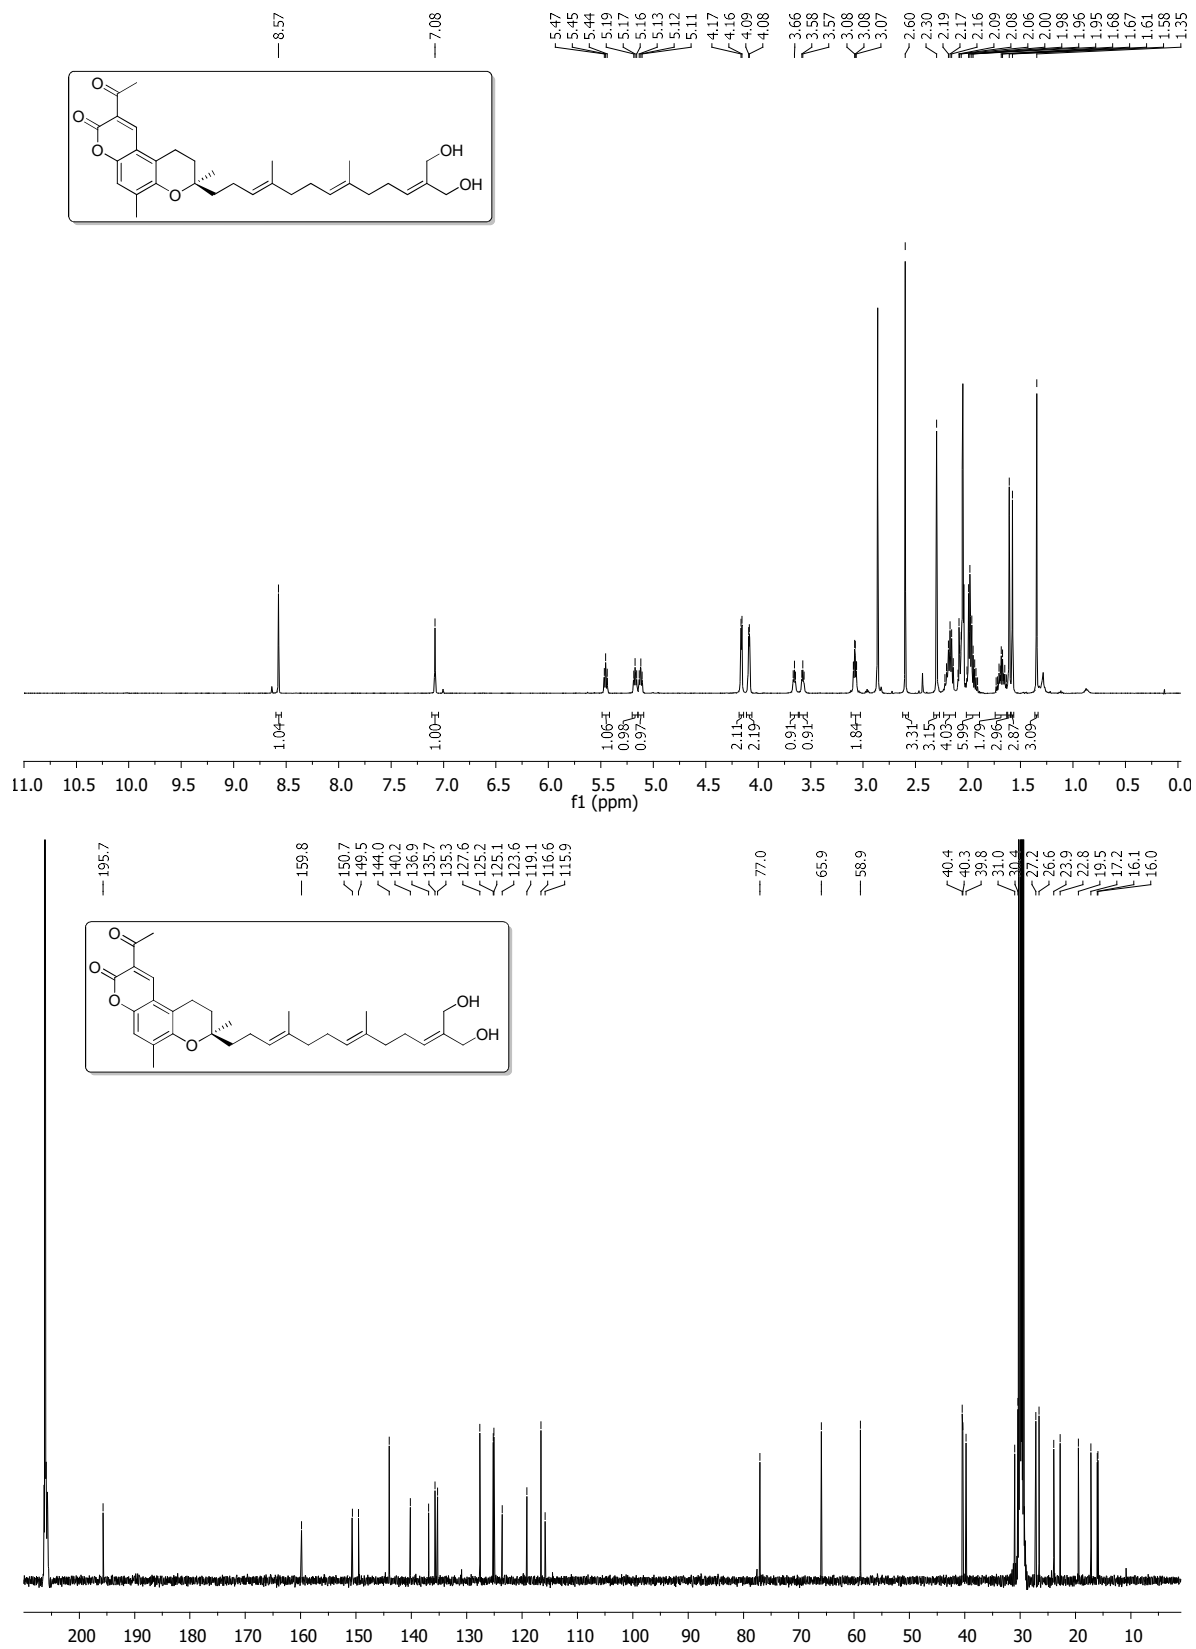

Figure S42. <sup>1</sup>H and <sup>13</sup>C NMR spectra of 42 in acetone-*d*<sub>6</sub>

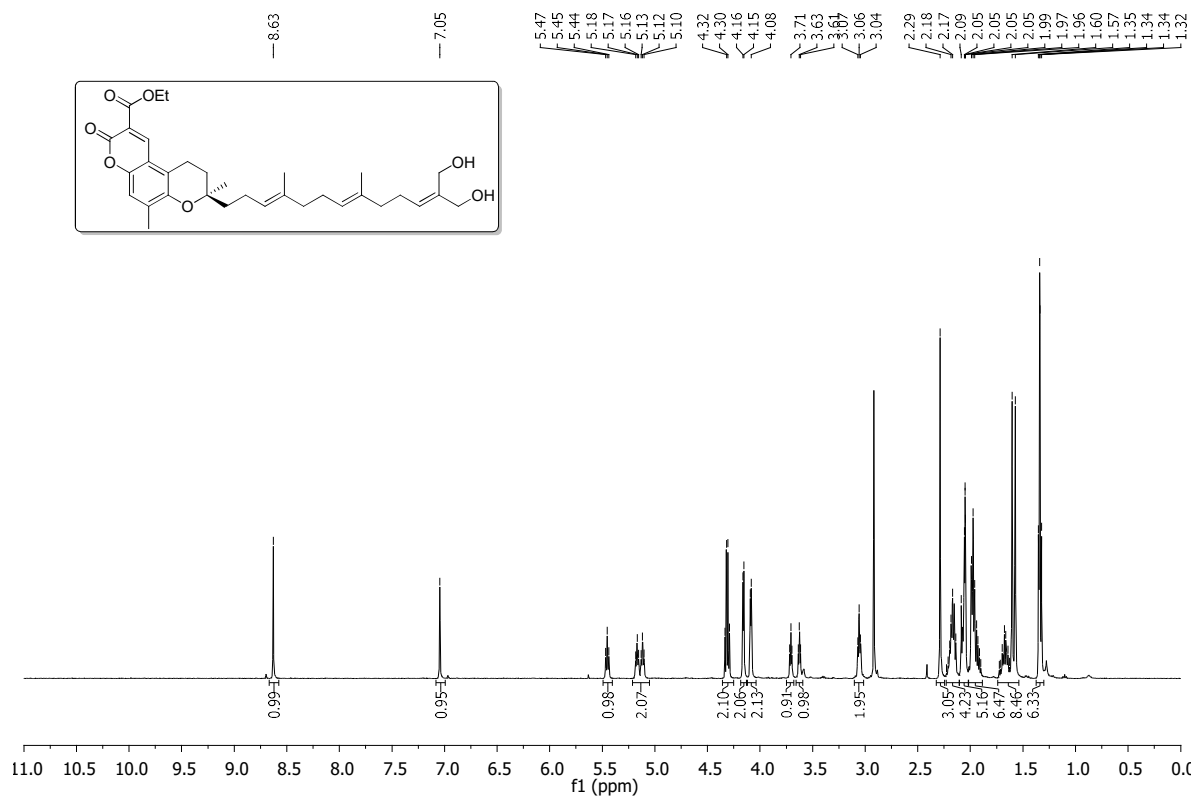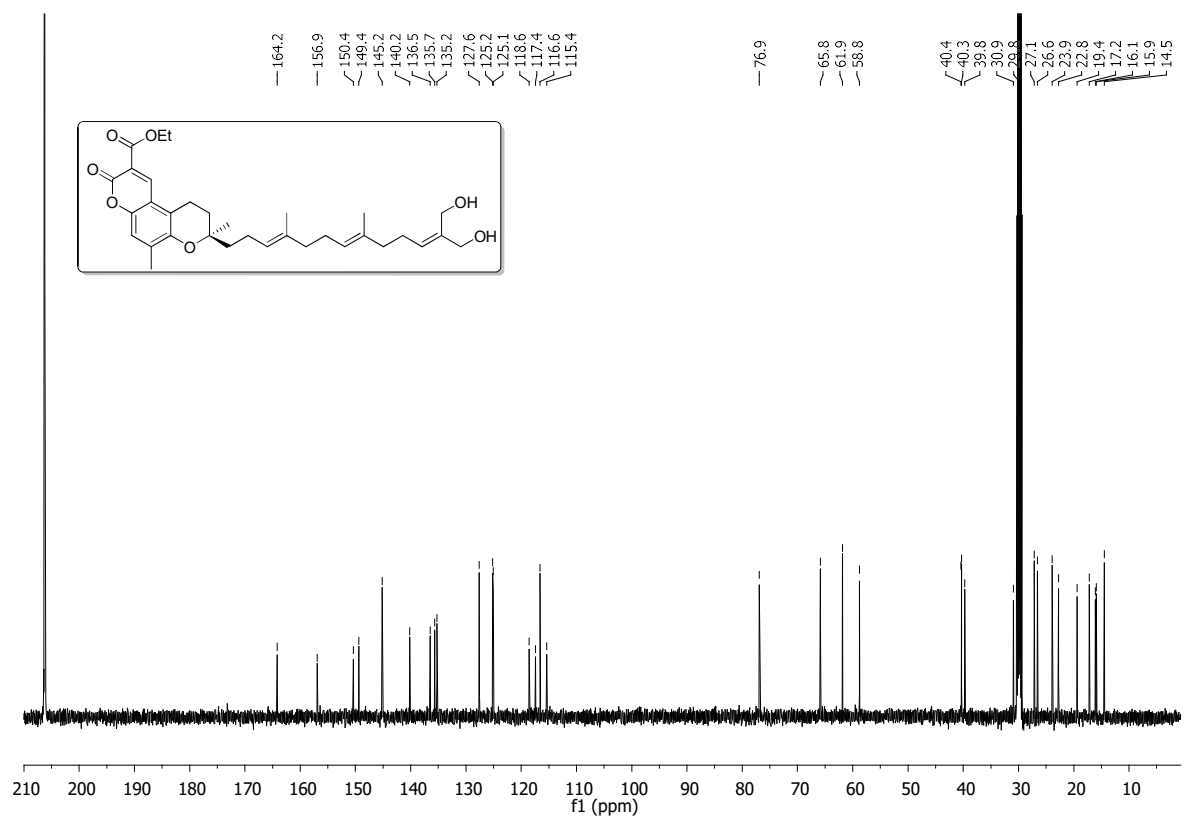

Figure S43. <sup>1</sup>H and <sup>13</sup>C NMR spectra of 43 in acetone-*d*<sub>6</sub>



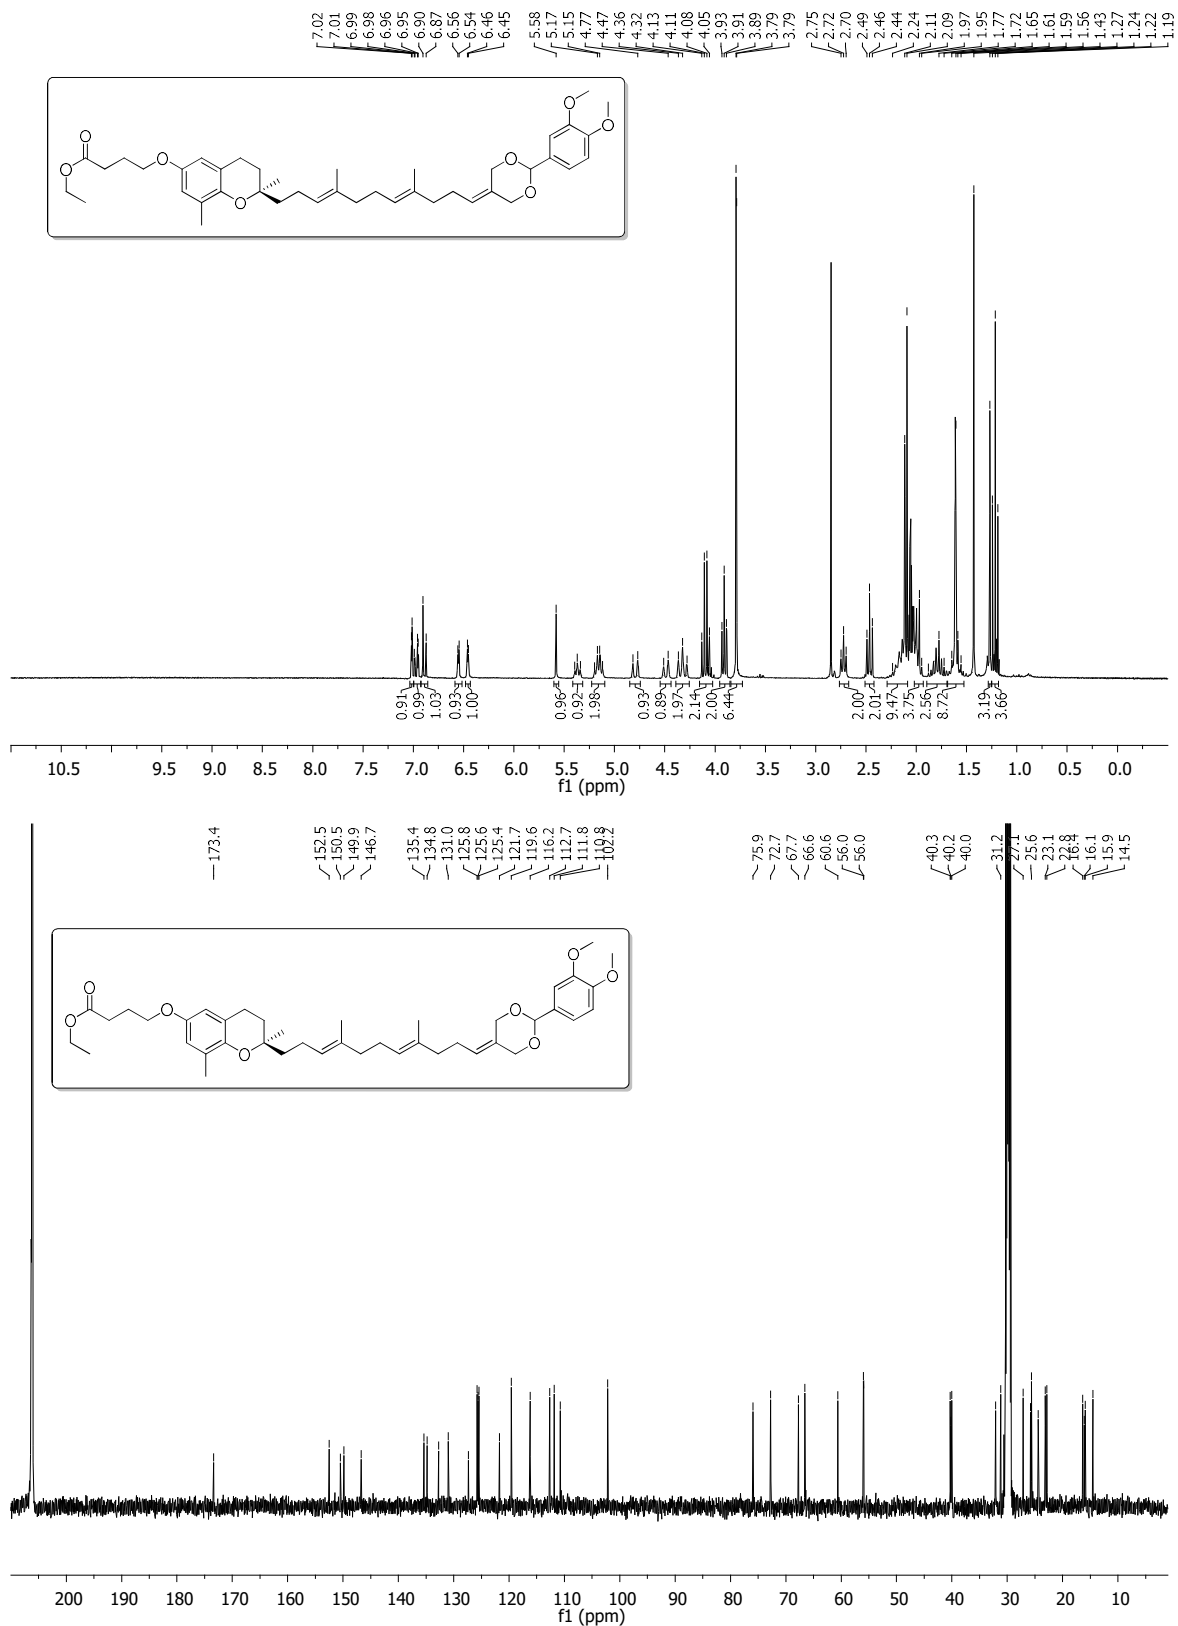

Figure S44. <sup>1</sup>H and <sup>13</sup>C NMR spectra of 67 in acetone-*d*<sub>6</sub>

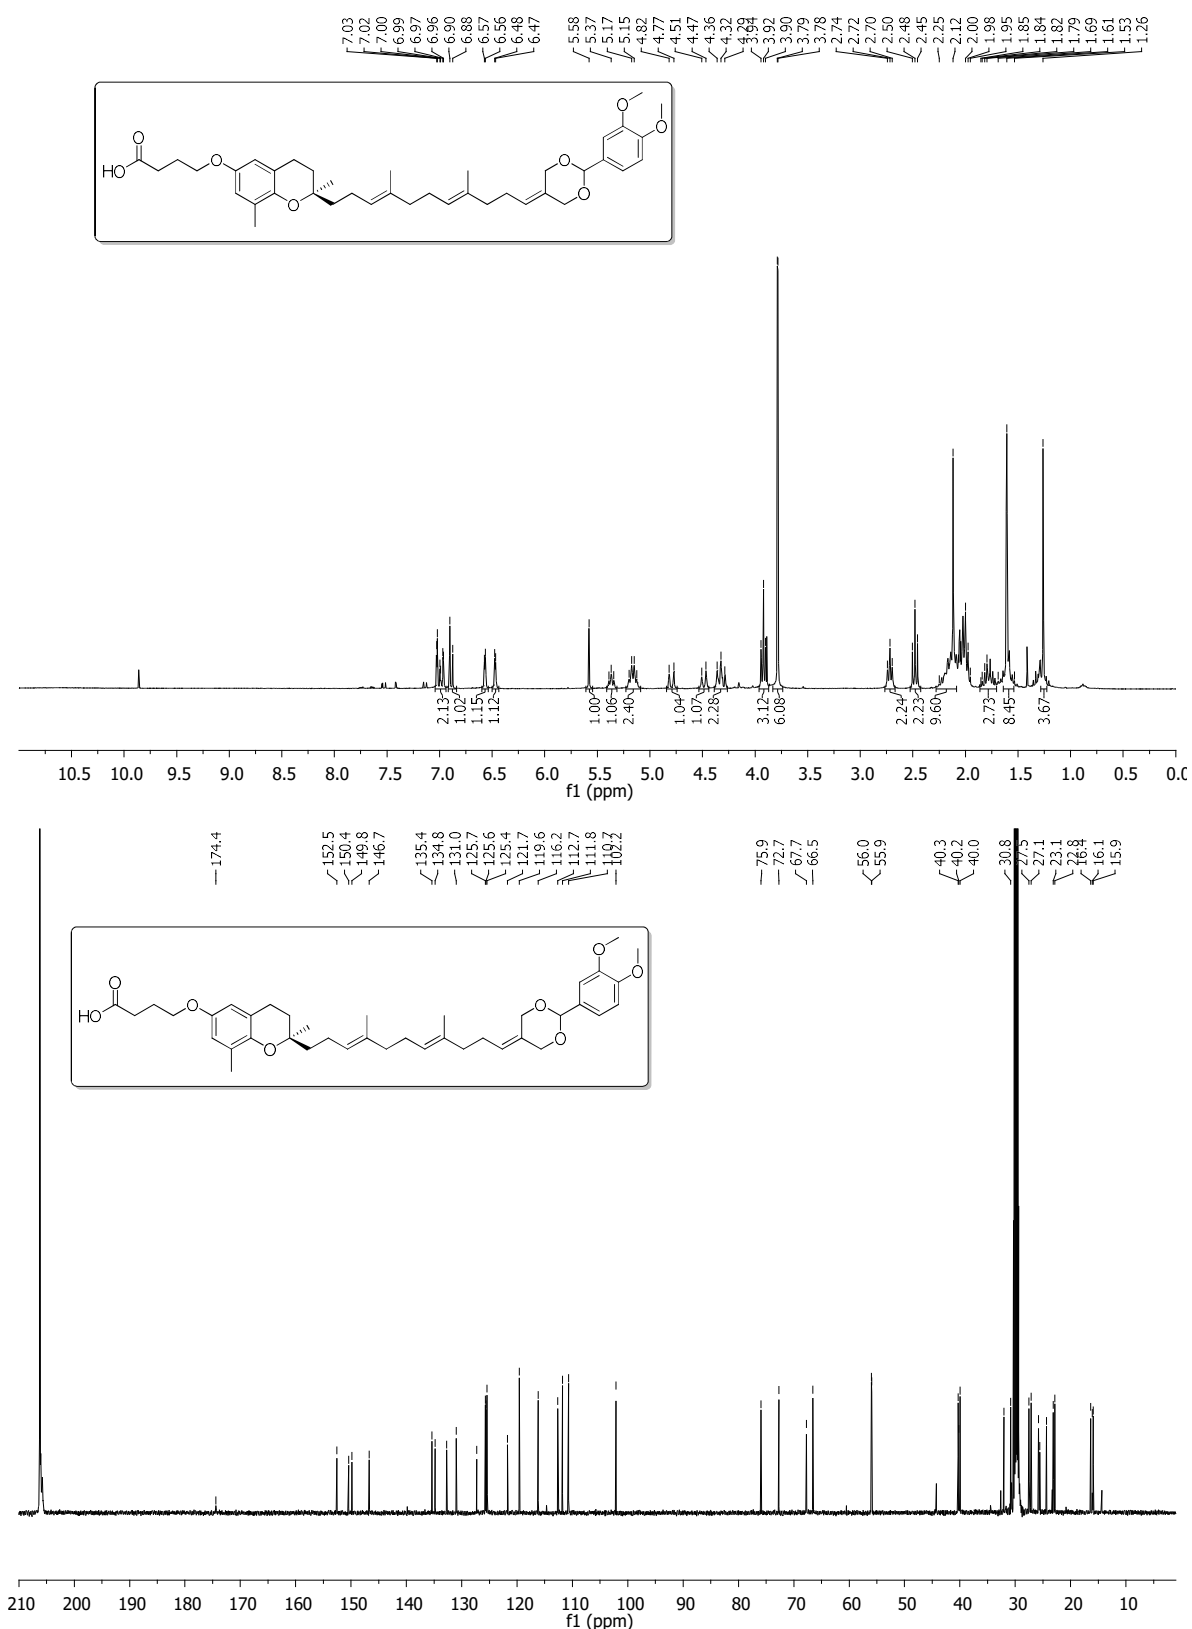

Figure S45. <sup>1</sup>H and <sup>13</sup>C NMR spectra of 31 in acetone-d<sub>6</sub>

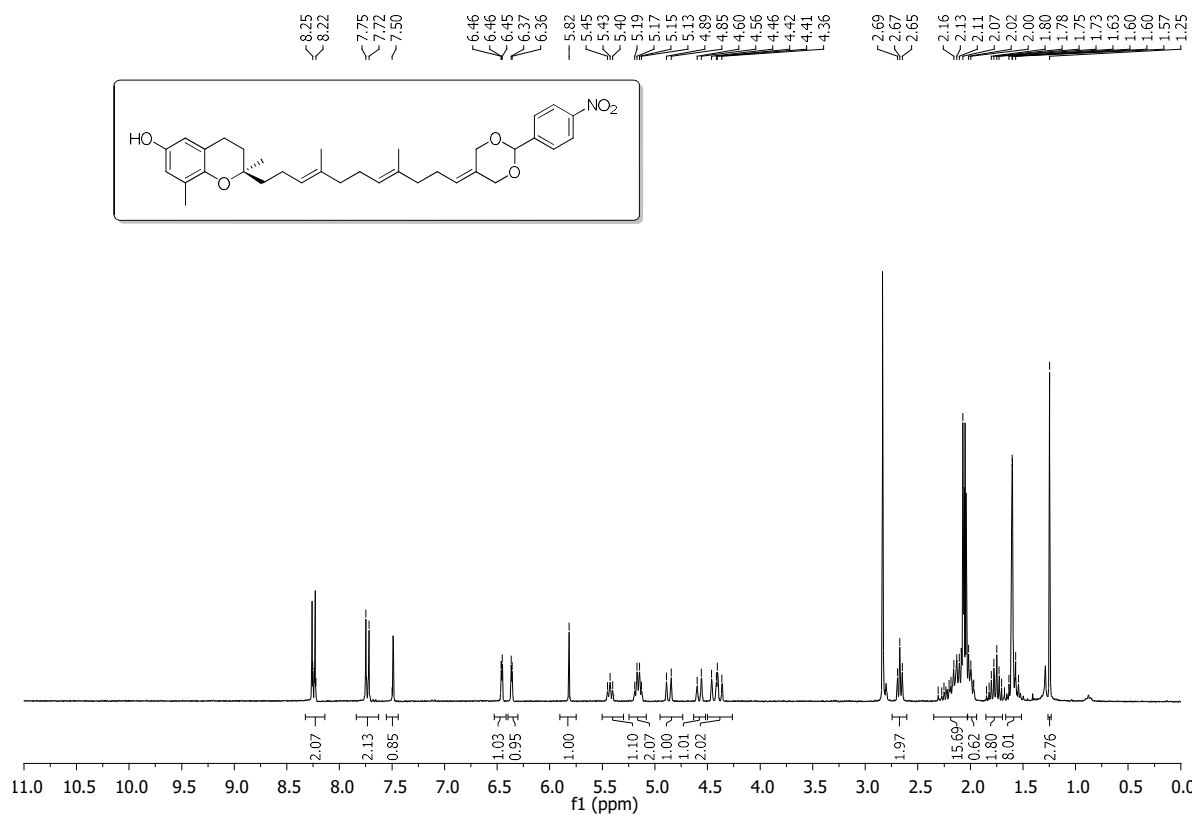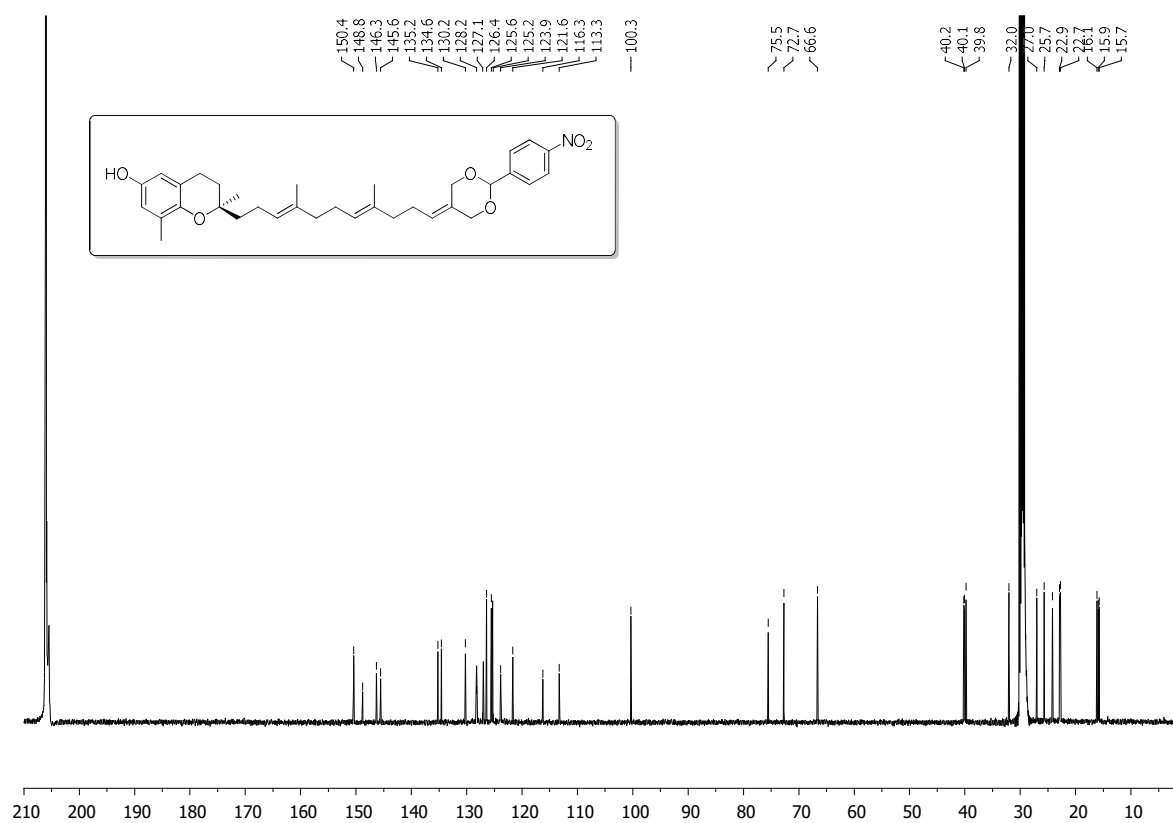

Figure S46. <sup>1</sup>H and <sup>13</sup>C NMR spectra of 70 in acetone-*d*<sub>6</sub>

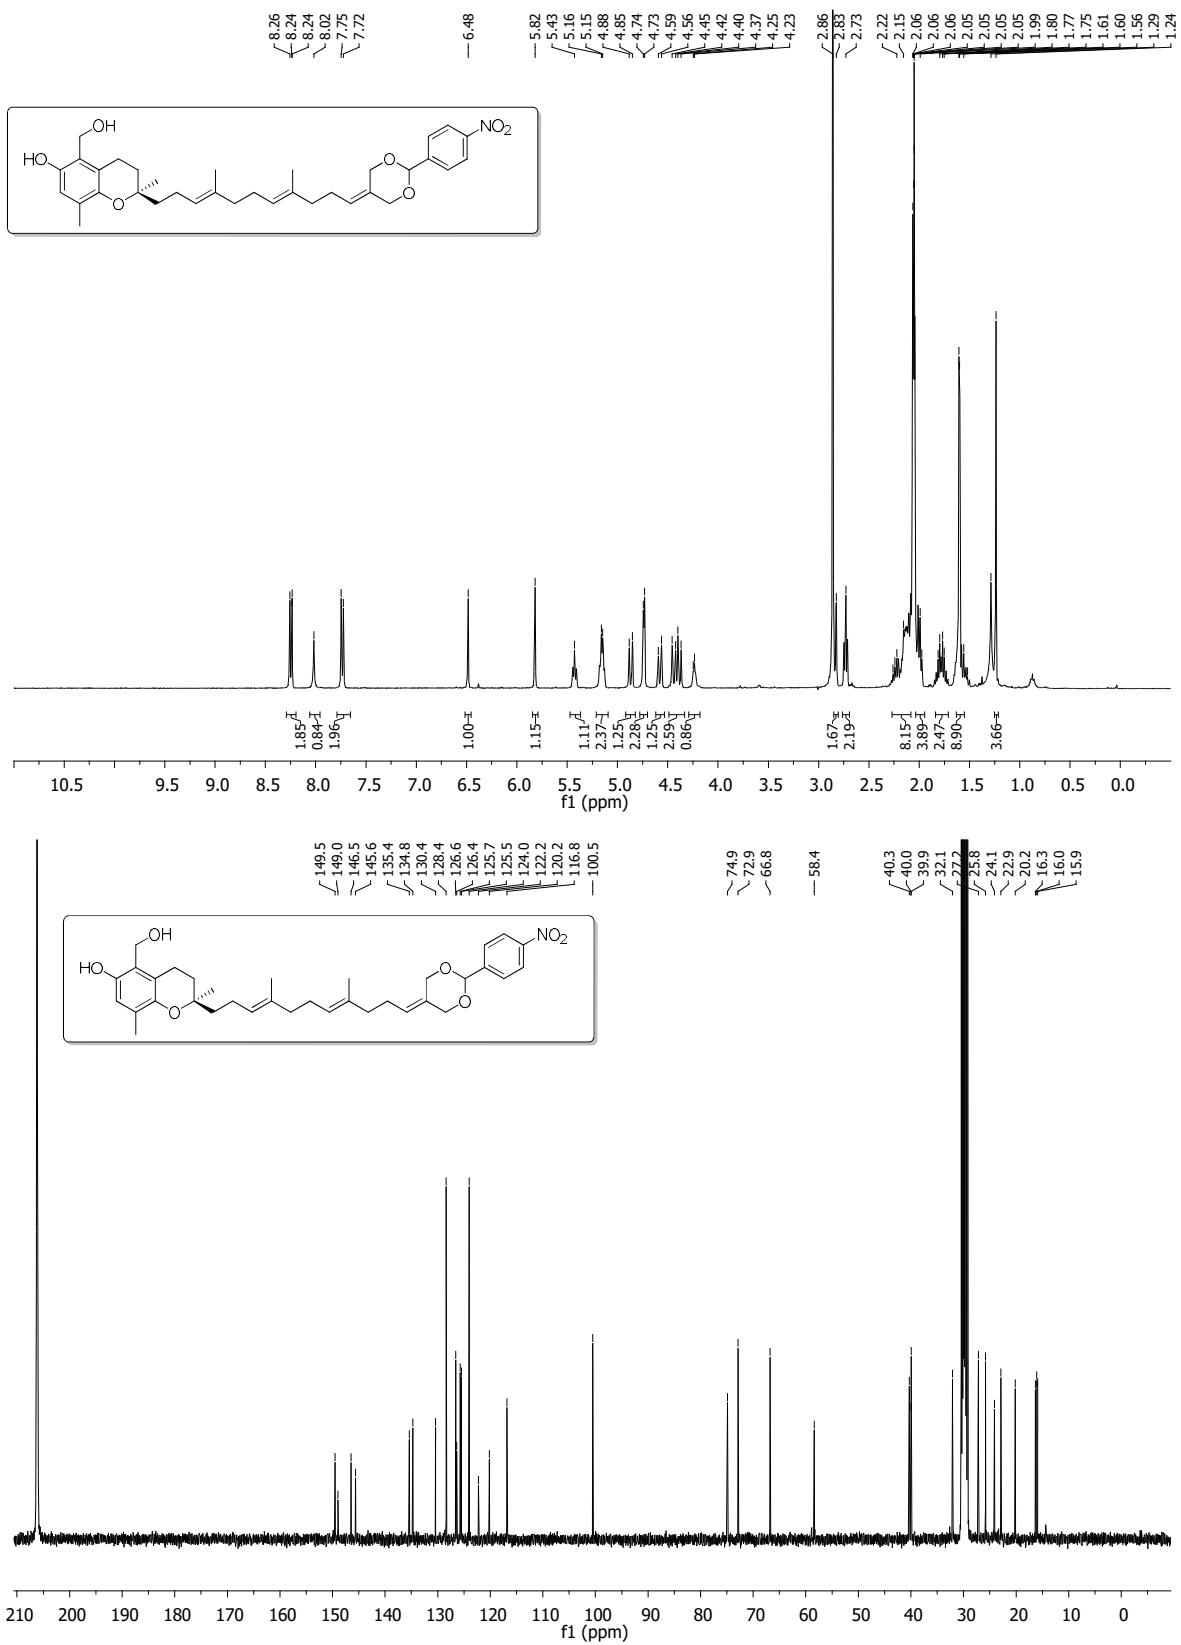

Figure S47. <sup>1</sup>H and <sup>13</sup>C NMR spectra of 48 in acetone-*d*<sub>6</sub>

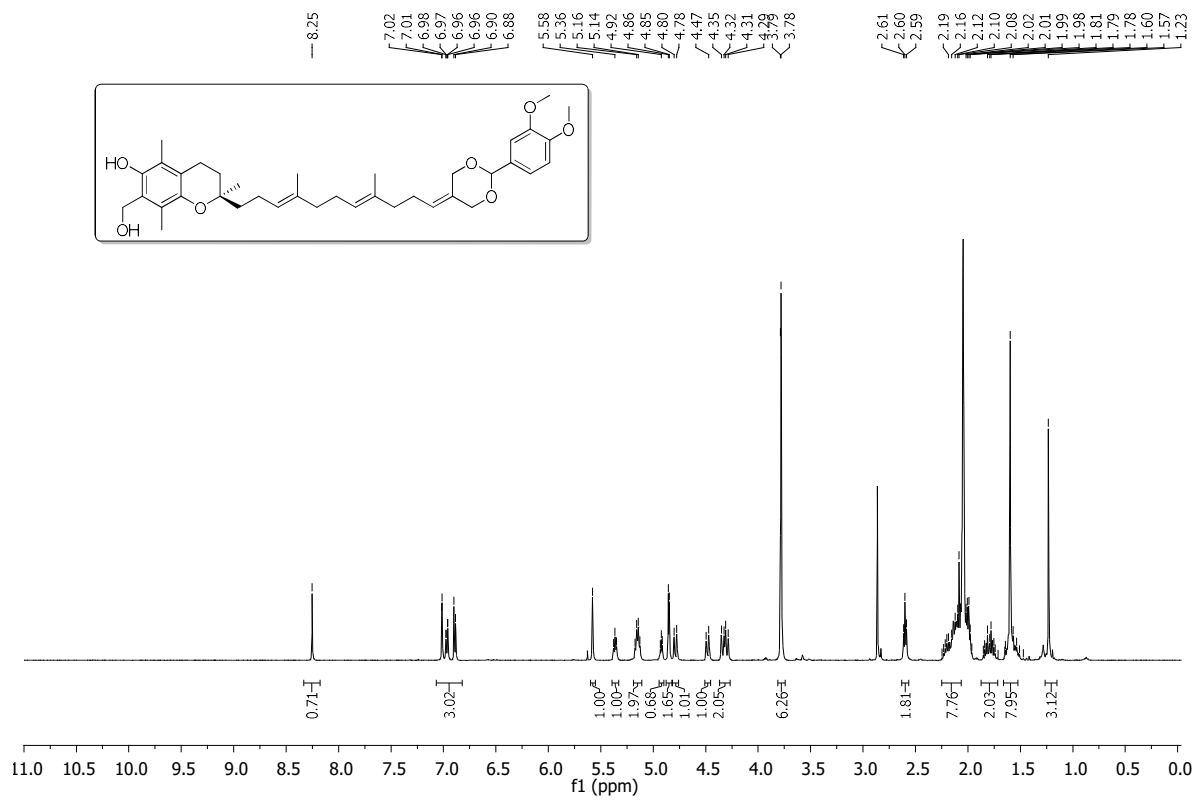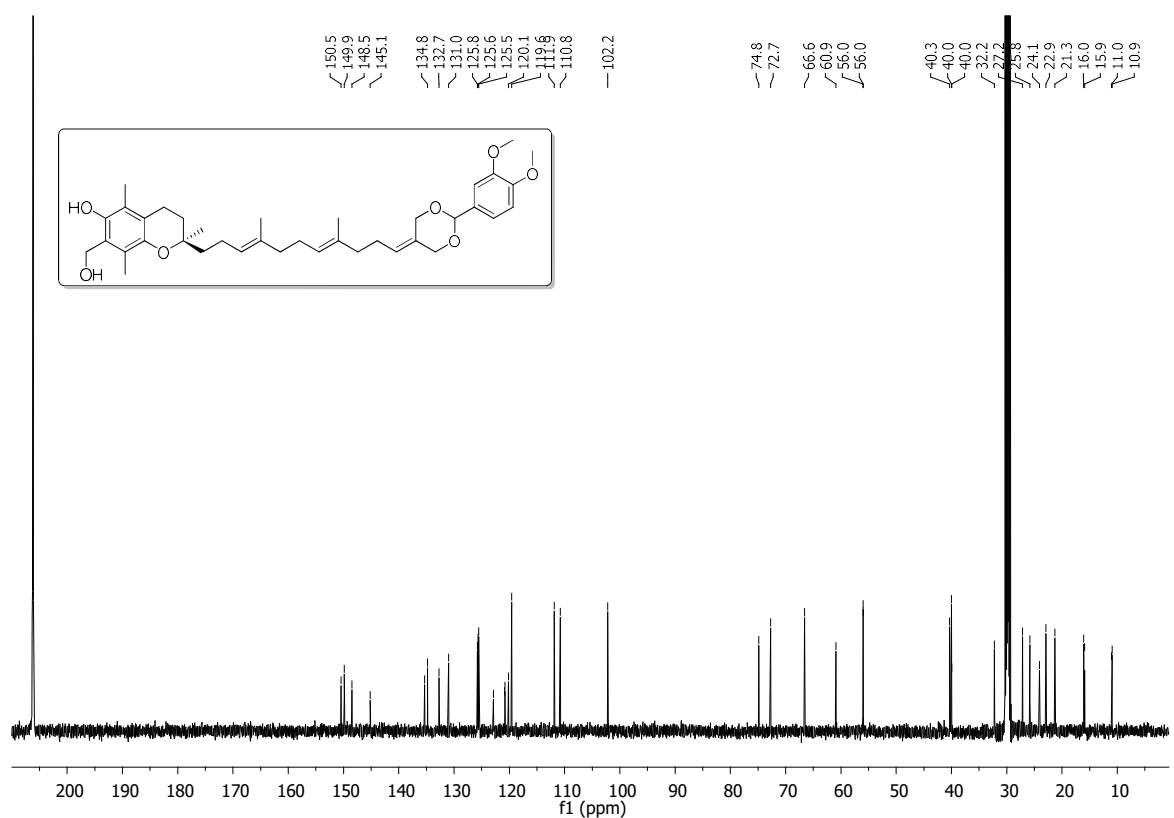

Figure S48. <sup>1</sup>H and <sup>13</sup>C NMR spectra of 46 in acetone-*d*<sub>6</sub>

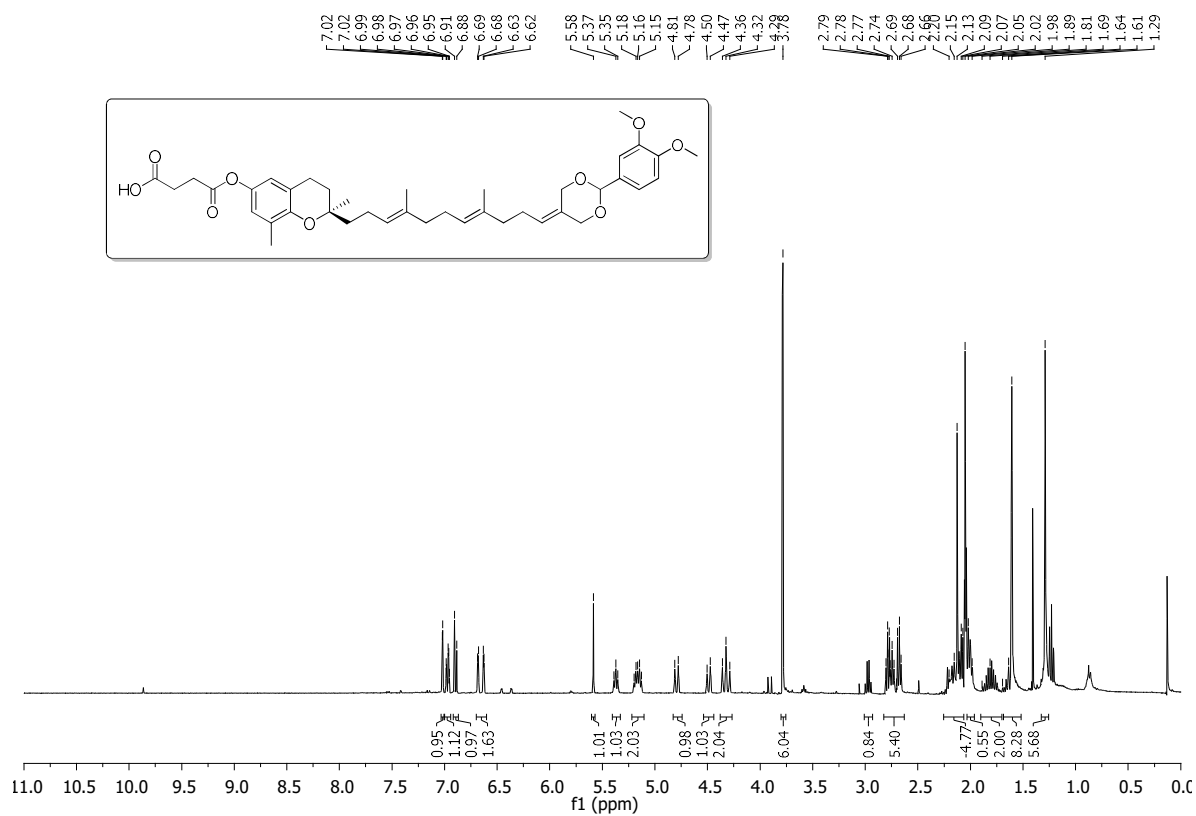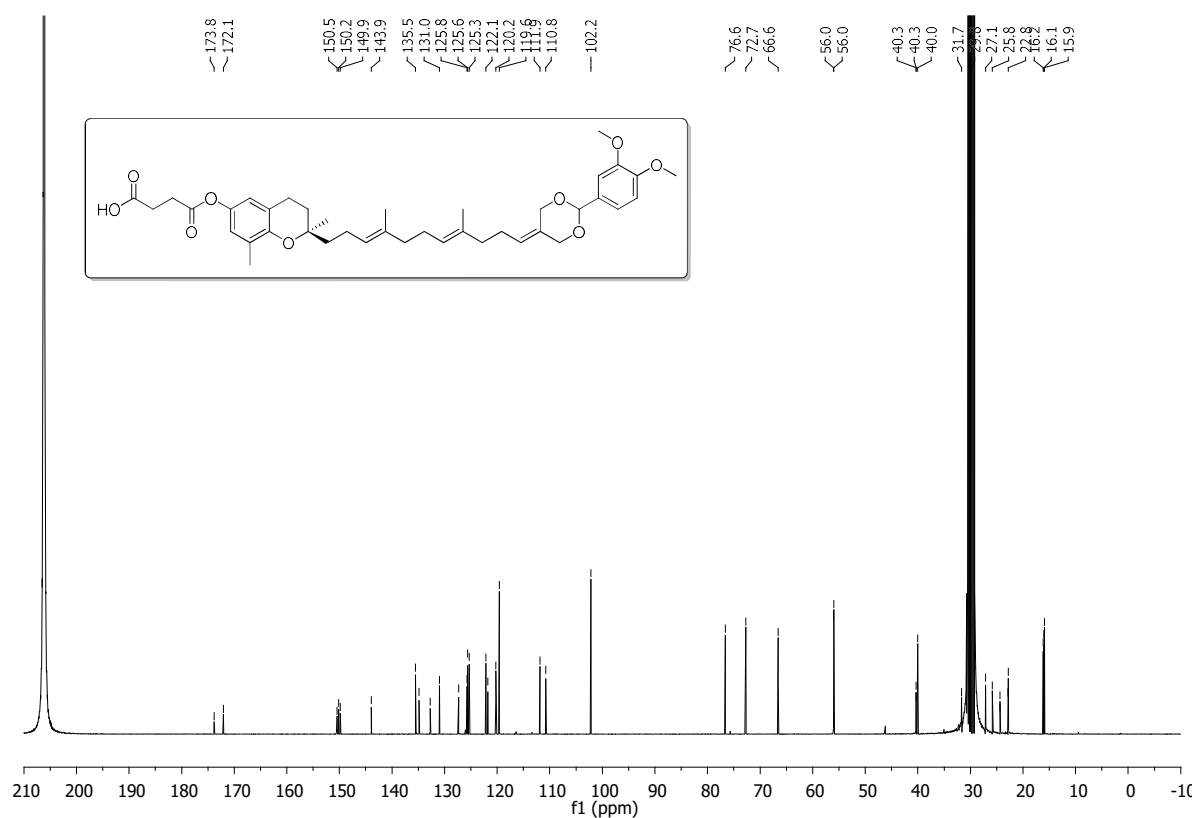

Figure S49. <sup>1</sup>H and <sup>13</sup>C NMR spectra of 68 in acetone-*d*<sub>6</sub>

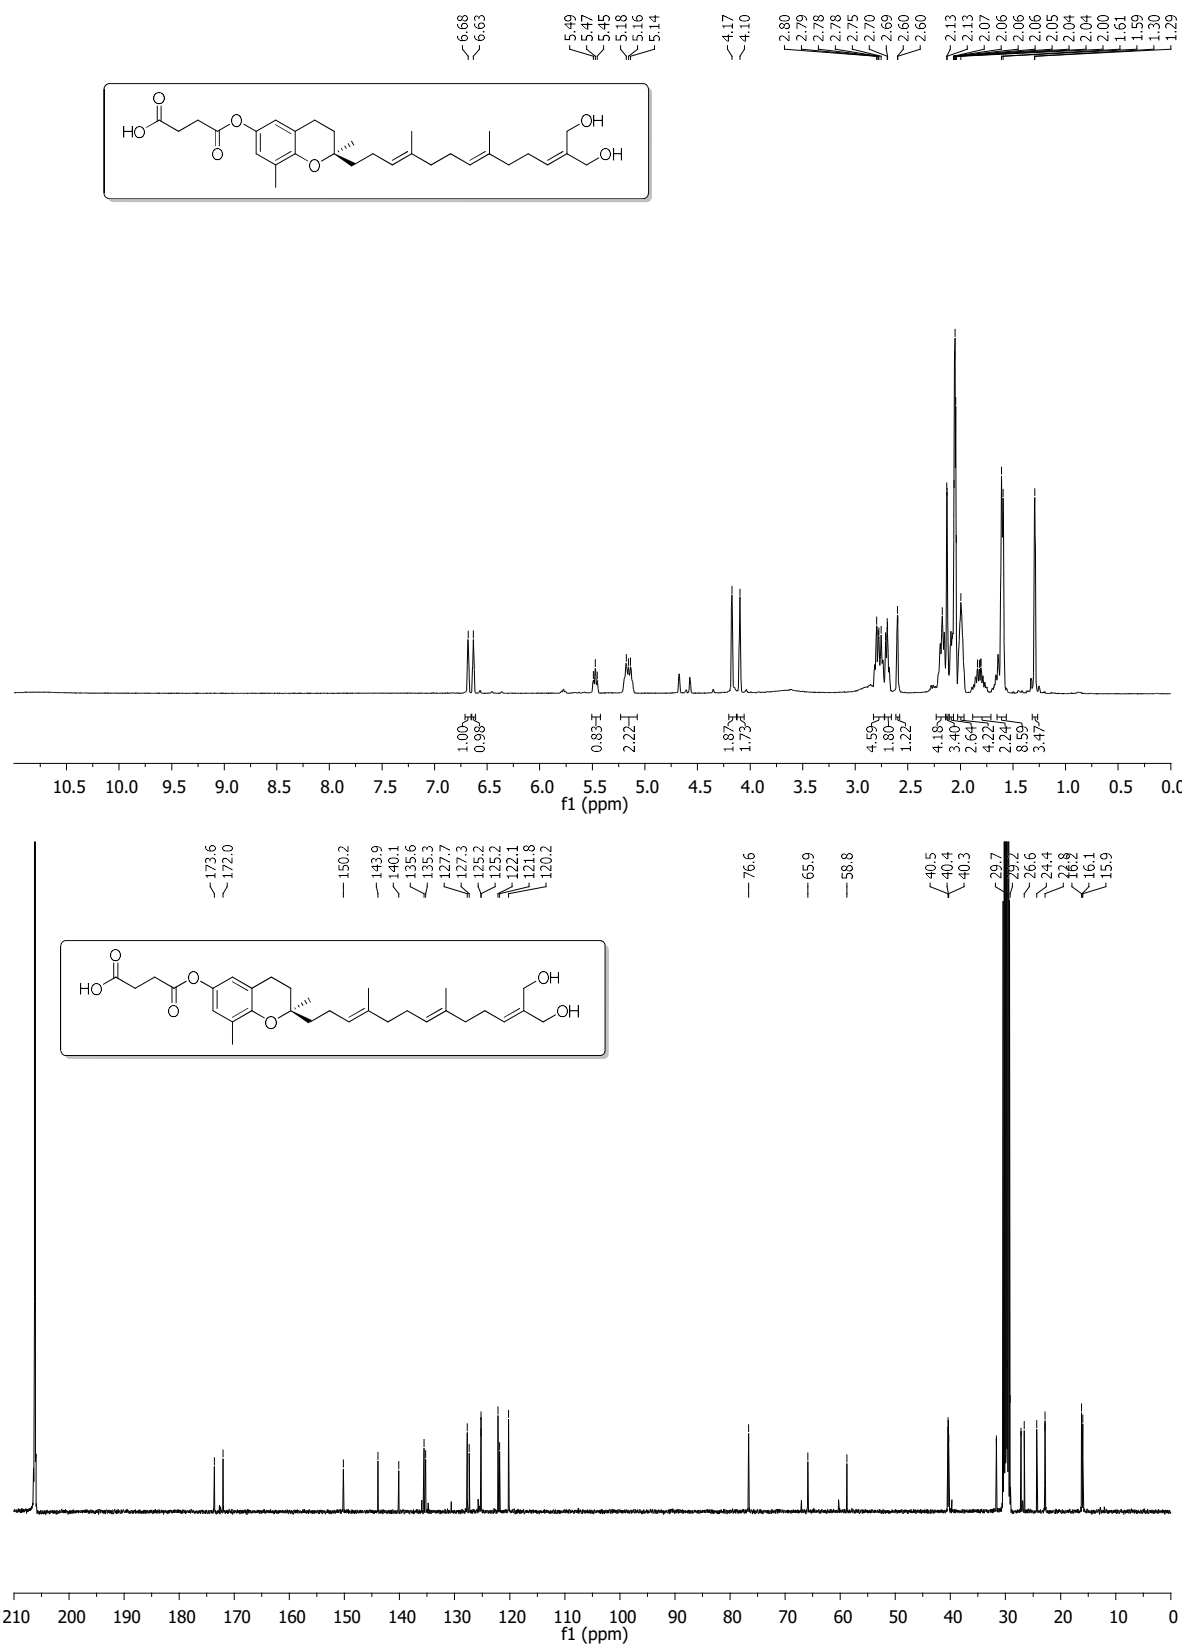

Figure S50. <sup>1</sup>H and <sup>13</sup>C NMR spectra of 31 in acetone-*d*<sub>6</sub>

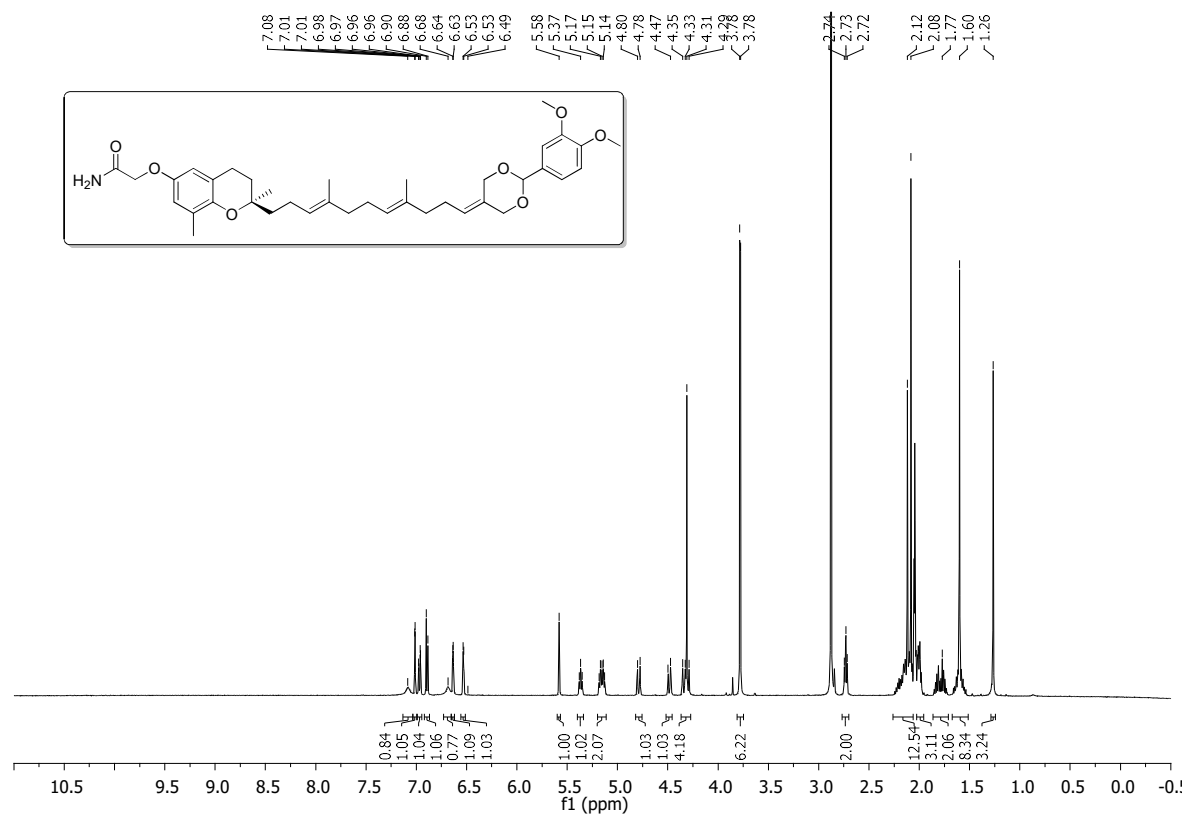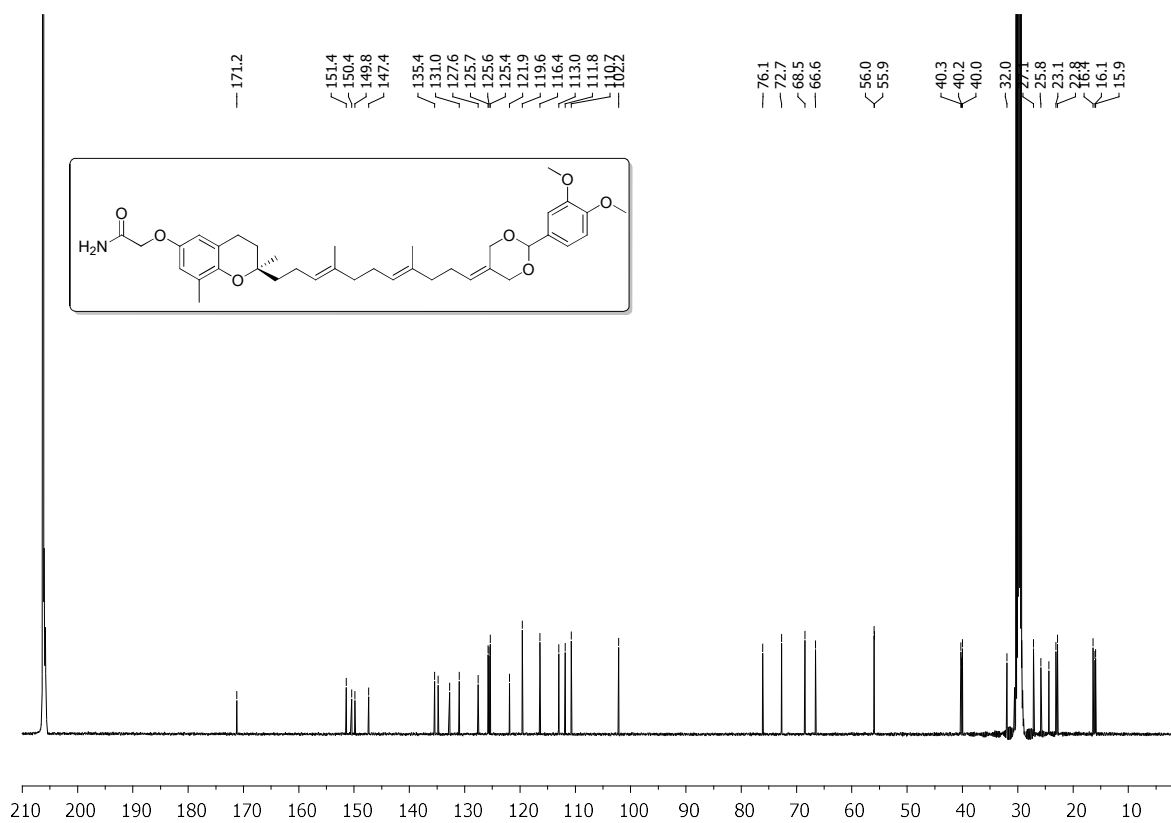

Figure S51. <sup>1</sup>H and <sup>13</sup>C NMR spectra of 69 in acetone-*d*<sub>6</sub>



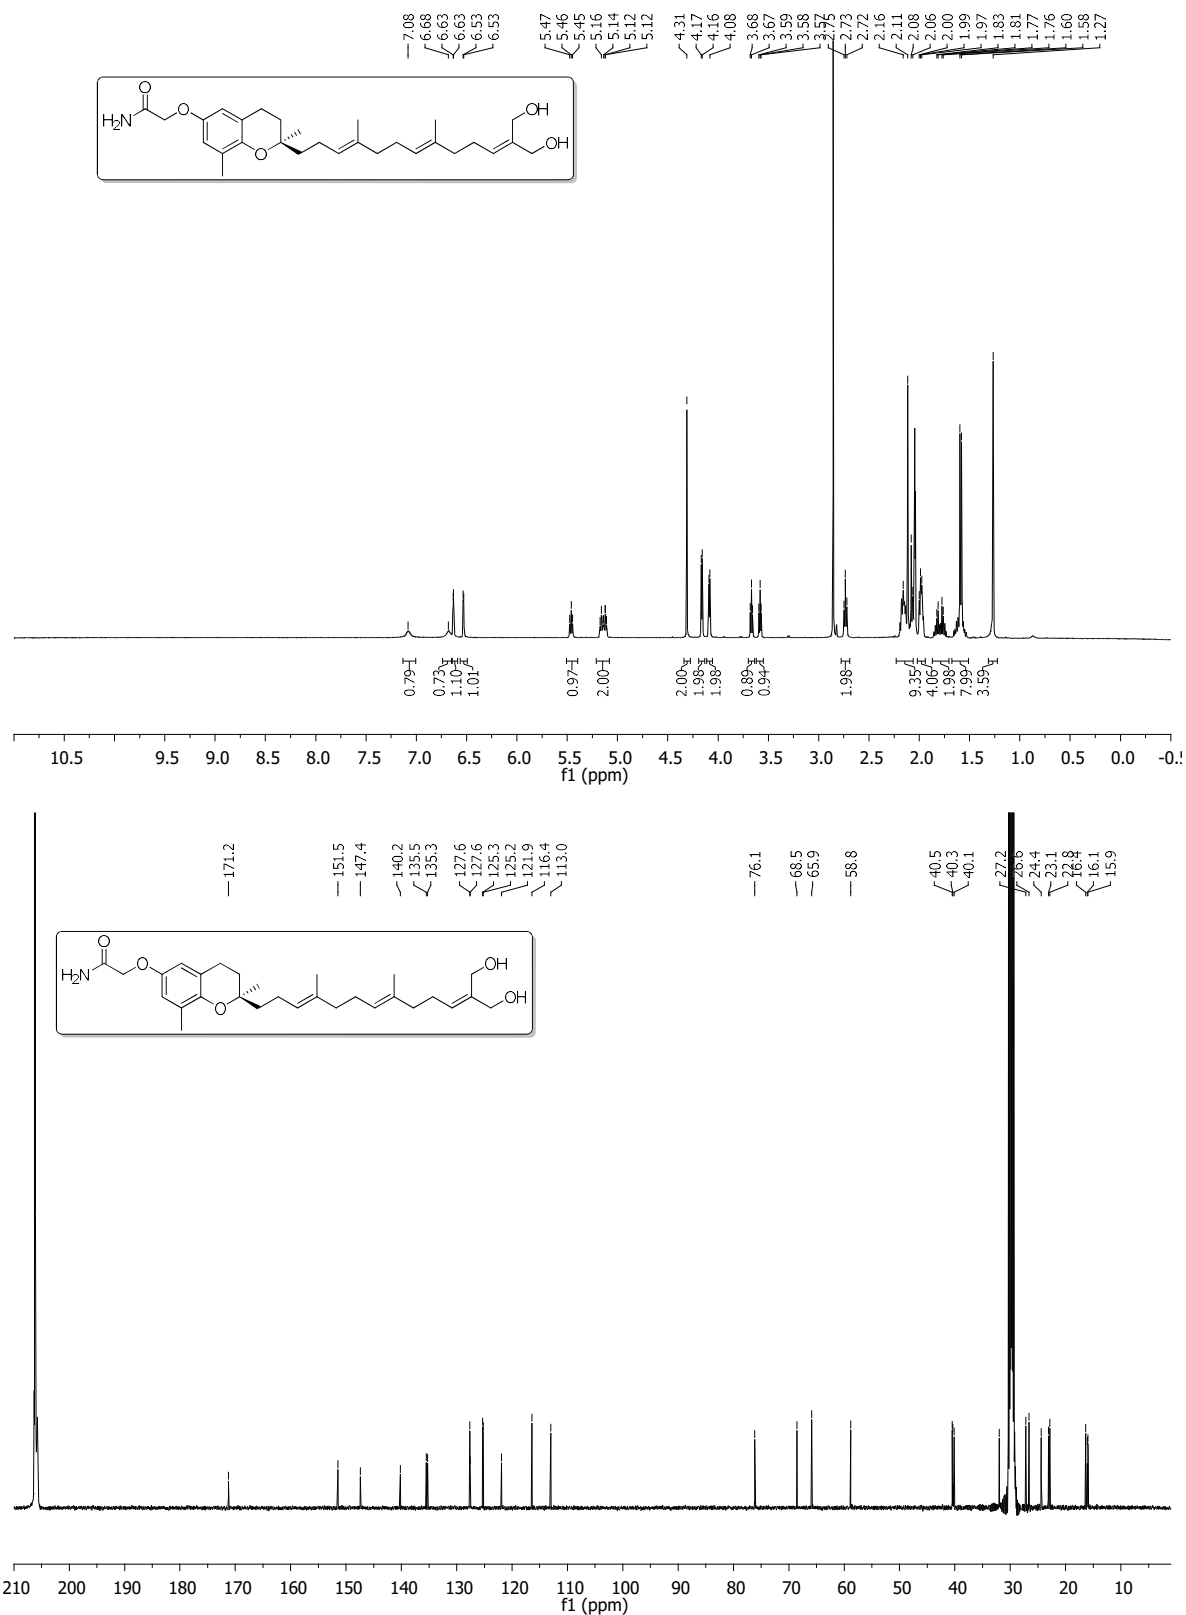

Figure S52. <sup>1</sup>H and <sup>13</sup>C NMR spectra of 32 in acetone-*d*<sub>6</sub>

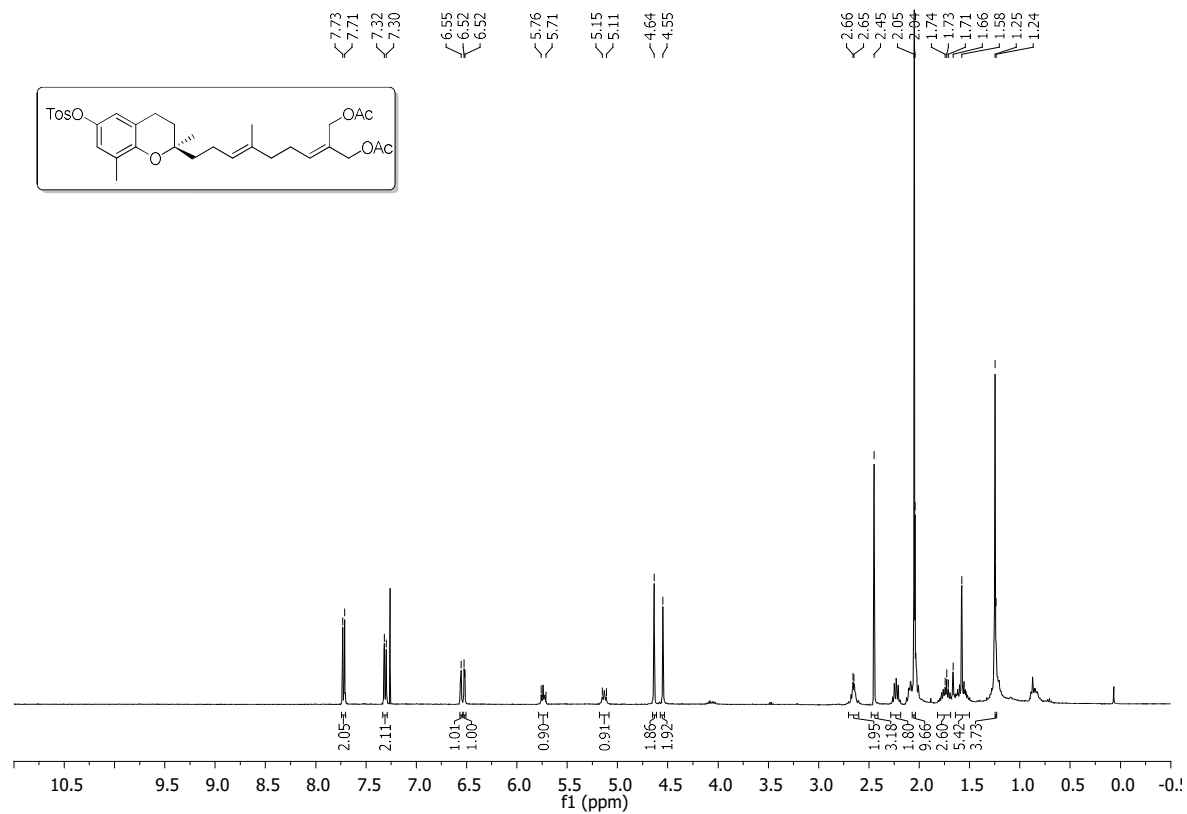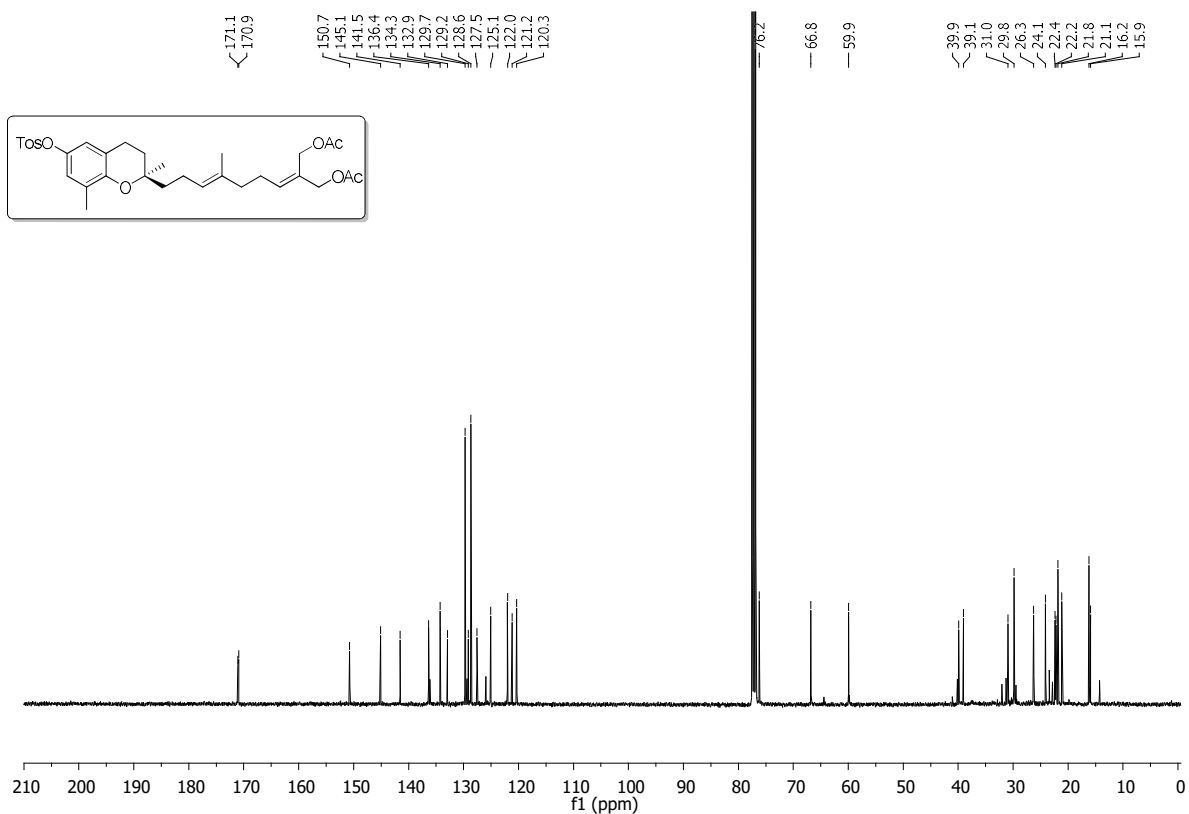

Figure S53. <sup>1</sup>H and <sup>13</sup>C NMR spectra of 62 in CDCl<sub>3</sub>

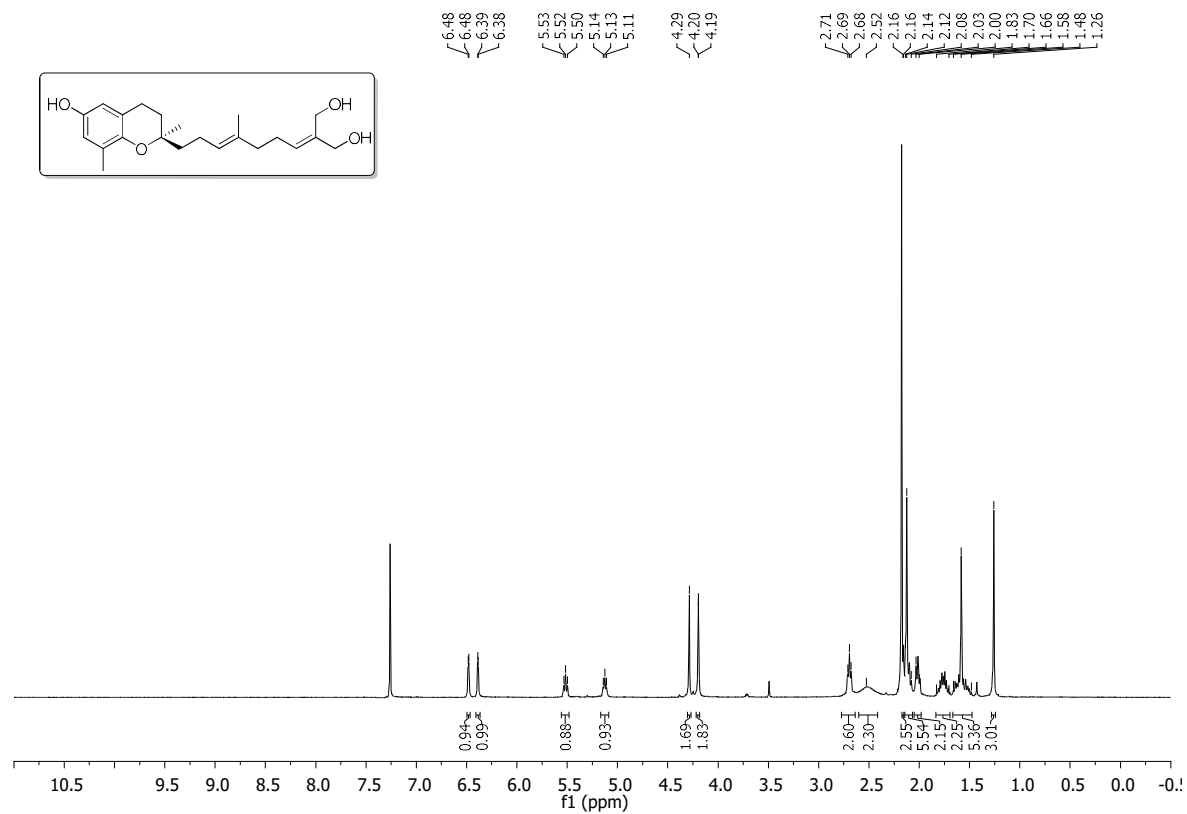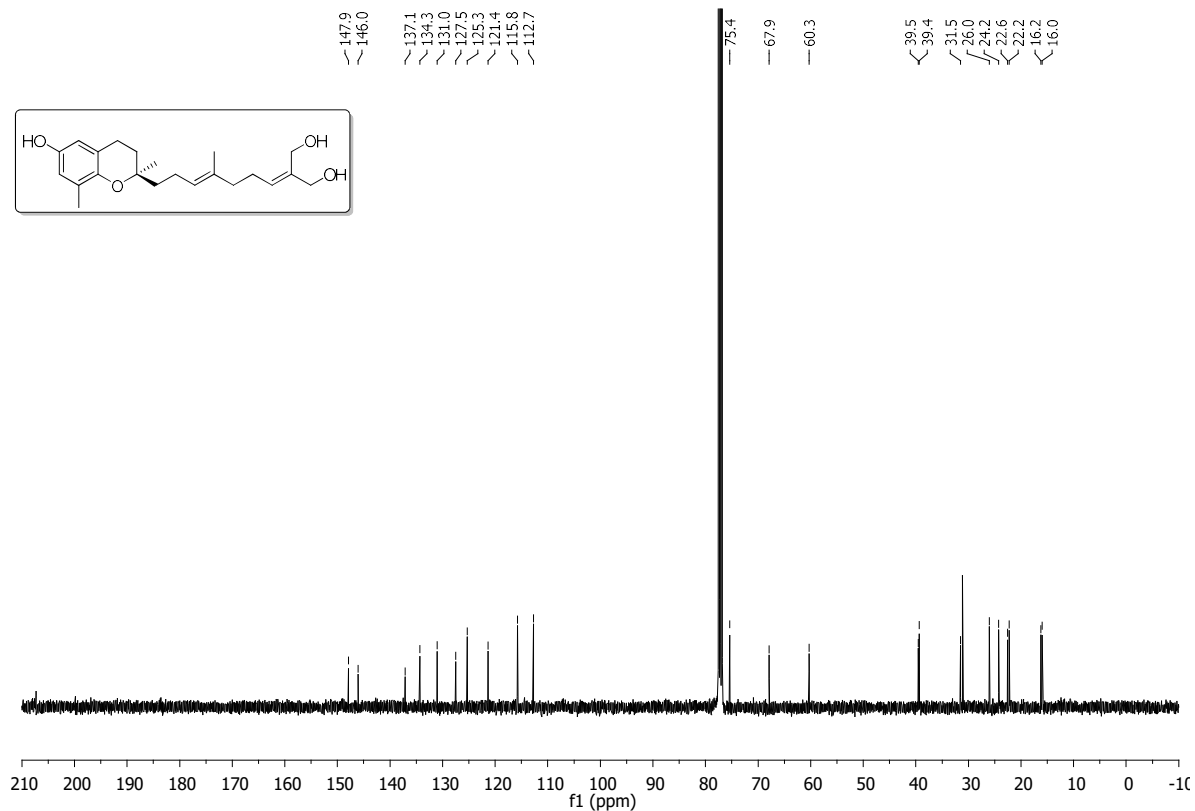

Figure S54. <sup>1</sup>H and <sup>13</sup>C NMR spectra of 28 in CDCl<sub>3</sub>

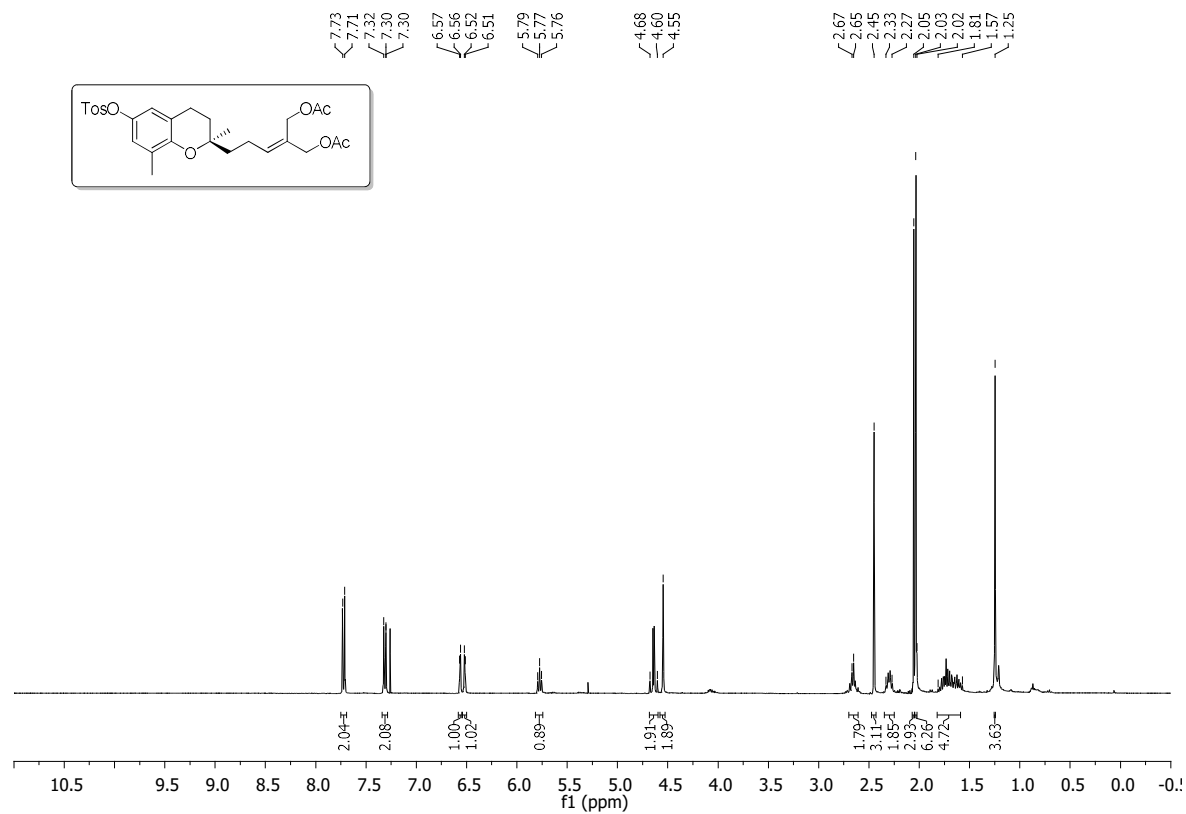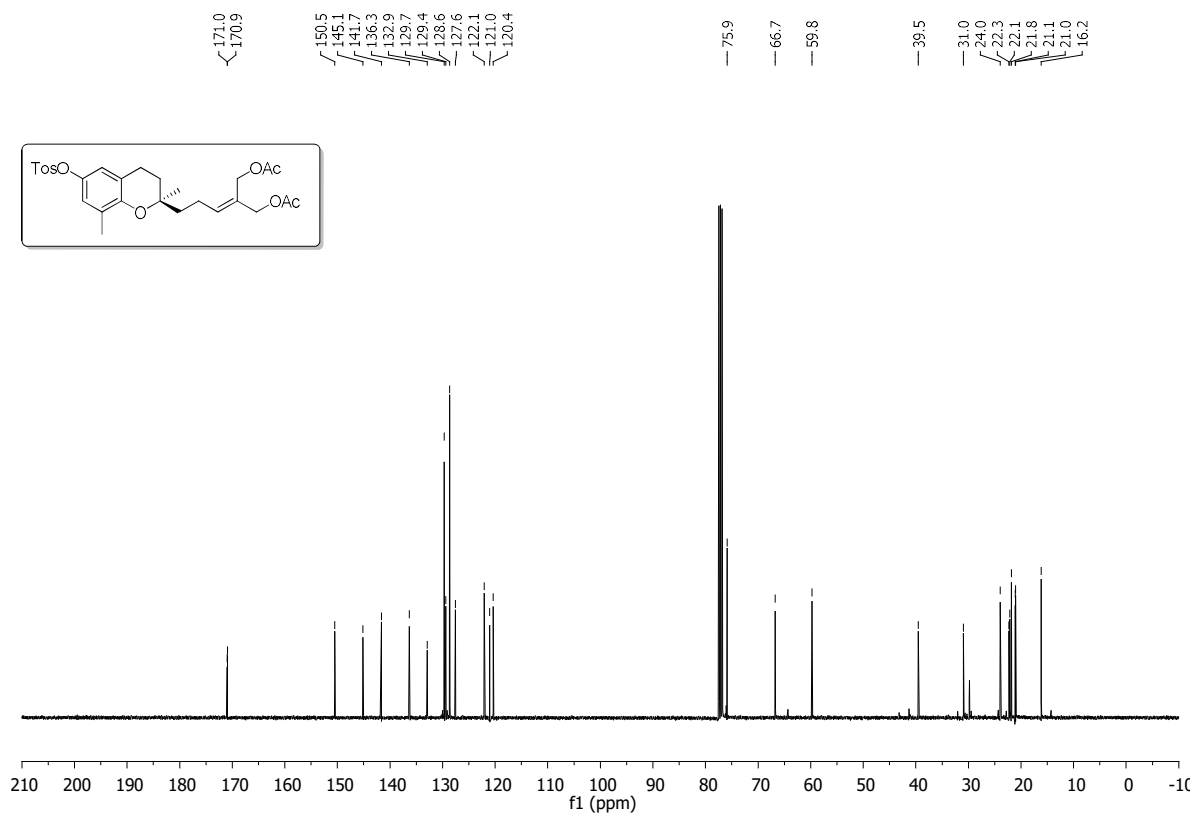

Figure S55. <sup>1</sup>H and <sup>13</sup>C NMR spectra of 63 in CDCl<sub>3</sub>

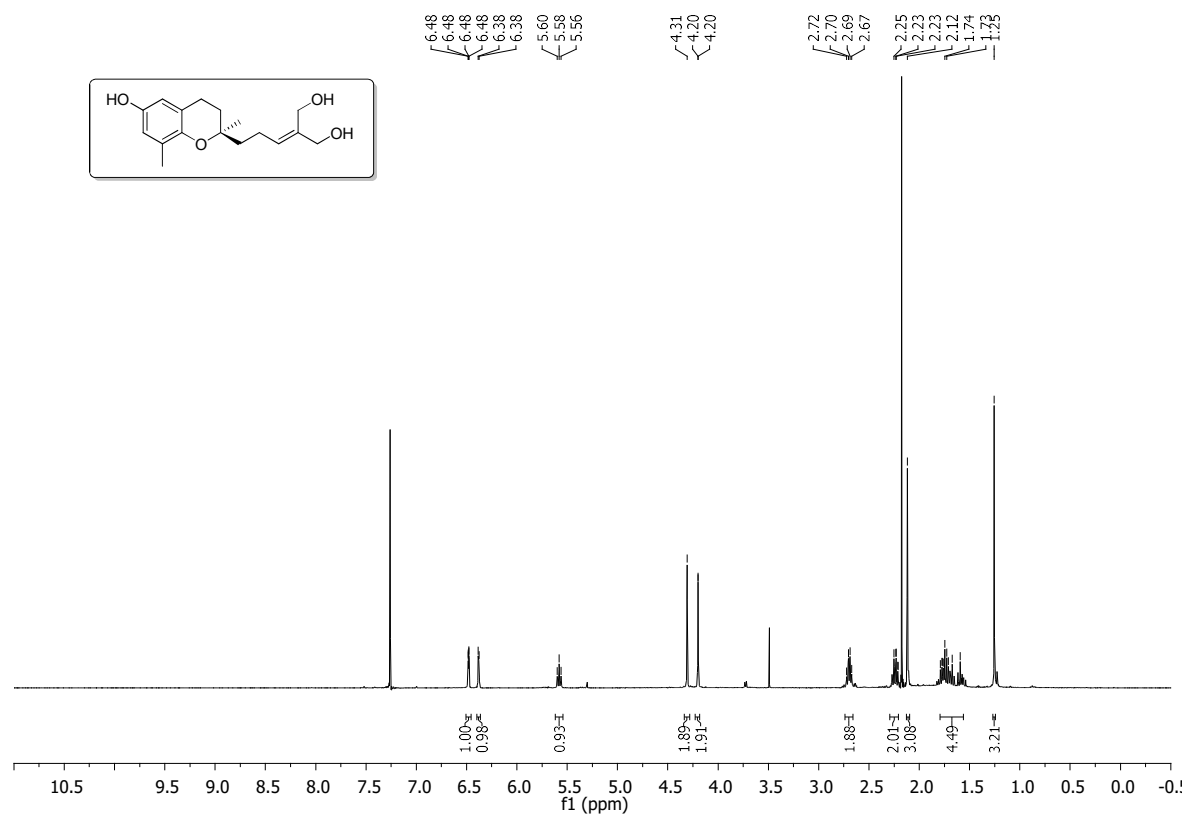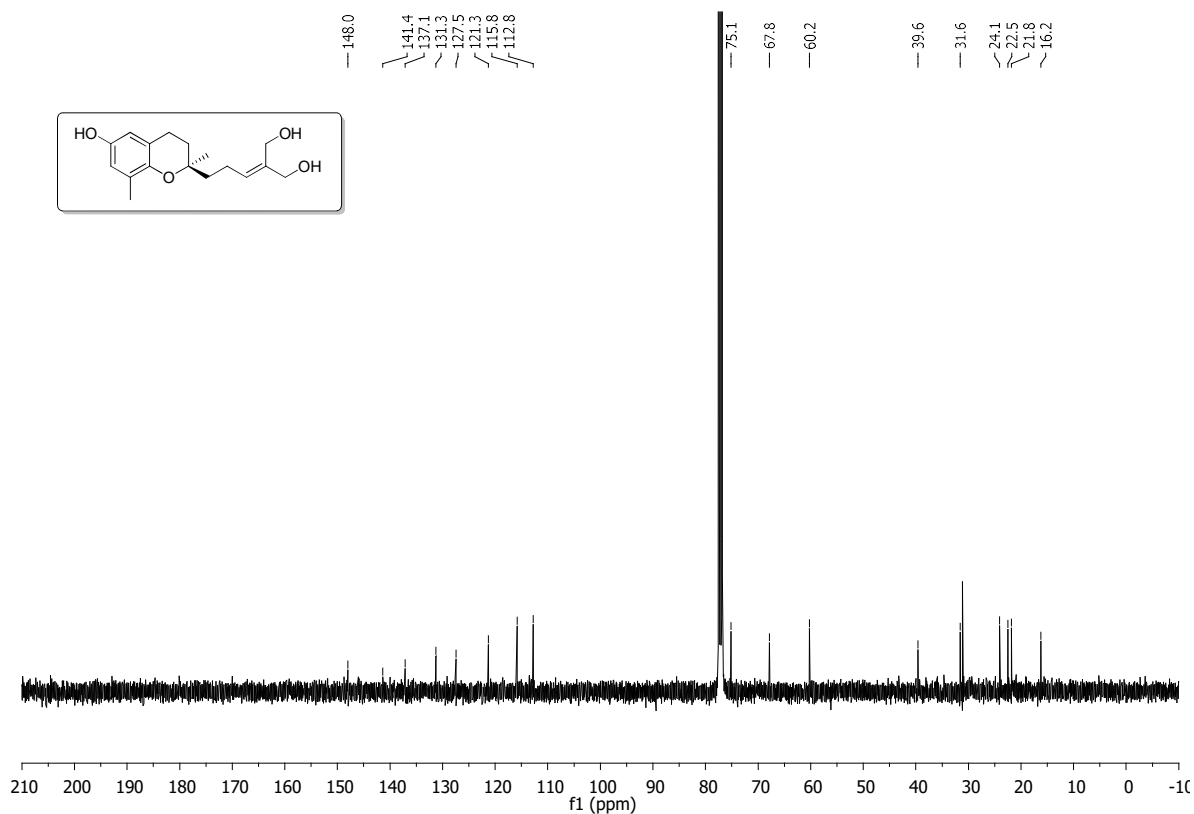

Figure S56. <sup>1</sup>H and <sup>13</sup>C NMR spectra of 29 in CDCl<sub>3</sub>

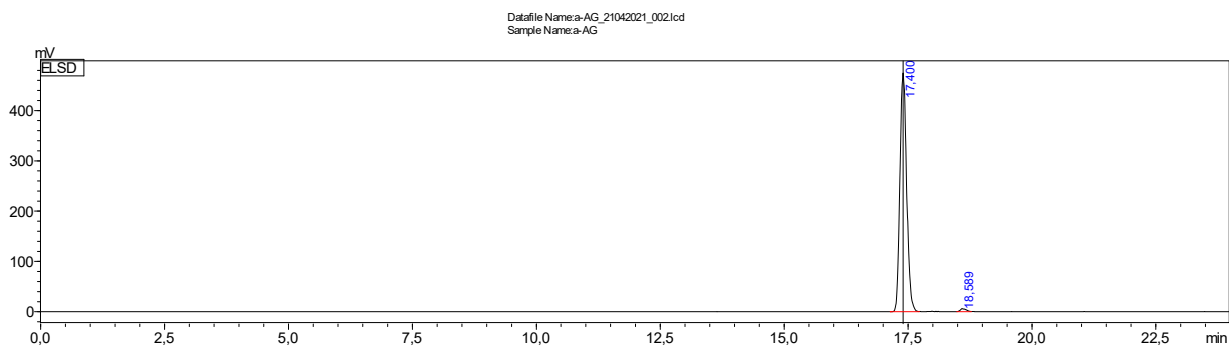

| Peak # | Retention time | Area    | Area [%] |
|--------|----------------|---------|----------|
| 1      | 17.4           | 4484067 | 98.891   |
| 2      | 18.589         | 50276   | 1.109    |
| Total  |                | 4534343 | 100.0    |

**Figure S57. HPLC-ELSD spectrum of 13a**

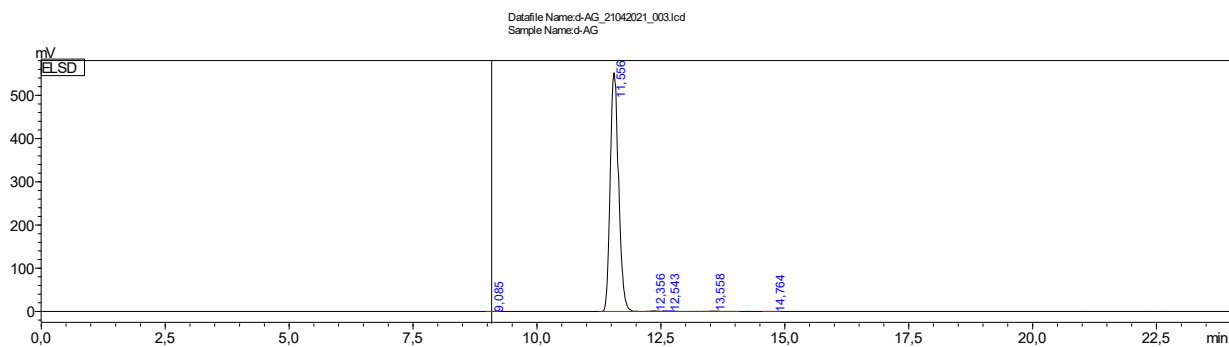

| Peak # | Retention time | Area    | Area [%] |
|--------|----------------|---------|----------|
| 1      | 9.085          | 2041    | 0.031    |
| 2      | 11.556         | 6517329 | 99.552   |
| 3      | 12.356         | 12010   | 0.183    |
| 4      | 12.543         | 2114    | 0.032    |
| 5      | 13.558         | 10641   | 0.163    |
| 6      | 14.764         | 2495    | 0.038    |
| Total  |                | 6546630 | 100.0    |

**Figure S58. HPLC-ELSD spectrum of 13d**

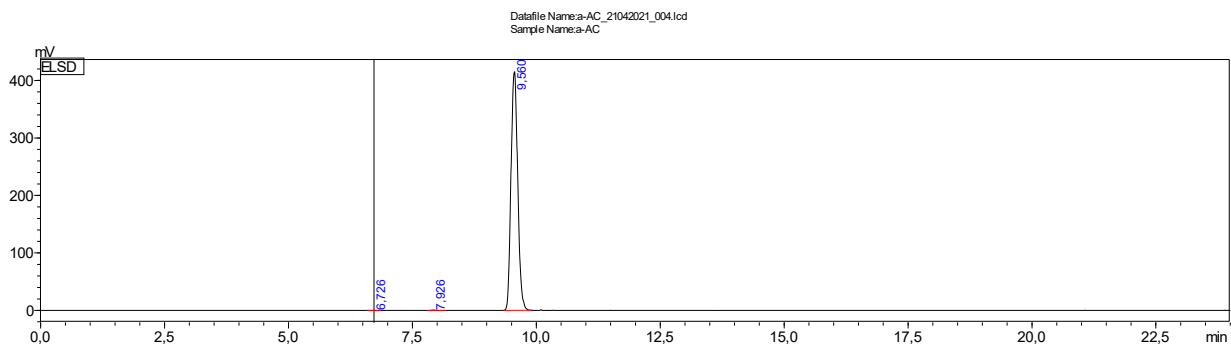

| Peak # | Retention time | Area    | Area [%] |
|--------|----------------|---------|----------|
| 1      | 6.726          | 1919    | 0.049    |
| 2      | 7.926          | 4813    | 0.123    |
| 3      | 9.560          | 3912194 | 99.828   |
| Total  |                | 3918926 | 100.0    |

**Figure S59. HPLC-ELSD spectrum of 27a**

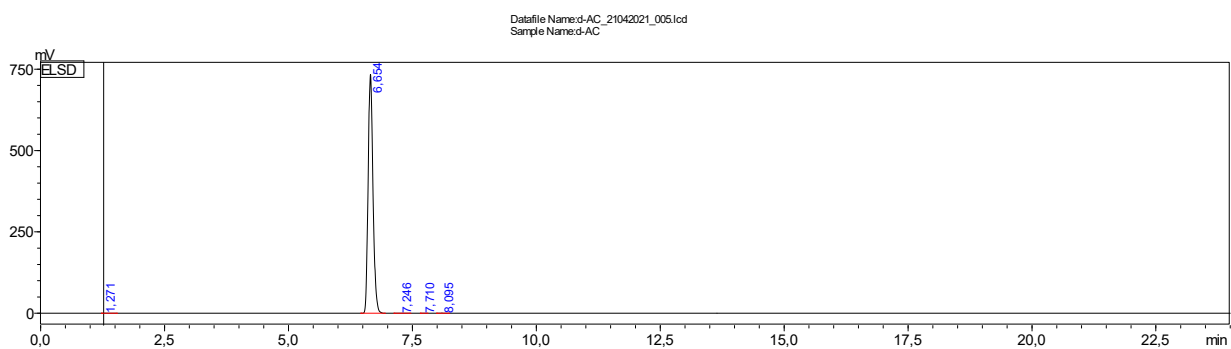

| Peak # | Retention time | Area    | Area [%] |
|--------|----------------|---------|----------|
| 1      | 1.271          | 1993    | 0.040    |
| 2      | 6.654          | 4995475 | 99.916   |
| 3      | 7.246          | 576     | 0.012    |
| 4      | 7.710          | 446     | 0.009    |
| 5      | 8.095          | 1184    | 0.024    |
| Total  |                | 4999674 | 100.0    |

**Figure S60. HPLC-ELSD spectrum of 27d**
